# Supplementary material for: Proteochemometric Modeling Identifies Chemically Diverse Norepinephrine Transporter Inhibitors
Source: PubMed Central journal article supplement (PMC10052348; doi:10.1021/acs.jcim.2c01645), 2023-03-16
Supplement: ci2c01645_si_001.pdf [file ci2c01645_si_001.pdf]

# Supporting Information

## Proteochemometric Modeling Identifies Chemically Diverse Norepinephrine Transporter Inhibitors

*B.J. Bongers<sup>1†</sup>, H.J. Sijben<sup>1†</sup>, P.B.R. Hartog<sup>1</sup>, A. Tarnovskiy<sup>3</sup>, A.P. IJzerman<sup>1</sup>, L.H. Heitman<sup>1,2</sup>, G.J.P. van Westen<sup>1</sup>.*

<sup>1</sup> Division of Drug Discovery and Safety, Leiden Academic Centre for Drug Research, Leiden University, Wassenaarseweg 76, 2333 AL Leiden, The Netherlands

<sup>2</sup> Oncode Institute, Jaarbeursplein 6, 3521 AL Utrecht, The Netherlands

<sup>3</sup> Enamine Ltd., Chervonotkatska St, 67, Kyiv, Ukraine, 02094

† These authors contributed equally

Corresponding author is G.J.P. van Westen ([gerard@lacdr.leidenuniv.nl](mailto:gerard@lacdr.leidenuniv.nl))

| <b>Table of Contents</b>                                                                                                                             | <b>Page</b> |
|------------------------------------------------------------------------------------------------------------------------------------------------------|-------------|
| Figure S1: Predicted pChEMBL values of temporal split correlated to the observed values.                                                             | 2           |
| Figure S2: Counter screen of the five hit compounds in a label-free impedance-based TRACT assay.                                                     | 3           |
| Figure S3: Representative xCELLigence traces of JumpIn-NET cells during inhibitor pretreatment in a label-free impedance-based TRACT assay.          | 4           |
| Figure S4: Representative xCELLigence traces of JumpIn-NET cells during norepinephrine (NE) stimulation in a label-free impedance-based TRACT assay. | 5           |
| Table S1: Molecular and Protein descriptors used throughout the model building process.                                                              | 6           |
| Table S2: Optimal settings obtained from stepwise feature selection and grid parameter optimization.                                                 | 7           |
| Table S3: Cluster centers that were chosen for experimental follow-up.                                                                               | 8           |
| Table S4: Selected cluster compounds and nearest structurally similar compound in the training set.                                                  | 10          |
| Table S5: Single Point screen compounds and their inhibitory activity at 10 $\mu$ M.                                                                 | 22          |
| Analytical spectra for the 32 synthesized compounds selected for experimental follow-up.                                                             | 28          |

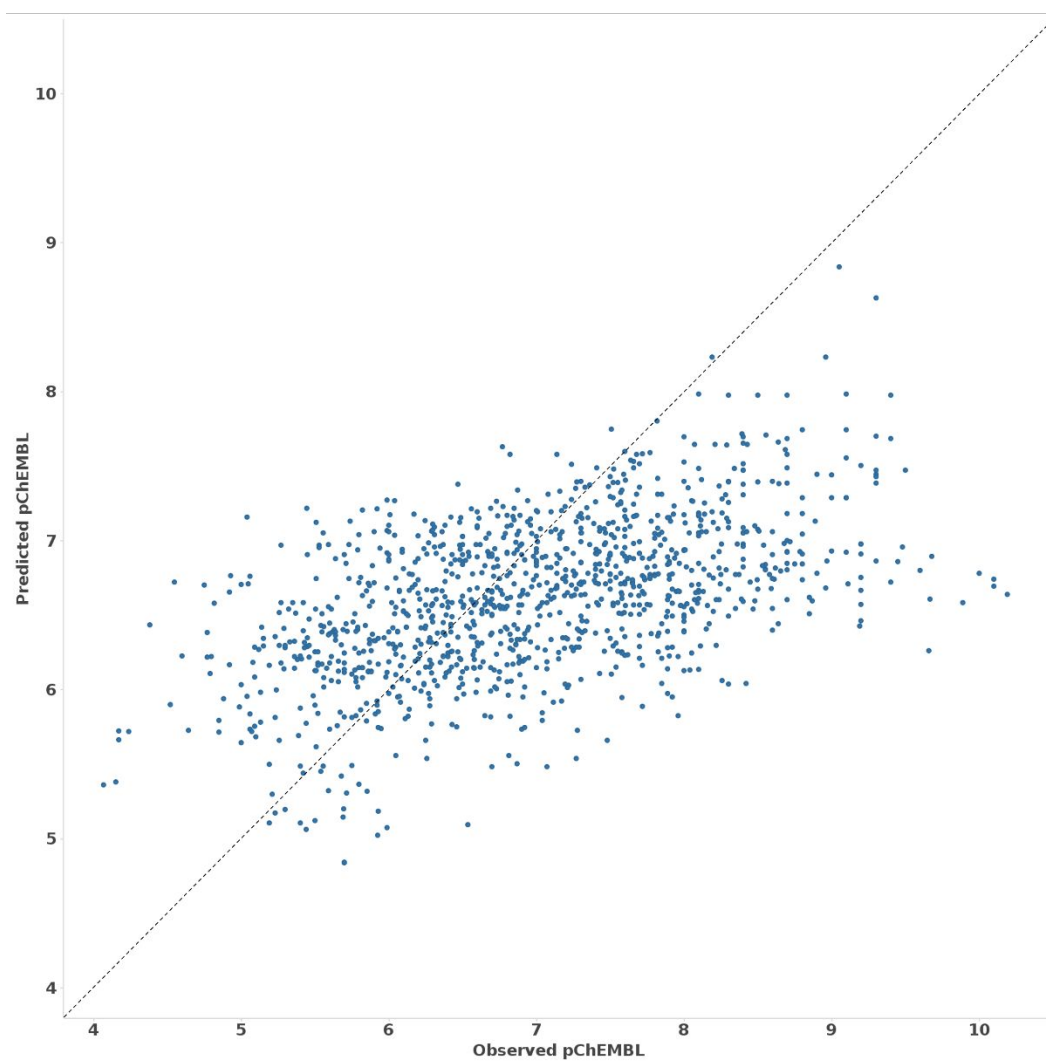

**Figure S1. Predicted pChEMBL values of temporal split correlated to the observed values.** Temporal split prediction where all known interactions of ChEMBL of 2010 and before were used as training set (15.106 data points) and those of 2011 and later (5.083 data points) were used as the test set.  $R^2$  was 0.24 and RMSE was 1.02.

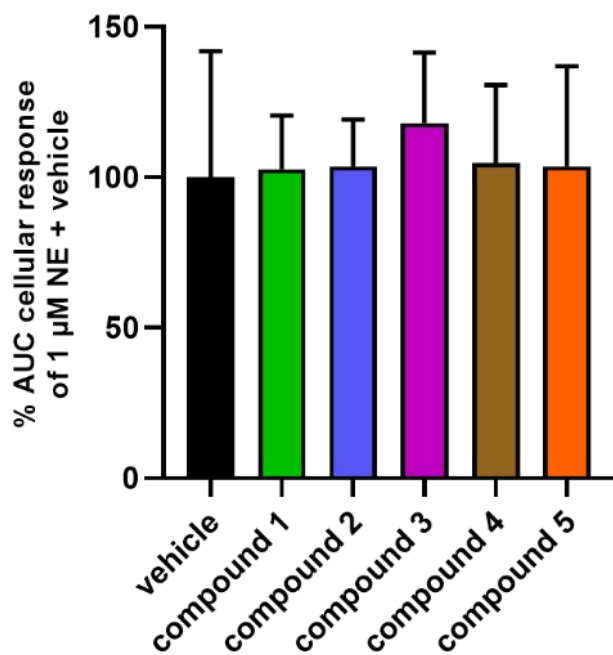

**Figure S2. Counter screen of the five hit compounds in a label-free impedance-based TRACT assay.** JumpIn-  
NET were not induced with doxycycline and as such did not express NET. Cells were pretreated for 1 h with either  
vehicle or 10  $\mu$ M of the hit compound. Subsequently, cells were stimulated with 1  $\mu$ M norepinephrine (NE) and  
Cell Index (CI) was measured for 30 min. Cellular responses are expressed as the net area under the curve (AUC)  
of the first 30 minutes after stimulation with NE. Data were normalized to the response of NE only (vehicle,  
100%). Data are shown as the mean  $\pm$  SD of two separate experiments each performed in duplicate.

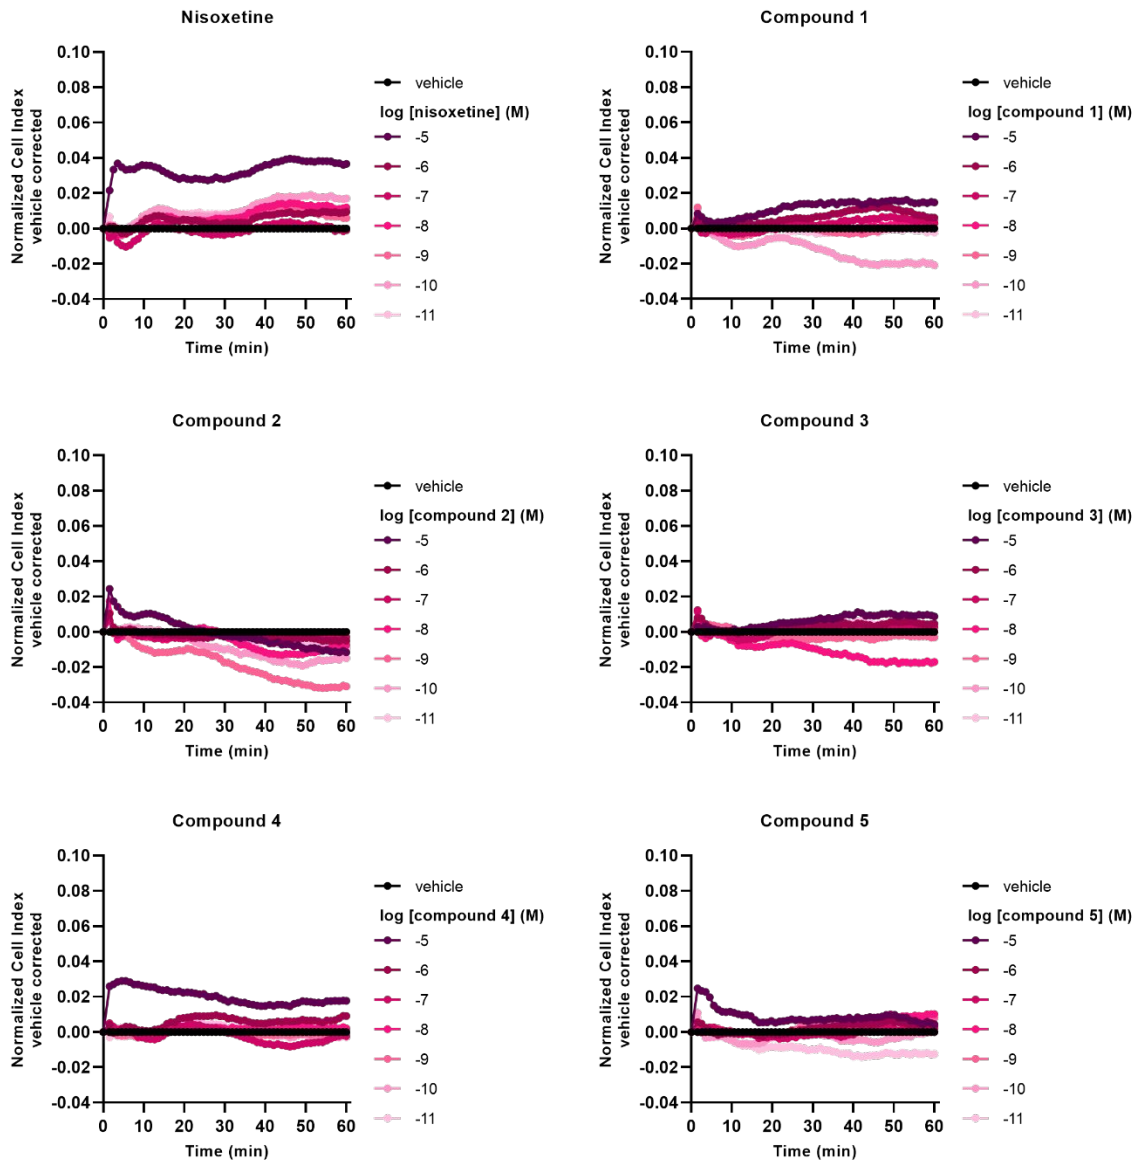

**Figure S3. Representative xCELLigence traces of JumpIn-NET cells during inhibitor pretreatment in a label-free impedance-based TRACT assay.** Cells were pretreated for 1 h with either vehicle or increasing concentrations of nisoxetine or hit compound. Cell Index was normalized to the time point prior to inhibitor addition ( $t = 0$  min). Data are shown as the mean of a representative experiment.

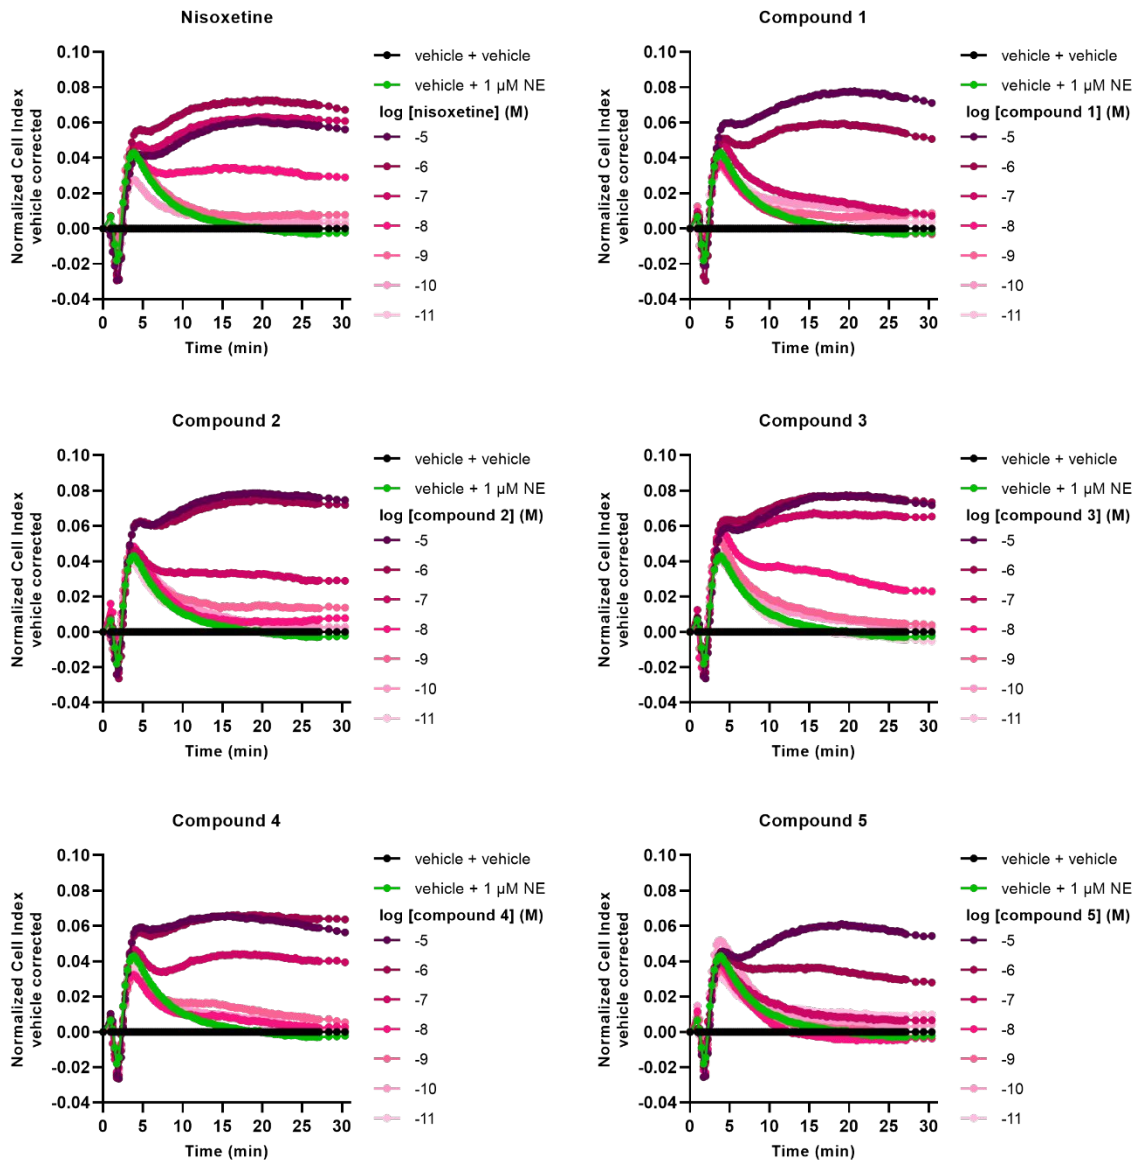

**Figure S4. Representative xCELLigence traces of JumpIn-NET cells during norepinephrine (NE) stimulation in a label-free impedance-based TRACT assay.** Cells were pretreated for 1 h with either vehicle or increasing concentrations of nisoxetine or hit compound, and subsequently stimulated with vehicle or 1  $\mu$ M NE. Cell Index was normalized to the time point prior to NE addition ( $t = 0$  min). Data are shown as the mean of a representative experiment.

**Table S1. Molecular and Protein descriptors used throughout the model building process.**

| Molecular Descriptors                                  |        | Protein Descriptors                       |               |
|--------------------------------------------------------|--------|-------------------------------------------|---------------|
| ALogP                                                  | SCFC 6 | Amino Acid Composition                    | ACC c scales  |
| Molecular Weight                                       | FPFC 6 | Dipeptide Composition                     | ACC DPPS      |
| Number of Hydrogen Donors                              | EPFC 6 | Auto Correlation Descriptors              | ACC E scales  |
| Number of Hydrogen Acceptors                           | LPFC 6 | Composition Transition Distribution       | ACC G scales  |
| Number of Rotatable Bonds                              | SPFC 6 | Quasi Sequence Order Descriptors          | ACC HESH      |
| Number of Bridge Bonds                                 | FEFC 6 | Pseudo Amino Acid Composition             | ACC HSEHPCSV  |
| Number of Atoms                                        | EEFC 6 | Amphiphilic Pseudo Amino Acid Composition | ACC Norinder  |
| Number of Rings                                        | LEFC 6 | Total Amino Acid Properties               | ACC Kidera    |
| Number of Aromatic Rings                               | SEFC 6 | Aligned Z scales Sandberg                 | ACC P scales  |
| Number of Fragments                                    | FHFC 6 | Aligned FASGAI                            | ACC QCP       |
| N Plus O Count                                         | EHFC 6 | Aligned BLOSUM                            | ACC Sneath    |
| Molecular Solubility                                   | LHFC 6 | ACC Z scales Hellberg                     | ACC SVEEVA    |
| Molecular Surface Area                                 | SHFC 6 | ACC Z scales Jonsson                      | ACC SVHEHS    |
| Molecular Polar Surface Area                           | FCFP 6 | ACC Z scales Sandberg                     | ACC SVRG      |
| Molecular Polar Solvent-Accessible Surface Area (SASA) | ECFP 6 | ACC Z scales binary                       | ACC SVWG      |
| Estate Keys                                            | LCFP 6 | ACC T scales                              | ACC V scales  |
| Estate Counts                                          | SCFP 6 | ACC ST scales                             | ACC VSGETAWAY |
| MDLPublicKeys                                          | FPFP 6 | ACC VHSE                                  | ACC VSTPV     |
| MDL2DKeys960                                           | EPFP 6 | ACC ISA ECI                               | ACC VSW       |
| MDL2DKeys166                                           | LPFP 6 | ACC GRID t-score                          | ACC VTSA      |
| PHFP 2-4                                               | SPFP 6 | ACC VSTV                                  | ACC SVGER     |
| PHRFP 2-4                                              | FEFP 6 | ACC MSWHIM                                | ACC PSM       |
| PHFP 2-4                                               | EEFP 6 | ACC_FASGAI                                | ACC SSIA AM1  |
| PHFC 2-4                                               | LEFP 6 | ACC_BLOSUM                                | ACC SSIA PM3  |
| PHPFC 2-4                                              | SEFP 6 | ACC_VARIMAX                               | ACC SSIA HF   |
| PHRFC 2-4                                              | FHFP 6 | ACC Protein fingerprint numerical         | ACC SSIA DFT  |
| FCFC 6                                                 | EHFP 6 | ACC Protein fingerprint hash              |               |
| ECFC 6                                                 | LHFP 6 |                                           |               |
| LCFC 6                                                 | SHFP 6 |                                           |               |

**Table S2. Optimal settings obtained from stepwise feature selection and grid parameter optimization.** Displayed are the optimal settings for random forest, gradient boosting, partial least squares, and the final model which contained an ensemble of random Forest and gradient boosting, with a partial least squares stack on top of it.

| Optimal Model                                                                                                       | Optimal Features                                                                                                                                                                                                                                                     | Optimal Parameters      |          |
|---------------------------------------------------------------------------------------------------------------------|----------------------------------------------------------------------------------------------------------------------------------------------------------------------------------------------------------------------------------------------------------------------|-------------------------|----------|
| <b>Random Forest</b>                                                                                                | Num_H_Donors<br>Num_RotatableBonds<br>Num_Atoms<br>Molecular_Solubility<br>Molecular_SurfaceArea<br>PHPFC2<br>PHRFC2<br>SCFC6<br>G9TotalAminoAcidProperties<br>ACC_ISA_ECI<br>ACC_ProtFP_hash                                                                        | Number of Trees         | 1000     |
|                                                                                                                     |                                                                                                                                                                                                                                                                      | Number of Descriptors   | Sqrt(D)* |
|                                                                                                                     |                                                                                                                                                                                                                                                                      | Minimum Node Size       | 1        |
|                                                                                                                     |                                                                                                                                                                                                                                                                      | Maximum Depth           | None     |
| <b>Gradient Boosting</b>                                                                                            | MDLPublicKeys<br>MDL2DKeys960<br>G4CompositionTransitionDistribution<br>Aligned_FASGAI<br>ACC_VARIMAX<br>ACC_ProtFP_numerical<br>ACC_DPPS<br>ACC_HESH<br>ACC_SVHEHS<br>ACC_VSTPV                                                                                     | Maximum number of Trees | 1000     |
|                                                                                                                     |                                                                                                                                                                                                                                                                      | Learning Rate           | 0.1      |
|                                                                                                                     |                                                                                                                                                                                                                                                                      | Gamma                   | 0.3      |
|                                                                                                                     |                                                                                                                                                                                                                                                                      | Maximum Depth           | 7        |
|                                                                                                                     |                                                                                                                                                                                                                                                                      | Data Fraction           | 1.0      |
|                                                                                                                     |                                                                                                                                                                                                                                                                      | Descriptor Fraction     | 0.5      |
| <b>Partial Least Squares</b>                                                                                        | MDL2DKeys960<br>LEFC6<br>SCFP6<br>FPFP6<br>FEFP6<br>G1AminoAcidComposition<br>ACC_FASGAI<br>ACC_Norinder<br>ACC_SVRG<br>ACC_SVGER                                                                                                                                    | Number of Variables     | 200      |
|                                                                                                                     |                                                                                                                                                                                                                                                                      |                         |          |
|                                                                                                                     |                                                                                                                                                                                                                                                                      |                         |          |
|                                                                                                                     |                                                                                                                                                                                                                                                                      |                         |          |
|                                                                                                                     |                                                                                                                                                                                                                                                                      |                         |          |
|                                                                                                                     |                                                                                                                                                                                                                                                                      |                         |          |
|                                                                                                                     |                                                                                                                                                                                                                                                                      |                         |          |
|                                                                                                                     |                                                                                                                                                                                                                                                                      |                         |          |
| <b>1<sup>st</sup> stack Random Forest &amp; Gradient Boost</b><br><b>2<sup>nd</sup> Stack Partial Least Squares</b> | AlogP<br>Num_H_Acceptors<br>Num_BridgeBonds<br>Molecular_Solubility<br>Estate_Counts<br>PHPFC2<br>G1AminoAcidComposition<br>G9TotalAminoAcidProperties<br>ACC_ISA_ECI<br>Gradient Boost Predictions<br>Random Forest Predictions<br>Random Forest Predictions StdDev | Number of Variables     | 100      |
|                                                                                                                     |                                                                                                                                                                                                                                                                      |                         |          |
|                                                                                                                     |                                                                                                                                                                                                                                                                      |                         |          |
|                                                                                                                     |                                                                                                                                                                                                                                                                      |                         |          |
|                                                                                                                     |                                                                                                                                                                                                                                                                      |                         |          |
|                                                                                                                     |                                                                                                                                                                                                                                                                      |                         |          |
|                                                                                                                     |                                                                                                                                                                                                                                                                      |                         |          |
|                                                                                                                     |                                                                                                                                                                                                                                                                      |                         |          |
|                                                                                                                     |                                                                                                                                                                                                                                                                      |                         |          |
|                                                                                                                     |                                                                                                                                                                                                                                                                      |                         |          |
|                                                                                                                     |                                                                                                                                                                                                                                                                      |                         |          |

**Table S3. Cluster centers that were chosen for experimental follow-up (46 centers). Of these, 32 were able to be synthesized, as shown in the right-most column.**

| Enamine ID Number | SMILES                                                               | Synthesized |
|-------------------|----------------------------------------------------------------------|-------------|
| Z2393213853       | <chem>CCCN(C(=O)C1=CC=CC=C1OCC1CC1)C1CCNC1</chem>                    | Yes         |
| Z2444727652       | <chem>CC1=NC=CC=C1CN(CC1=CC=CC=C1)C1CCCNC1</chem>                    | No          |
| Z2769565776       | <chem>CN(C)C1=CC=C(F)C=C1CNCC1(O)CC2=CC=CC=C2C1</chem>               | Yes         |
| Z1986623199       | <chem>CC(N[C@H]1C[C@H](C2=CC=C(Cl)C(Cl)=C2)C1)C1CCOCC1</chem>        | Yes         |
| Z1904820040       | <chem>OCCCCNC1CCCC1C1=CC=C(Cl)C(Cl)=C1</chem>                        | Yes         |
| PV-001918160326   | <chem>CCOC(CN1CC=C(C2=C[NH]C3=CC(F)=CC=C23)CC1)C1CC1</chem>          | Yes         |
| Z2569757498       | <chem>FC1=CC=CC([C@@H]2CCNC[C@@H]2NCC2=CC=C3OCCOC3=C2)=C1</chem>     | Yes         |
| PV-001919825446   | <chem>OC(CNC(C1=CC=C(F)C(Cl)=C1)C1CC1)COC1=CC=CC2=C1C=C[NH]2</chem>  | No          |
| Z1083362508       | <chem>O=C(C1CC1C1=CC=C(Cl)C(Cl)=C1)N1CCCC(OCC(F)(F)F)C1</chem>       | Yes         |
| Z1783772638       | <chem>CC(C)(CNCCC1CCOC1)C1=CC=C(Cl)C(Cl)=C1</chem>                   | Yes         |
| Z2444828348       | <chem>CC1(CN2CCOC(C3=CC=C(Cl)C(Cl)=C3)C2)CCNC1</chem>                | Yes         |
| Z2698567135       | <chem>CC(C)(CNCC1CCCOC1)C1=CC=C2C=CC=CC2=C1</chem>                   | Yes         |
| Z1663514926       | <chem>CC(C)C(NCCC1CCOC1)C1=CC=C(Cl)C(Cl)=C1</chem>                   | Yes         |
| PV-000916662553   | <chem>C#CCCNCC1CCCNC1(C=O)C1=CC=CC2=C1OCC2(C)C</chem>                | No          |
| PV-001921689112   | <chem>CCN1CCC(N[C@@H]2CCO[C@H]2C2=CC=C(Cl)C(F)=C2)C1=O</chem>        | Yes         |
| Z2447436630       | <chem>ClC1=CC=CC(C2=NC(CN(C3CC3)C3CCNC3)=CO2)=C1</chem>              | Yes         |
| Z2843312692       | <chem>CN1C=C(C2CC3CCC(C2)N3CC(O)C2=CC=C(Cl)C(F)=C2)C=N1</chem>       | Yes         |
| PV-001918950467   | <chem>FC1=CC=CC(CCN2CCN(C3=C(Cl)C=CC=C3Cl)CC2)=C1</chem>             | Yes         |
| PV-001919382948   | <chem>CC1(C2=CC=CC(Cl)=C2)CCN(CC(O)COC2=CC=CC3=C2C=C[NH]3)CC1</chem> | No          |
| PV-001919716605   | <chem>CCC1=CC=C(N2CCN(CC(O)COC3=CC=CC4=C3C=C[NH]4)CC2)C=C1Cl</chem>  | No          |
| Z2444770829       | <chem>FC(F)(F)C1=CC(CN(C2CC2)C2CCNC2)=CC=C1Cl</chem>                 | No          |
| Z2445178480       | <chem>ClC1=CC=C(CCC2=NC(C3CCNCC3)=NO2)C=C1Cl</chem>                  | No          |
| Z2617873335       | <chem>ClC1=CC=CC(OCC2=NOC(C[C@H]3CCNC3)=N2)=C1Cl</chem>              | Yes         |
| Z2846041003       | <chem>CC(C1=CC=C(Cl)C(Cl)=C1)N1C=C(C2CCCNC2)N=N1</chem>              | Yes         |
| Z2488796202       | <chem>CCC1(C(=O)N2CC=C(C3=C[NH]C4=CC(F)=CC=C34)CC2)CCCN1</chem>      | Yes         |
| Z2354724931       | <chem>COC1=CC=C(CNC2CNCCC2(F)F)C=C1OCC1=CC=CC=C1</chem>              | No          |
| PV-000923491934   | <chem>CCCNCC1(C)CCN(C(=O)C2=C[NH]C3=CC=C(F)C=C23)C1</chem>           | No          |
| PV-001917796783   | <chem>CCN(CC1(C2=CC=C(Cl)C(Cl)=C2)CCC1)C1CC1</chem>                  | No          |
| Z1421251686       | <chem>OC(COC1=CC=CC2=C1C=C[NH]2)CN1CCC(C2=CC=C(F)C(F)=C2)CC1</chem>  | No          |
| Z2436746713       | <chem>O=C(CCC1CCNC1)N1CCOC(C2=CC=C(Cl)C(Cl)=C2)C1</chem>             | Yes         |
| PV-001930327687   | <chem>ClC1=CC=C(C2CCCC2NC[C@@H]2CCCO2)C=C1Cl</chem>                  | No          |
| PV-001923897672   | <chem>CCC1CC(NCC(C)(C)C2=CC=C(Cl)C(Cl)=C2)CCO1</chem>                | Yes         |
| Z1505378916       | <chem>C1=CC=C(C2CN(CCN3C=CN=C3)CC3=CC=CC=C32)C=C1</chem>             | No          |
| Z2201777668       | <chem>OCC(NC1CCN(CC2=CC=CC=C2Cl)CC1)C1=CC=C(Br)C(F)=C1</chem>        | Yes         |
| PV-001918897538   | <chem>CC1CC(CN(CCO)CC2=CC=C(Cl)C(Cl)=C2)C1</chem>                    | Yes         |
| PV-001917367008   | <chem>ClC1=CC=C(C2CN(CC[C@@H]3C[C@H]3C3CC3)CCO2)C=C1Cl</chem>        | Yes         |
| Z2361435743       | <chem>CC(C)(CNC(=O)NCC1CNCCO1)C1=CC=C(Cl)C(Cl)=C1</chem>             | Yes         |
| Z1485114833       | <chem>OC(COC1=CC=CC=C1F)CN1CC=C(C2=C[NH]C3=CC(F)=CC=C23)CC1</chem>   | Yes         |
| Z3045122589       | <chem>OC(CNCC1CSC2=CC=CC=C2O1)C1=CC=C(F)C(F)=C1</chem>               | Yes         |
| PV-001926691632   | <chem>CC1=CC(Cl)=CC=C1OC1=CC=C(F)C=C1CNC[C@H]1C[C@H](O)C1</chem>     | Yes         |



|                 |                                                                   |     |
|-----------------|-------------------------------------------------------------------|-----|
| PV-001919611983 | <chem>CC(C)NC(=O)OCC1CCCCN1C[C@H](O)C1=CC=C(Cl)C(Cl)=C1</chem>    | Yes |
| Z2722622816     | <chem>OC(CNC1CCN(C2=CC=C(Cl)C=C2F)C1)C1=CC=CC(F)=C1</chem>        | Yes |
| Z2444696415     | <chem>CCCN(CC1=CC=C(F)C=C1C(F)(F)F)C1CCNCC1</chem>                | No  |
| Z3100431738     | <chem>O=C(C1=CN=C(C2CCNCC2)O1)N(CC1=CC=C(Cl)C(Cl)=C1)C1CC1</chem> | Yes |
| PV-001925822957 | <chem>CC1=CC(Cl)=CC=C1OC1=CC=C(F)C=C1CNCC(C)CN(C)C</chem>         | Yes |
| Z2488563933     | <chem>CCCN(C(=O)C1=CC=C2[NH]C=CC2=C1)C1CCNC1</chem>               | Yes |

**Table S4: Selected cluster compounds and their nearest structurally similar compound in the training set. Based on Tanimoto Similarity (ECFP\_6). The Enamine 'Q-Code' refers to the codes found in Table S6.**

| Cluster Molecule                                                                                                                                                                                                                                                                               | Nearest Training Molecule                                                                                                                                                                                                                                                              |
|------------------------------------------------------------------------------------------------------------------------------------------------------------------------------------------------------------------------------------------------------------------------------------------------|----------------------------------------------------------------------------------------------------------------------------------------------------------------------------------------------------------------------------------------------------------------------------------------|
| 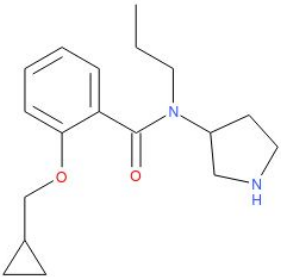 <p><b>Cluster SMILES</b><br/> <chem>CCCN(C(=O)C1=CC=CC=C1OC1CC1)C1CCNC1</chem></p> <p><b>Enamine ID</b><br/>           Z2393213853</p> <p><b>Enamine Q-Code</b><br/>           Q754936\$1</p>                |  <p><b>Training SMILES</b><br/> <chem>CCOc1ccccc1C(=O)N(CC2CCC2)[C@H]3CCNC3</chem></p> <p><b>ChEMBL ID</b><br/>           CHEMBL551471</p> <p><b>Tanimoto Similarity</b><br/>           0.557</p>    |
|  <p><b>Cluster SMILES</b><br/> <chem>CC1=NC=CC=C1CN(CC1=CC=CC=C1)C1CCNC1</chem></p> <p><b>Enamine ID</b><br/>           Z2444727652</p> <p><b>Enamine Q-Code</b><br/>           n/a</p>                      |  <p><b>Training SMILES</b><br/> <chem>CC(C)CN(Cc1ccccc1)C2CCNCC2</chem></p> <p><b>ChEMBL ID</b><br/>           CHEMBL207837</p> <p><b>Tanimoto Similarity</b><br/>           0.333</p>              |
|  <p><b>Cluster SMILES</b><br/> <chem>CN(C)C1=CC=C(F)C=C1CNCC1(O)CC2=CC=CC=C2C1</chem></p> <p><b>Enamine ID</b><br/>           Z2769565776</p> <p><b>Enamine Q-Code</b><br/>           Q754914\$1</p>        |  <p><b>Training SMILES</b><br/> <chem>CNC[C@]1(O)Cc2ccc2[C@@H]1Oc3ccc(F)cc3C</chem></p> <p><b>ChEMBL ID</b><br/>           CHEMBL506137</p> <p><b>Tanimoto Similarity</b><br/>           0.245</p> |
|  <p><b>Cluster SMILES</b><br/> <chem>CC(N[C@H]1C[C@H](C2=CC=C(Cl)C(Cl)=C2)C1)C1CCOCC1</chem></p> <p><b>Enamine ID</b><br/>           Z1986623199</p> <p><b>Enamine Q-Code</b><br/>           Q754932\$4</p> |  <p><b>Training SMILES</b><br/> <chem>CN1CCCC(C1)c2ccc(Cl)c(Cl)c2</chem></p> <p><b>ChEMBL ID</b><br/>           CHEMBL2326691</p> <p><b>Tanimoto Similarity</b><br/>           0.311</p>           |

|                                                                                     |                                                                                                                                                                                          |                                                                                      |                                                                                                                                                                                            |
|-------------------------------------------------------------------------------------|------------------------------------------------------------------------------------------------------------------------------------------------------------------------------------------|--------------------------------------------------------------------------------------|--------------------------------------------------------------------------------------------------------------------------------------------------------------------------------------------|
| 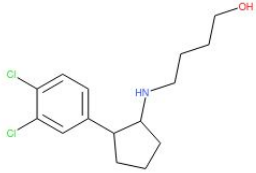   | <p><b>Cluster SMILES</b></p> <chem>OCCCCNC1CCCC1C1=CC=C(Cl)C(Cl)=C1</chem> <p><b>Enamine ID</b></p> <p>Z1904820040</p> <p><b>Enamine Q-Code</b></p> <p>Q754913\$15</p>                   |    | <p><b>Training SMILES</b></p> <chem>Clc1ccc(cc1Cl)[C@@H]2CCCCN3CCCC[C@@H]23</chem> <p><b>ChEMBL ID</b></p> <p>CHEMBL559186</p> <p><b>Tanimoto Similarity</b></p> <p>0.320</p>              |
|   | <p><b>Cluster SMILES</b></p> <chem>CCOC(CN1CC=C(C2=C[NH]C3=CC(F)=CC=C23)CC1)C1CC1</chem> <p><b>Enamine ID</b></p> <p>PV-001918160326</p> <p><b>Enamine Q-Code</b></p> <p>Q754917\$41</p> |    | <p><b>Training SMILES</b></p> <chem>COc1cccc2c(coc12)C(C)CN3CCC(=CC3)c4c[nH]c5cc(F)ccc45</chem> <p><b>ChEMBL ID</b></p> <p>CHEMBL597479</p> <p><b>Tanimoto Similarity</b></p> <p>0.500</p> |
|  | <p><b>Cluster SMILES</b></p> <chem>FC1=CC=CC([C@@H]2CCNC[C@@H]2NCC2=CC=C3OCCOC3=C2)=C1</chem> <p><b>Enamine ID</b></p> <p>Z2569757498</p> <p><b>Enamine Q-Code</b></p> <p>Q754942\$4</p> |  | <p><b>Training SMILES</b></p> <chem>CNC(C)Cc1ccc2OCCOc2c1</chem> <p><b>ChEMBL ID</b></p> <p>CHEMBL3603954</p> <p><b>Tanimoto Similarity</b></p> <p>0.287</p>                               |
|  | <p><b>Cluster SMILES</b></p> <chem>OC(CNC(C1=CC=C(F)C(Cl)=C1)C1CC1)COC1=CC=CC2=C1C=C[NH]2</chem> <p><b>Enamine ID</b></p> <p>PV-001919825446</p> <p><b>Enamine Q-Code</b></p> <p>n/a</p> |  | <p><b>Training SMILES</b></p> <chem>CC(COc1ccc2OCC(=O)Nc2c1)NCC(O)COc3cccc4[nH]ccc34</chem> <p><b>ChEMBL ID</b></p> <p>CHEMBL183921</p> <p><b>Tanimoto Similarity</b></p> <p>0.397</p>     |

|                                                                                     |                                                                                                                                                                                        |                                                                                      |                                                                                                                                                                                     |
|-------------------------------------------------------------------------------------|----------------------------------------------------------------------------------------------------------------------------------------------------------------------------------------|--------------------------------------------------------------------------------------|-------------------------------------------------------------------------------------------------------------------------------------------------------------------------------------|
| 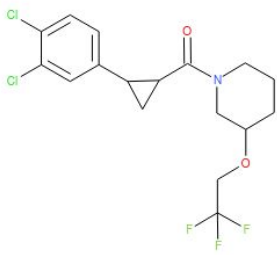   | <p><b>Cluster SMILES</b><br/> <chem>O=C(C1CC1C1=CC=C(Cl)C(Cl)=C1)N1CCC(OCC(F)(F)F)C1</chem></p> <p><b>Enamine ID</b><br/> Z1083362508</p> <p><b>Enamine Q-Code</b><br/> Q754940\$2</p> |    | <p><b>Training SMILES</b><br/> <chem>COC(=O)[C@@H]1CN(C)CC[C@@H]1c2ccc(Cl)c(Cl)c2</chem></p> <p><b>ChEMBL ID</b><br/> CHEMBL397490</p> <p><b>Tanimoto Similarity</b><br/> 0.333</p> |
|    | <p><b>Cluster SMILES</b><br/> <chem>CC(C)(CNCCC1CCO(C1)C1=CC=C(Cl)C(Cl)=C1)C1</chem></p> <p><b>Enamine ID</b><br/> Z1783772638</p> <p><b>Enamine Q-Code</b><br/> Q754928\$34</p>       |    | <p><b>Training SMILES</b><br/> <chem>CC(=O)NCC[C@@H]1CNCCO[C@H]1c2ccc(Cl)c(Cl)c2</chem></p> <p><b>ChEMBL ID</b><br/> CHEMBL3593401</p> <p><b>Tanimoto Similarity</b><br/> 0.206</p> |
|  | <p><b>Cluster SMILES</b><br/> <chem>CC1(CN2CCOC(C3=CC=C(Cl)C(Cl)=C3)C2)CCNC1</chem></p> <p><b>Enamine ID</b><br/> Z2444828348</p> <p><b>Enamine Q-Code</b><br/> Q754918\$1</p>         |  | <p><b>Training SMILES</b><br/> <chem>Clc1ccc(cc1Cl)[C@@H]2CCNC[C@@]23CCOC3</chem></p> <p><b>ChEMBL ID</b><br/> CHEMBL1173607</p> <p><b>Tanimoto Similarity</b><br/> 0.286</p>       |
|  | <p><b>Cluster SMILES</b><br/> <chem>CC(C)(CNCC1CCCO(C1)C1=CC=C2C=CC=CC2=C1)C1</chem></p> <p><b>Enamine ID</b><br/> Z2698567135</p> <p><b>Enamine Q-Code</b><br/> Q905064\$2</p>        |  | <p><b>Training SMILES</b><br/> <chem>CNCC1CC1c2ccc3ccc3c2</chem></p> <p><b>ChEMBL ID</b><br/> CHEMBL249331</p> <p><b>Tanimoto Similarity</b><br/> 0.253</p>                         |

|                                                                                     |                                                                                                                                                                                                |                                                                                      |                                                                                                                                                                                     |
|-------------------------------------------------------------------------------------|------------------------------------------------------------------------------------------------------------------------------------------------------------------------------------------------|--------------------------------------------------------------------------------------|-------------------------------------------------------------------------------------------------------------------------------------------------------------------------------------|
| 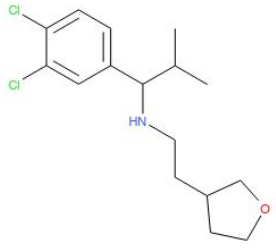   | <p><b>Cluster SMILES</b><br/> <chem>CC(C)C(NCCC1CCO C1)C1=CC=C(Cl)C(Cl)=C1</chem></p> <p><b>Enamine ID</b><br/> Z1663514926</p> <p><b>Enamine Q-Code</b><br/> Q754931\$3</p>                   |    | <p><b>Training SMILES</b><br/> <chem>CC(C1CCNCC1)c2cc c(Cl)c(Cl)c2</chem></p> <p><b>ChEMBL ID</b><br/> CHEMBL2407334</p> <p><b>Tanimoto Similarity</b><br/> 0.288</p>               |
|    | <p><b>Cluster SMILES</b><br/> <chem>C#CCCNCC1CCCN1 C(=O)C1=CC=CC2=C 1OCC2(C)C</chem></p> <p><b>Enamine ID</b><br/> PV-000916662553</p> <p><b>Enamine Q-Code</b><br/> n/a</p>                   |    | <p><b>Training SMILES</b><br/> <chem>COC(=O)[C@@H] ([ C@H]1CCCCN1CC# C)c2ccccc2</chem></p> <p><b>ChEMBL ID</b><br/> CHEMBL1254282</p> <p><b>Tanimoto Similarity</b><br/> 0.168</p>  |
|  | <p><b>Cluster SMILES</b><br/> <chem>CCN1CCC(N[C@@H] ]2CCO[C@H]2C2=C C=C(Cl)C(F)=C2)C1= O</chem></p> <p><b>Enamine ID</b><br/> PV-001921689112</p> <p><b>Enamine Q-Code</b><br/> Q754922\$1</p> |  | <p><b>Training SMILES</b><br/> <chem>Fc1cc(ccc1Cl)[C@@ H]2OCCNC[C@H]2 CN3CCCC3=O</chem></p> <p><b>ChEMBL ID</b><br/> CHEMBL3818953</p> <p><b>Tanimoto Similarity</b><br/> 0.347</p> |
|  | <p><b>Cluster SMILES</b><br/> <chem>ClC1=CC=CC(C2=NC (CN(C3CC3)C3CCNC 3)=CO2)=C1</chem></p> <p><b>Enamine ID</b><br/> Z2447436630</p> <p><b>Enamine Q-Code</b><br/> Q754948\$1</p>             |  | <p><b>Training SMILES</b><br/> <chem>Clc1cccc(CN(C2CCO CC2) [C@H]3CCNC3 )c1Cl</chem></p> <p><b>ChEMBL ID</b><br/> CHEMBL245880</p> <p><b>Tanimoto Similarity</b><br/> 0.333</p>     |

|                                                                                     |                                                                                                                                                                                           |                                                                                      |                                                                                                                                                                                             |
|-------------------------------------------------------------------------------------|-------------------------------------------------------------------------------------------------------------------------------------------------------------------------------------------|--------------------------------------------------------------------------------------|---------------------------------------------------------------------------------------------------------------------------------------------------------------------------------------------|
| 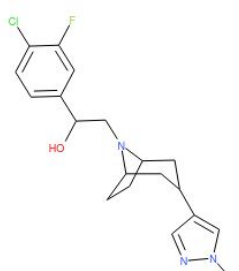   | <p><b>Cluster SMILES</b></p> <chem>CN1C=C(C2CC3CCC(C2)N3CC(O)C2=CC=C(Cl)C(F)=C2)C=N1</chem> <p><b>Enamine ID</b></p> <p>Z2843312692</p> <p><b>Enamine Q-Code</b></p> <p>Q754923\$6</p>    |    | <p><b>Training SMILES</b></p> <chem>OC(CN1C2CCCC1CC(C2)c3cccc3)c4ccc(Cl)c(Cl)c4</chem> <p><b>ChEMBL ID</b></p> <p>CHEMBL127013</p> <p><b>Tanimoto Similarity</b></p> <p>0.476</p>           |
|    | <p><b>Cluster SMILES</b></p> <chem>FC1=CC=CC(CCN2CCCN(C3=C(Cl)C=CC=C3Cl)CC2)=C1</chem> <p><b>Enamine ID</b></p> <p>PV-001918950467</p> <p><b>Enamine Q-Code</b></p> <p>Q754934\$8</p>     |    | <p><b>Training SMILES</b></p> <chem>Fc1cccc(CCN2CCCC2)c1</chem> <p><b>ChEMBL ID</b></p> <p>CHEMBL2030636</p> <p><b>Tanimoto Similarity</b></p> <p>0.561</p>                                 |
|  | <p><b>Cluster SMILES</b></p> <chem>CC1(C2=CC=CC(Cl)=C2)CCN(CC(O)COC2=CC=CC3=C2C=C[NH]3)CC1</chem> <p><b>Enamine ID</b></p> <p>PV-001919382948</p> <p><b>Enamine Q-Code</b></p> <p>n/a</p> |  | <p><b>Training SMILES</b></p> <chem>O[C@H](COc1cccc2[nH]ccc12)CN3CCC(CC3)c4cc5cc(Cl)ccc5s4</chem> <p><b>ChEMBL ID</b></p> <p>CHEMBL56303</p> <p><b>Tanimoto Similarity</b></p> <p>0.505</p> |
|  | <p><b>Cluster SMILES</b></p> <chem>CCC1=CC=C(N2CCN(CC(O)COC3=CC=CC4=C3C=C[NH]4)CC2)C=C1Cl</chem> <p><b>Enamine ID</b></p> <p>PV-001919716605</p> <p><b>Enamine Q-Code</b></p> <p>n/a</p>  |  | <p><b>Training SMILES</b></p> <chem>O[C@H](COc1cccc2[nH]ccc12)CN3CCC(CC3)c4cc5c(Cl)cccc5s4</chem> <p><b>ChEMBL ID</b></p> <p>CHEMBL57296</p> <p><b>Tanimoto Similarity</b></p> <p>0.495</p> |

|                                                                                     |                                                                                                                                                                                 |                                                                                      |                                                                                                                                                                                     |
|-------------------------------------------------------------------------------------|---------------------------------------------------------------------------------------------------------------------------------------------------------------------------------|--------------------------------------------------------------------------------------|-------------------------------------------------------------------------------------------------------------------------------------------------------------------------------------|
| 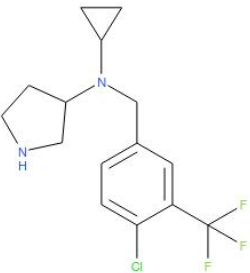   | <p><b>Cluster SMILES</b><br/> <chem>FC(F)(F)C1=CC(CN(C2CC2)C2CCNC2)=CC=C1Cl</chem></p> <p><b>Enamine ID</b><br/> Z2444770829</p> <p><b>Enamine Q-Code</b><br/> n/a</p>          |    | <p><b>Training SMILES</b><br/> <chem>Clc1ccc(CN(C2CC2)C3CNC3)cc1Cl</chem></p> <p><b>ChEMBL ID</b><br/> CHEMBL3331484</p> <p><b>Tanimoto Similarity</b><br/> 0.469</p>               |
|    | <p><b>Cluster SMILES</b><br/> <chem>ClC1=CC=C(CCC2=NC(C3CCNCC3)=NO2)C=C1Cl</chem></p> <p><b>Enamine ID</b><br/> Z2445178480</p> <p><b>Enamine Q-Code</b><br/> n/a</p>           |    | <p><b>Training SMILES</b><br/> <chem>Fc1ccc(OCC2CCC(Cl)c(Cl)c2)c(c1)C3CCNCC3</chem></p> <p><b>ChEMBL ID</b><br/> CHEMBL573971</p> <p><b>Tanimoto Similarity</b><br/> 0.318</p>      |
|  | <p><b>Cluster SMILES</b><br/> <chem>ClC1=CC=C(OCC2=NC(C3CCNCC3)=N2)C=C1Cl</chem></p> <p><b>Enamine ID</b><br/> Z2617873335</p> <p><b>Enamine Q-Code</b><br/> Q805275\$4</p>     |  | <p><b>Training SMILES</b><br/> <chem>Clc1cccc(O[C@@H]([C@@H]2CCNC2)c3ccccc3)c1Cl</chem></p> <p><b>ChEMBL ID</b><br/> CHEMBL2337603</p> <p><b>Tanimoto Similarity</b><br/> 0.293</p> |
|  | <p><b>Cluster SMILES</b><br/> <chem>CC(C1=CC=C(Cl)C(Cl)=C1)N1C=C(C2CCNC2)N=N1</chem></p> <p><b>Enamine ID</b><br/> Z2846041003</p> <p><b>Enamine Q-Code</b><br/> Q754915\$3</p> |  | <p><b>Training SMILES</b><br/> <chem>CC(C1CCNCC1)c2cc(Cl)c(Cl)c2</chem></p> <p><b>ChEMBL ID</b><br/> CHEMBL2407334</p> <p><b>Tanimoto Similarity</b><br/> 0.312</p>                 |

|  |                                                                                                                                                                                           |  |                                                                                                                                                                                      |
|--|-------------------------------------------------------------------------------------------------------------------------------------------------------------------------------------------|--|--------------------------------------------------------------------------------------------------------------------------------------------------------------------------------------|
|  | <p><b>Cluster SMILES</b><br/> <chem>CCC1(C(=O)N2CC=C(C3=C[NH]C4=CC(F)=CC=C34)CC2)CCCN1</chem></p> <p><b>Enamine ID</b><br/> Z2488796202</p> <p><b>Enamine Q-Code</b><br/> Q754937\$42</p> |  | <p><b>Training SMILES</b><br/> <chem>Fc1ccc2c(c[nH]c2c1)C3=CCN(CCc4coc5ccccc45)CC3</chem></p> <p><b>ChEMBL ID</b><br/> CHEMBL599985</p> <p><b>Tanimoto Similarity</b><br/> 0.387</p> |
|  | <p><b>Cluster SMILES</b><br/> <chem>CCCN(C(=O)C1=CC=CC=C1OCC1CC1)C1CCNC1</chem></p> <p><b>Enamine ID</b><br/> Z2354724931</p> <p><b>Enamine Q-Code</b><br/> n/a</p>                       |  | <p><b>Training SMILES</b><br/> <chem>COc1cc(CCN2CCN(CCCc3ccccc3)CC2)c(cc1OCC4CCCC4</chem></p> <p><b>ChEMBL ID</b><br/> CHEMBL551471</p> <p><b>Tanimoto Similarity</b><br/> 0.557</p> |
|  | <p><b>Cluster SMILES</b><br/> <chem>CCCNCC1(C)CCN(C(=O)C2=C[NH]C3=CC=C(F)C=C23)C1</chem></p> <p><b>Enamine ID</b><br/> PV-000923491934</p> <p><b>Enamine Q-Code</b><br/> n/a</p>          |  | <p><b>Training SMILES</b><br/> <chem>OCCNCCc1c[nH]c2c(cc(F)cc12</chem></p> <p><b>ChEMBL ID</b><br/> CHEMBL2347166</p> <p><b>Tanimoto Similarity</b><br/> 0.266</p>                   |
|  | <p><b>Cluster SMILES</b><br/> <chem>CCN(CC1(C2=CC=C(Cl)C(Cl)=C2)CCC1)C1CC1</chem></p> <p><b>Enamine ID</b><br/> PV-001917796783</p> <p><b>Enamine Q-Code</b><br/> n/a</p>                 |  | <p><b>Training SMILES</b><br/> <chem>CN(C)CC1(CCC1)c2c(cc(Cl)c(Cl)c2</chem></p> <p><b>ChEMBL ID</b><br/> CHEMBL1683883</p> <p><b>Tanimoto Similarity</b><br/> 0.596</p>              |



|                                                                                     |                                                                                                                                                                                     |                                                                                                                                                                                                                                                                        |
|-------------------------------------------------------------------------------------|-------------------------------------------------------------------------------------------------------------------------------------------------------------------------------------|------------------------------------------------------------------------------------------------------------------------------------------------------------------------------------------------------------------------------------------------------------------------|
| 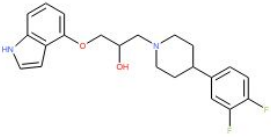   | <p><b>Cluster SMILES</b><br/> <chem>OC(COC1=CC=CC2=C1C=C[NH]2)CN1CCC(C2=CC=C(F)C(F)=C2)CC1</chem></p> <p><b>Enamine ID</b><br/>Z1421251686</p> <p><b>Enamine Q-Code</b><br/>n/a</p> | <p><b>Training SMILES</b><br/> <chem>O[C@H](COc1cccc2[nH]ccc12)CN3CCCC(C3)c4cc5c(F)cccc5s4</chem></p> <p><b>ChEMBL ID</b><br/>CHEMBL301677</p> <p><b>Tanimoto Similarity</b><br/>0.616</p>                                                                             |
|    | <p><b>Cluster SMILES</b><br/> <chem>O=C(CCC1CCNC1)N1CCOC(C2=CC=C(Cl)C(Cl)=C2)C1</chem></p> <p><b>Enamine ID</b><br/>Z2436746713</p> <p><b>Enamine Q-Code</b><br/>Q754947\$2</p>     |  <p><b>Training SMILES</b><br/> <chem>NC(=O)[C@@H]1CNCCO[C@H]1c2ccc(Cl)c(Cl)c2</chem></p> <p><b>ChEMBL ID</b><br/>CHEMBL3593397</p> <p><b>Tanimoto Similarity</b><br/>0.308</p>      |
|  | <p><b>Cluster SMILES</b><br/> <chem>ClC1=CC=C(C2CCCC2NC[C@@H]2CCCC2)C=C1Cl</chem></p> <p><b>Enamine ID</b><br/>PV-001930327687</p> <p><b>Enamine Q-Code</b><br/>n/a</p>             |  <p><b>Training SMILES</b><br/> <chem>Clc1ccc(cc1Cl)[C@H]2CCCN3CCCC[C@@H]23</chem></p> <p><b>ChEMBL ID</b><br/>CHEMBL556365</p> <p><b>Tanimoto Similarity</b><br/>0.308</p>        |
|  | <p><b>Cluster SMILES</b><br/> <chem>CCC1CC(NCC(C)(C)C2=CC=C(Cl)C(Cl)=C2)CCO1</chem></p> <p><b>Enamine ID</b><br/>PV-001923897672</p> <p><b>Enamine Q-Code</b><br/>Q754950\$3</p>    |  <p><b>Training SMILES</b><br/> <chem>CCN[C@@H]1C[C@@H](c2ccc(Cl)c(Cl)c2)c3ccccc13</chem></p> <p><b>ChEMBL ID</b><br/>CHEMBL147983</p> <p><b>Tanimoto Similarity</b><br/>0.216</p> |

|                                                                                     |                                                                                                                                                                                       |                                                                                      |                                                                                                                                                                                |
|-------------------------------------------------------------------------------------|---------------------------------------------------------------------------------------------------------------------------------------------------------------------------------------|--------------------------------------------------------------------------------------|--------------------------------------------------------------------------------------------------------------------------------------------------------------------------------|
| 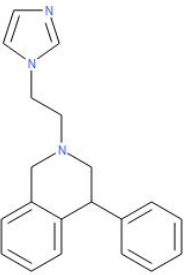   | <p><b>Cluster SMILES</b></p> <chem>C1=CC=C(C2CN(CC3C=CN=C3)CC3=C(C=CC=C32)C=C1</chem> <p><b>Enamine ID</b></p> <p>Z1505378916</p> <p><b>Enamine Q-Code</b></p> <p>n/a</p>             |    | <p><b>Training SMILES</b></p> <chem>CCN1CC(c2ccccc2)c3ccccc3C1</chem> <p><b>ChEMBL ID</b></p> <p>CHEMBL286455</p> <p><b>Tanimoto Similarity</b></p> <p>0.529</p>               |
|    | <p><b>Cluster SMILES</b></p> <chem>OCC(NC1CCN(CC2=CC=CC=C2Cl)CC1)C1=CC=C(Br)C(F)=C1</chem> <p><b>Enamine ID</b></p> <p>Z2201777668</p> <p><b>Enamine Q-Code</b></p> <p>Q754941\$1</p> |    | <p><b>Training SMILES</b></p> <chem>COc1ccc(Br)c(CC2CCN(CC3CCCCC3Cl)C(C2)c1</chem> <p><b>ChEMBL ID</b></p> <p>CHEMBL3913057</p> <p><b>Tanimoto Similarity</b></p> <p>0.267</p> |
|  | <p><b>Cluster SMILES</b></p> <chem>CC1CC(CN(CCO)CC2=CC=C(Cl)C(Cl)=C2)C1</chem> <p><b>Enamine ID</b></p> <p>PV-001918897538</p> <p><b>Enamine Q-Code</b></p> <p>Q754938\$4</p>         |  | <p><b>Training SMILES</b></p> <chem>CC(C)N(CC1CNC1)C2CCC(Cl)c(Cl)c2</chem> <p><b>ChEMBL ID</b></p> <p>CHEMBL3331503</p> <p><b>Tanimoto Similarity</b></p> <p>0.557</p>         |
|  | <p><b>Cluster SMILES</b></p> <chem>ClC1=CC=C(C2CN(C[C@@H]3C[C@H]3CC3)CCO2)C=C1</chem> <p><b>Enamine ID</b></p> <p>PV-001917367008</p> <p><b>Enamine Q-Code</b></p> <p>Q754916\$4</p>  |  | <p><b>Training SMILES</b></p> <chem>NCC1C2CCC(C2)C1c3ccc(Cl)c(Cl)c3</chem> <p><b>ChEMBL ID</b></p> <p>CHEMBL172523</p> <p><b>Tanimoto Similarity</b></p> <p>0.262</p>          |

|  |                                                                                                                                                                                               |  |                                                                                                                                                                                                |
|--|-----------------------------------------------------------------------------------------------------------------------------------------------------------------------------------------------|--|------------------------------------------------------------------------------------------------------------------------------------------------------------------------------------------------|
|  | <p><b>Cluster SMILES</b><br/> <chem>CC(C)(CNC(=O)NCC1CNCCO1)C1=CC=C(Cl)C(Cl)=C1</chem></p> <p><b>Enamine ID</b><br/> Z2361435743</p> <p><b>Enamine Q-Code</b><br/> Q754949\$3</p>             |  | <p><b>Training SMILES</b><br/> <chem>CC(=O)NCC[C@@H]1CNCCO[C@H]1c2ccc(Cl)c(Cl)c2</chem></p> <p><b>ChEMBL ID</b><br/> CHEMBL3593401</p> <p><b>Tanimoto Similarity</b><br/> 0.326</p>            |
|  | <p><b>Cluster SMILES</b><br/> <chem>OC(COC1=CC=CC=C1F)CN1CC=C(C2=C[NH]C3=CC(F)=CC=C23)CC1</chem></p> <p><b>Enamine ID</b><br/> Z1485114833</p> <p><b>Enamine Q-Code</b><br/> Q754935\$2</p>   |  | <p><b>Training SMILES</b><br/> <chem>COC1CCCC2C(coc12)C(C)CN3CCCC(=CC3)c4c[nH]c5cc(F)ccc45</chem></p> <p><b>ChEMBL ID</b><br/> CHEMBL597479</p> <p><b>Tanimoto Similarity</b><br/> 0.491</p>   |
|  | <p><b>Cluster SMILES</b><br/> <chem>OC(CNCC1CSC2=CC=CC=C2O1)C1=CC=C(F)C(F)=C1</chem></p> <p><b>Enamine ID</b><br/> Z3045122589</p> <p><b>Enamine Q-Code</b><br/> Q754924\$1</p>               |  | <p><b>Training SMILES</b><br/> <chem>CN1[C@@H]2CC[C@H]1C[C@H](C2)OC(c3ccccc3)c4ccc(F)c(F)c4</chem></p> <p><b>ChEMBL ID</b><br/> CHEMBL3084908</p> <p><b>Tanimoto Similarity</b><br/> 0.196</p> |
|  | <p><b>Cluster SMILES</b><br/> <chem>CC1=CC(Cl)=CC=C1OC1=CC=C(F)C=C1CN[C@H]1C[C@H](O)C1</chem></p> <p><b>Enamine ID</b><br/> PV-001926691632</p> <p><b>Enamine Q-Code</b><br/> Q753945\$26</p> |  | <p><b>Training SMILES</b><br/> <chem>CNCc1cc(ccc1Oc2cc(Cl)cc2C)C(=O)N</chem></p> <p><b>ChEMBL ID</b><br/> CHEMBL401819</p> <p><b>Tanimoto Similarity</b><br/> 0.388</p>                        |

|                                                                                     |                                                                                                                                                                                                          |                                                                                                                                                                                                                                                                                           |
|-------------------------------------------------------------------------------------|----------------------------------------------------------------------------------------------------------------------------------------------------------------------------------------------------------|-------------------------------------------------------------------------------------------------------------------------------------------------------------------------------------------------------------------------------------------------------------------------------------------|
| 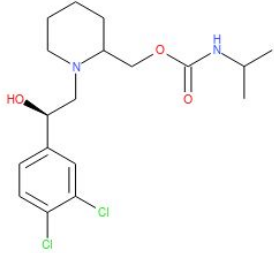   | <p><b>Cluster SMILES</b></p> <chem>CC(C)NC(=O)OCC1C<br/>CCCN1C[C@H](O)C<br/>1=CC=C(Cl)C(Cl)=C1</chem> <p><b>Enamine ID</b></p> <p>PV-001919611983</p> <p><b>Enamine Q-Code</b></p> <p>Q754930\$6</p>     |  <p><b>Training SMILES</b></p> <chem>COC(=O)[C@@H]([C@H]1CCCCN1Cc2<br/>cccc2)c3ccc(Cl)c(Cl)<br/>)c3</chem> <p><b>ChEMBL ID</b></p> <p>CHEMBL1254674</p> <p><b>Tanimoto Similarity</b></p> <p>0.314</p>  |
|    | <p><b>Cluster SMILES</b></p> <chem>OC(CNC1CCN(C2=C<br/>C=C(Cl)C=C2F)C1)C<br/>1=CC=CC(F)=C1</chem> <p><b>Enamine ID</b></p> <p>Z2722622816</p> <p><b>Enamine Q-Code</b></p> <p>Q754933\$1</p>             |  <p><b>Training SMILES</b></p> <chem>CNC[C@@H](O)[C@H]([C@H](N1CCc2cc(C<br/>l)ccc12)c3cccc(F)c3</chem> <p><b>ChEMBL ID</b></p> <p>CHEMBL598168</p> <p><b>Tanimoto Similarity</b></p> <p>0.327</p>       |
|  | <p><b>Cluster SMILES</b></p> <chem>CCCN(CC1=CC=C(F)<br/>C=C1C(F)(F)F)C1CC<br/>NCC1</chem> <p><b>Enamine ID</b></p> <p>Z2444696415</p> <p><b>Enamine Q-Code</b></p> <p>n/a</p>                            |  <p><b>Training SMILES</b></p> <chem>CCCN(Cc1ccc(F)cc1<br/>C(F)(F)F)C2CCNCC2.<br/>OC(=O)\C=C\C(=O)O</chem> <p><b>ChEMBL ID</b></p> <p>CHEMBL207854</p> <p><b>Tanimoto Similarity</b></p> <p>0.833</p> |
|  | <p><b>Cluster SMILES</b></p> <chem>O=C(C1=CN=C(C2C<br/>CNCC2)O1)N(CC1=<br/>CC=C(Cl)C(Cl)=C1)C<br/>1CC1</chem> <p><b>Enamine ID</b></p> <p>Z3100431738</p> <p><b>Enamine Q-Code</b></p> <p>Q754929\$5</p> |  <p><b>Training SMILES</b></p> <chem>Clc1ccc(CN(C2CC2)<br/>C3CNC3)cc1Cl</chem> <p><b>ChEMBL ID</b></p> <p>CHEMBL3331484</p> <p><b>Tanimoto Similarity</b></p> <p>0.341</p>                            |

|                                                                                   |                                                                                                                                                                                                                             |                                                                                                                                                                                                                                                                                    |
|-----------------------------------------------------------------------------------|-----------------------------------------------------------------------------------------------------------------------------------------------------------------------------------------------------------------------------|------------------------------------------------------------------------------------------------------------------------------------------------------------------------------------------------------------------------------------------------------------------------------------|
| 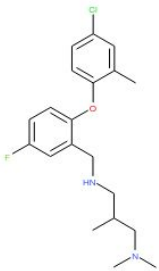 | <p><b>Cluster SMILES</b></p> <chem>CC1=CC(Cl)=CC=C1</chem><br><chem>OC1=CC=C(F)C=C1C</chem><br><chem>NCC(C)CN(C)C</chem><br><p><b>Enamine ID</b></p> <p>PV-001925822957</p> <p><b>Enamine Q-Code</b></p> <p>Q754951\$48</p> |  <p><b>Training SMILES</b></p> <chem>CNCc1cc(ccc1Oc2cc</chem><br><chem>c(Cl)cc2C)C(=O)N(C)C</chem><br><p><b>ChEMBL ID</b></p> <p>CHEMBL272493</p> <p><b>Tanimoto Similarity</b></p> <p>0.407</p> |
|  | <p><b>Cluster SMILES</b></p> <chem>CCCN(C(=O)C1=CC=C</chem><br><chem>C2[NH]C=CC2=C1)C</chem><br><chem>1CCNC1</chem><br><p><b>Enamine ID</b></p> <p>Z2488563933</p> <p><b>Enamine Q-Code</b></p> <p>Q754912\$22</p>          |  <p><b>Training SMILES</b></p> <chem>CCCN(C1CCNCC1)C(=</chem><br><chem>O)c2ccc3ccccc3c2</chem><br><p><b>ChEMBL ID</b></p> <p>CHEMBL565638</p> <p><b>Tanimoto Similarity</b></p> <p>0.434</p>     |

**Table S5. Single Point screen compounds and their inhibitory activity at 10  $\mu$ M.** Nisoxetine was set as the baseline 100% ( $pC_{50}$  of 8.0). These values correspond to Figure 8 in the main Manuscript. Data are reported as the mean (in %)  $\pm$  SEM of three individual experiments each performed in duplicate. Structures shown here might slightly deviate in orientation compared to the main manuscript.

| Enamine ID      | ID | Structure (based on SMILES)                                                          | Mean (%) | $\pm$ SEM |
|-----------------|----|--------------------------------------------------------------------------------------|----------|-----------|
| Nisoxetine      |    | 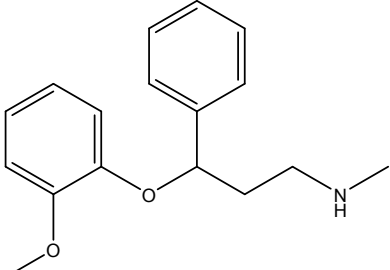    | 100      | 12        |
| PV-001921689112 | 01 |     | 8        | 9         |
| PV-001919611983 | 02 |   | 14       | 11        |
| PV-001917367008 | 03 |  | 7        | 9         |
| Z1083362508     | 04 |  | 19       | 15        |

|                 |    |                                                                                      |    |   |
|-----------------|----|--------------------------------------------------------------------------------------|----|---|
| Z1485114833     | 05 | 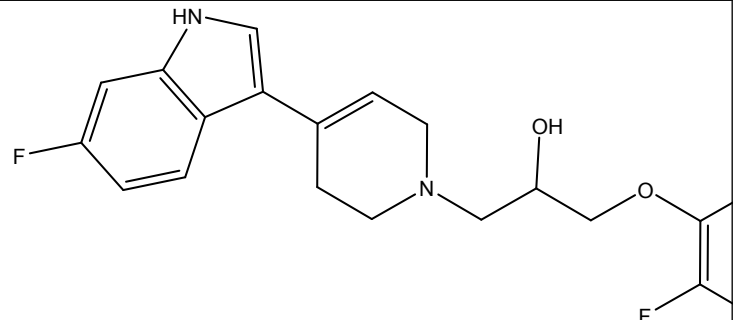   | 21 | 4 |
| PV-001918897538 | 06 |    | 32 | 3 |
| Z2843312692     | 07 |    | 53 | 7 |
| Z2444828348     | 08 |   | 58 | 4 |
| Z2722622816     | 09 |  | 10 | 7 |
| Z2769565776     | 10 |  | -4 | 3 |
| Z1986623199     | 11 |  | 15 | 5 |

|             |    |                                                                                      |     |    |
|-------------|----|--------------------------------------------------------------------------------------|-----|----|
| Z3045122589 | 12 | 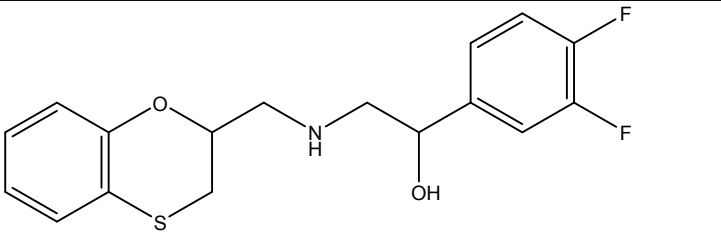   | 10  | 10 |
| Z2393213853 | 13 |    | 117 | 10 |
| Z2569757498 | 14 |   | 48  | 9  |
| Z2846041003 | 15 |  | 56  | 8  |
| Z3100431738 | 16 |  | 108 | 12 |
| Z2436746713 | 17 |  | 35  | 9  |



|                 |    |                                                                                      |     |    |
|-----------------|----|--------------------------------------------------------------------------------------|-----|----|
| Z1663514926     | 18 | 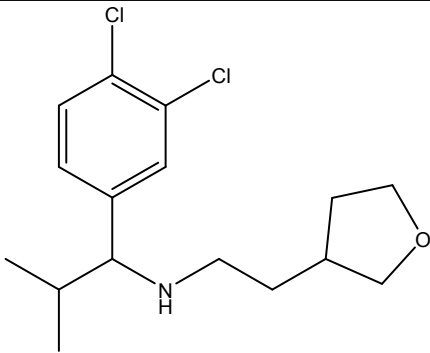    | 62  | 7  |
| Z2201777668     | 19 |    | 25  | 13 |
| Z2447436630     | 20 |   | 23  | 7  |
| PV-001918950467 | 21 |  | 21  | 7  |
| Z2488563933     | 22 |   | 117 | 5  |
| PV-001923897672 | 23 |  | 38  | 2  |

|                 |    |                                                                                      |     |    |
|-----------------|----|--------------------------------------------------------------------------------------|-----|----|
| Z1904820040     | 24 | 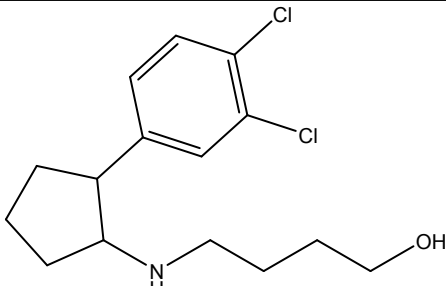    | 100 | 11 |
| PV-001926691632 | 25 |     | 19  | 6  |
| Z2488796202     | 26 |    | 11  | 10 |
| Z1783772638     | 27 |  | 52  | 8  |
| PV-001925822957 | 28 |  | 32  | 12 |

|                     |    |                                                                                      |     |    |
|---------------------|----|--------------------------------------------------------------------------------------|-----|----|
| Z2617873335         | 29 | 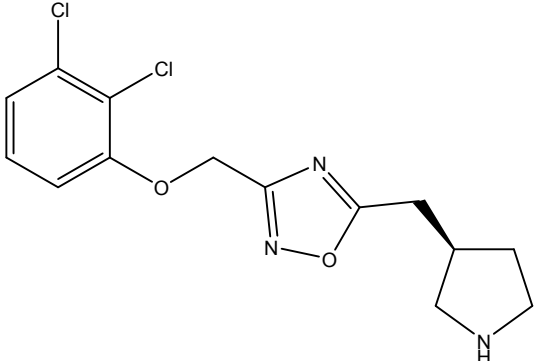    | 5   | 6  |
| PV-<br>001918160326 | 30 |    | -10 | 7  |
| Z2361435743         | 31 |  | 75  | 5  |
| Z2698567135         | 32 |  | 90  | 11 |

**S6. Analytical spectra for the 32 synthesized compounds selected for experimental follow-up. Data provided by Enamine.**

MaxPeak: 100.00%  
Ret\_Time: 1.248 min

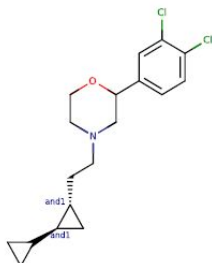

Mol Wt 340.29  
Exact Mass 339.16

| # | Time  | Area%  |
|---|-------|--------|
| 1 | 1.248 | 100.00 |

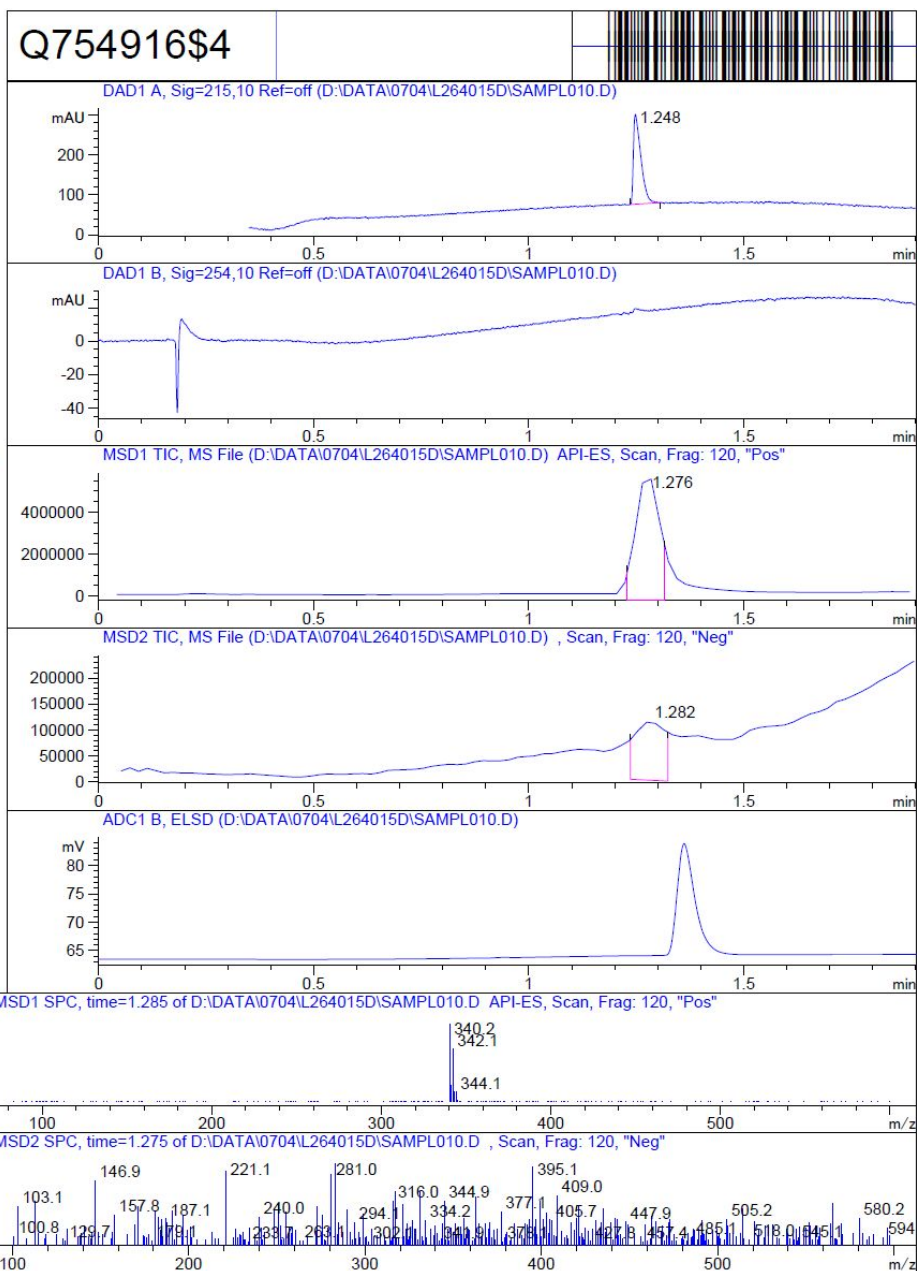

Enamine ID: PV-001917367008

MaxPeak: 96.65%  
Ret\_Time: 0.956 min

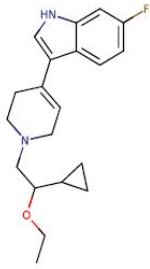

Mol Wt 328.42  
Exact Mass 328.24

| # | Time  | Area% |
|---|-------|-------|
| 1 | 0.956 | 96.65 |
| 2 | 0.986 | 3.35  |

Q754917\$41

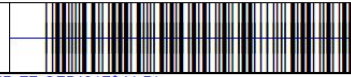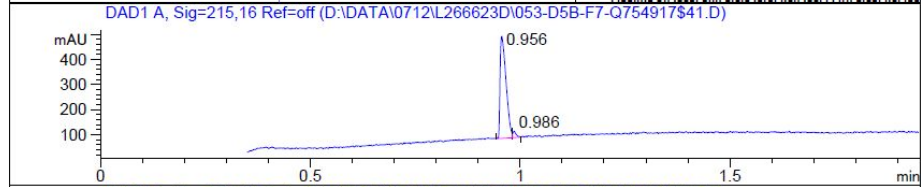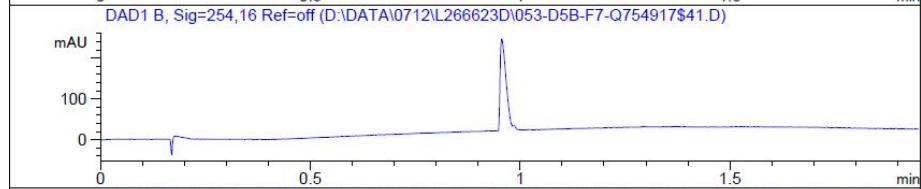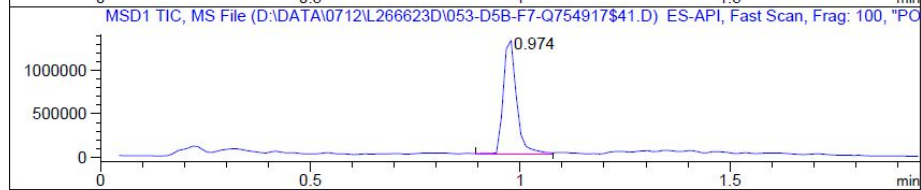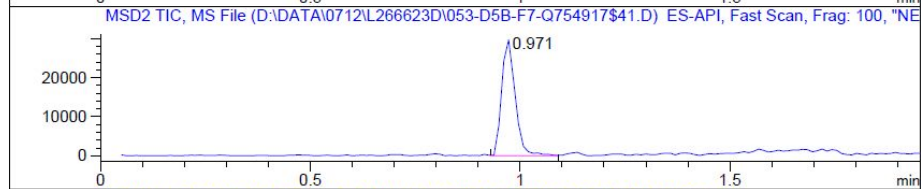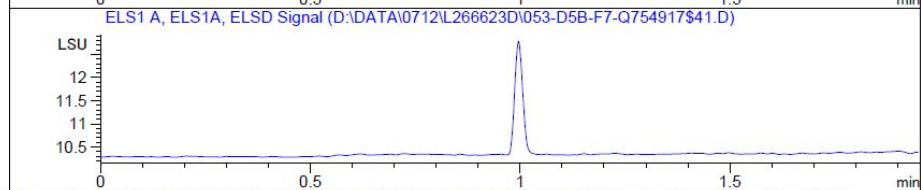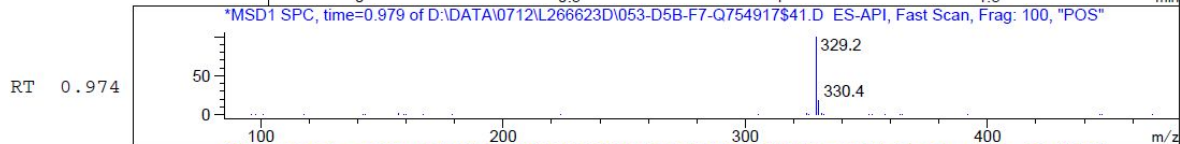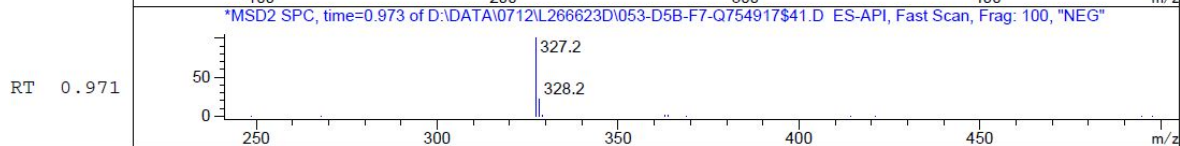

Enamine ID: PV-001918160326

MaxPeak: 100.00%  
Ret\_Time: 1.156 min

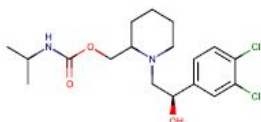

Mol Wt 389.32  
Exact Mass 388.17

| # | Time  | Area%  |
|---|-------|--------|
| 1 | 1.156 | 100.00 |

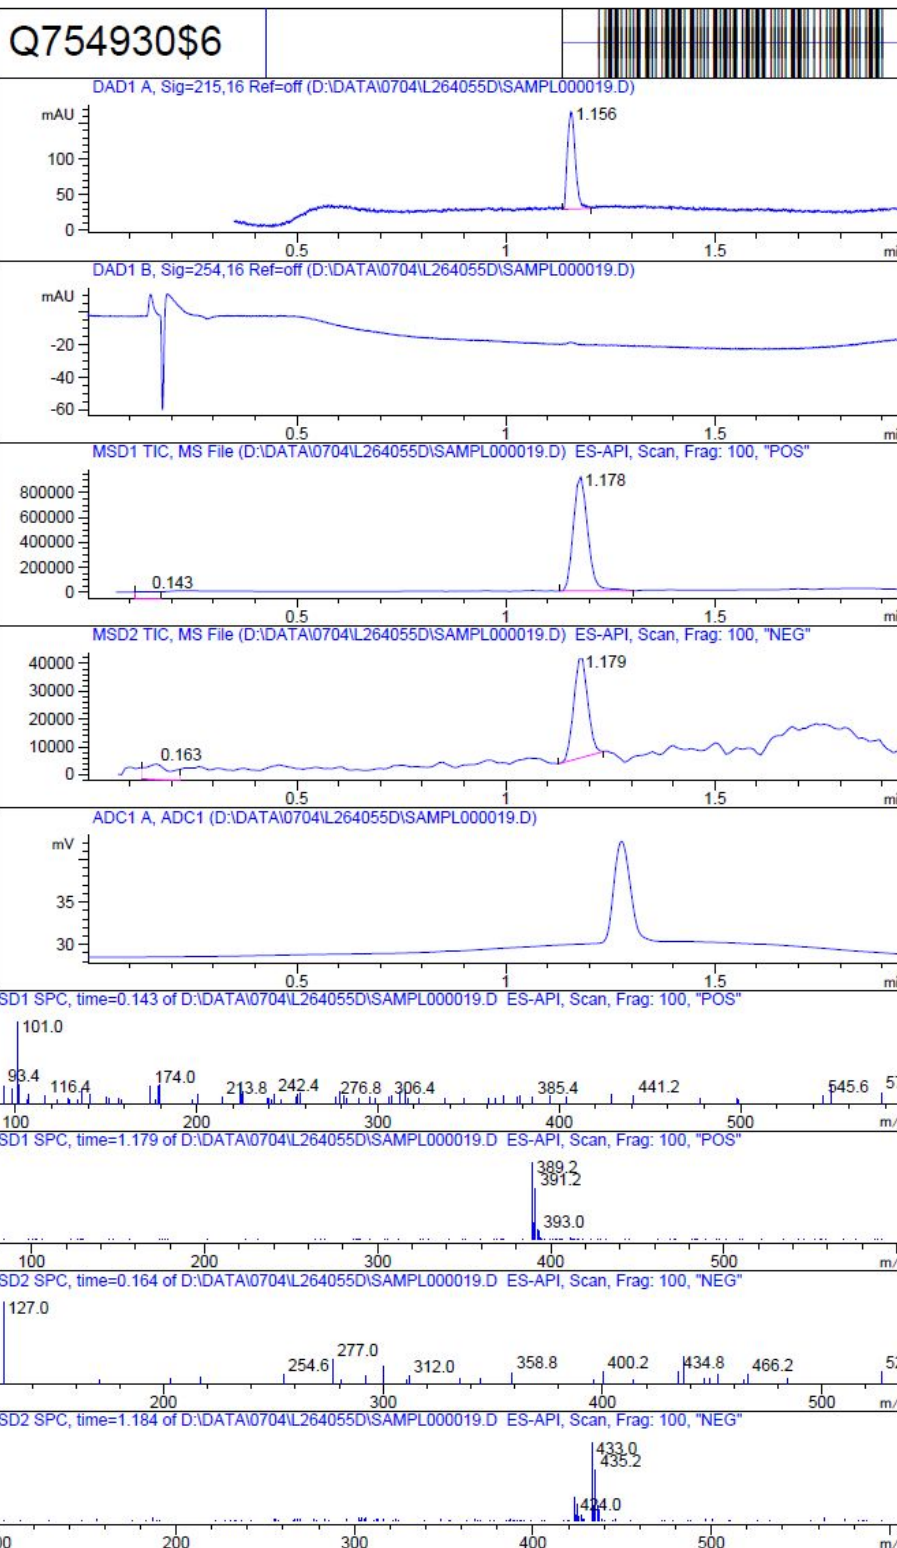

Enamine ID: PV-001919611983

MaxPeak: 96.42%  
Ret\_Time: 1.137 min

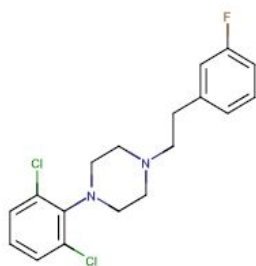

Mol Wt 353.26  
Exact Mass 352.13

| # | Time  | Area% |
|---|-------|-------|
| 1 | 0.889 | 1.30  |
| 2 | 1.137 | 96.42 |
| 3 | 1.194 | 2.28  |

Q754934\$8

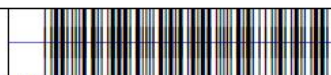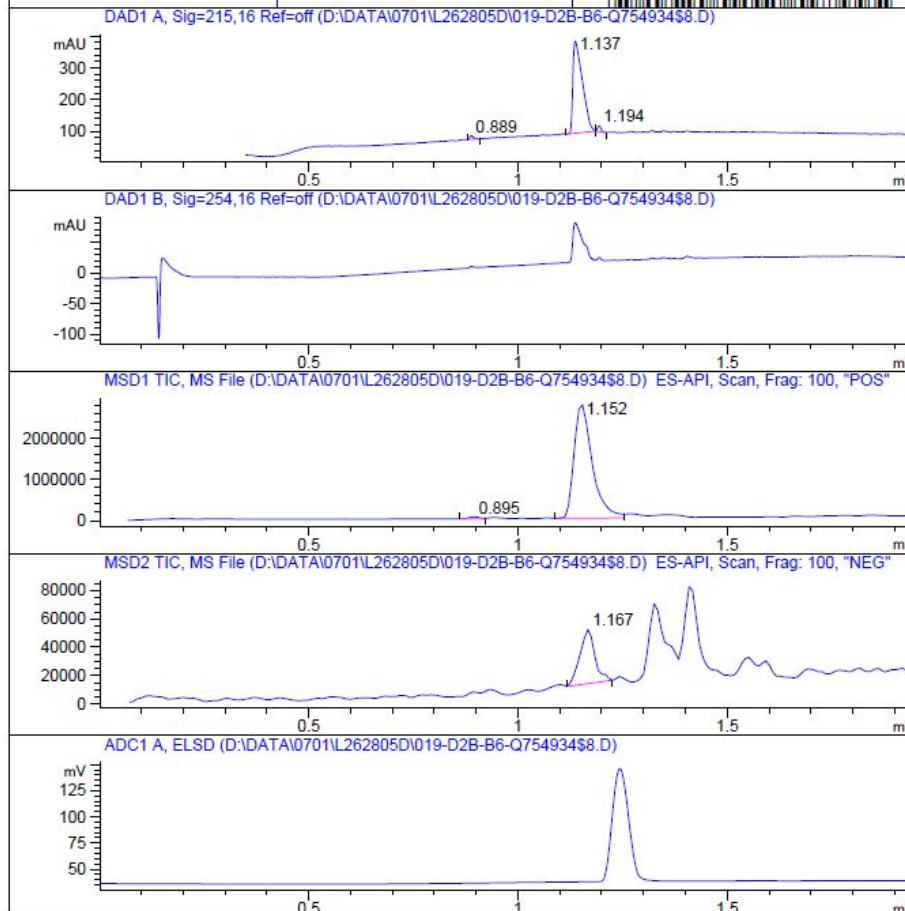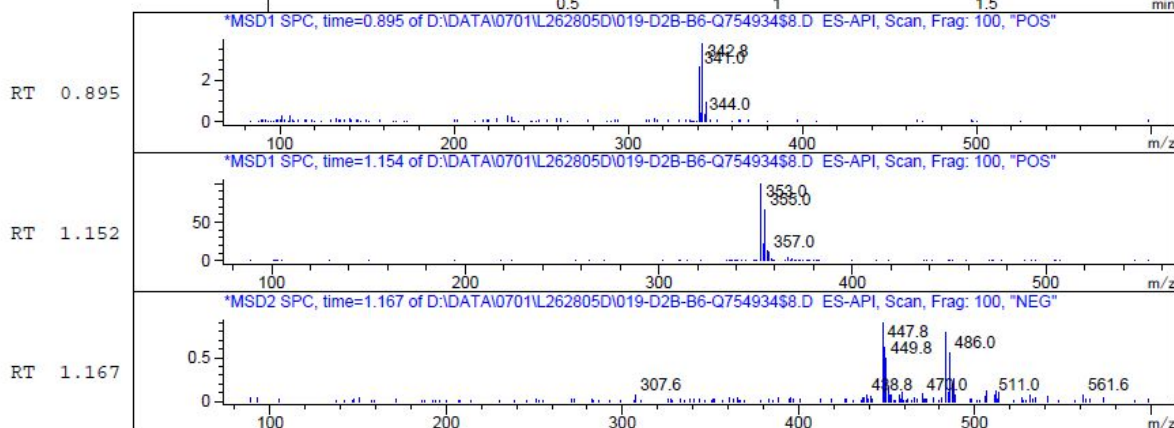

Enamine ID: PV-001918950467

MaxPeak: 100.00%  
Ret\_Time: 1.062 min

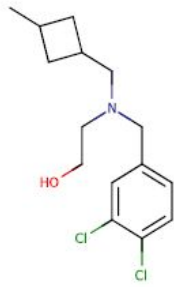

Mol Wt 302.24  
Exact Mass 301.14

| # | Time  | Area%  |
|---|-------|--------|
| 1 | 1.062 | 100.00 |

Q754938\$4

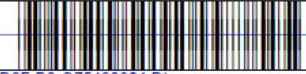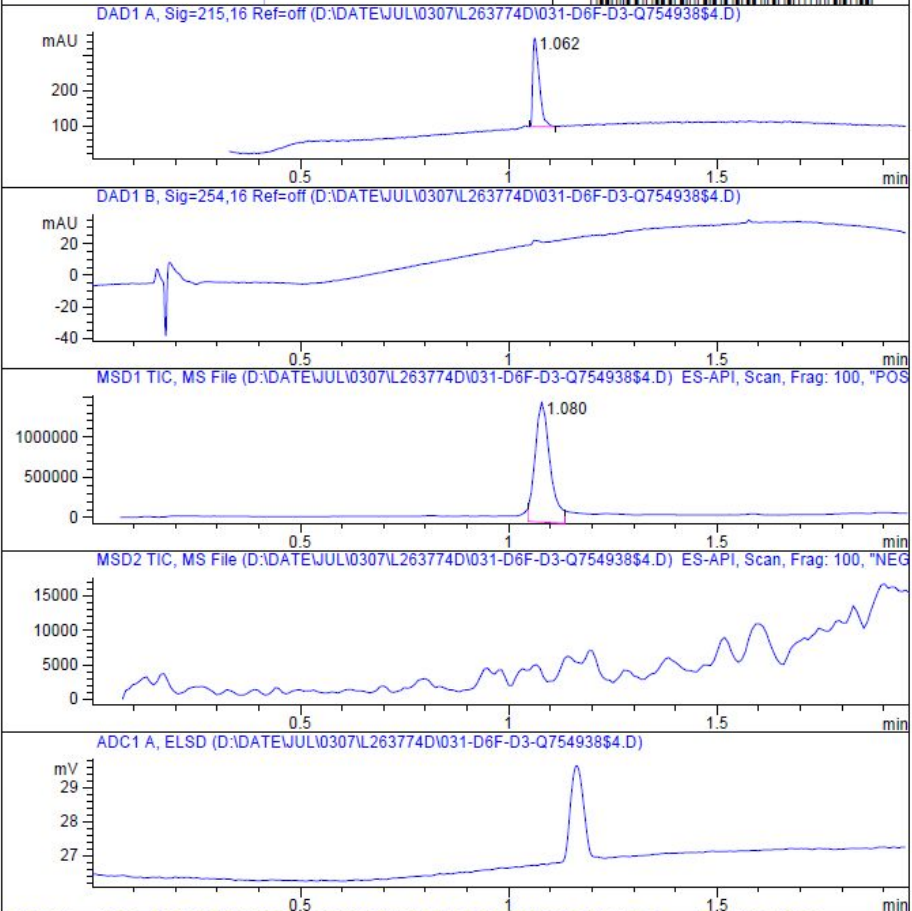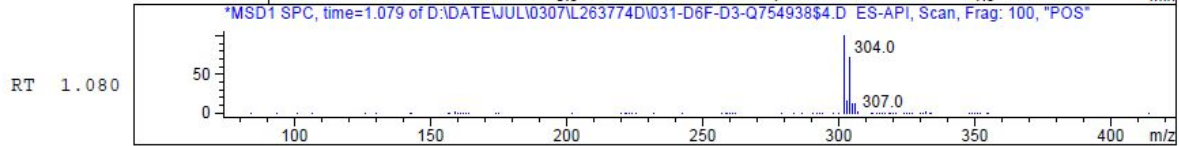

RT 1.080

Enamine ID: PV-001918897538



MaxPeak: 100.00%  
Ret\_Time: 0.844 min

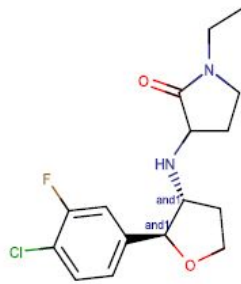

Mol Wt 326.79  
Exact Mass 326.15

| # | Time  | Area%  |
|---|-------|--------|
| 1 | 0.844 | 100.00 |

Q754922\$1

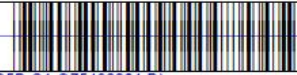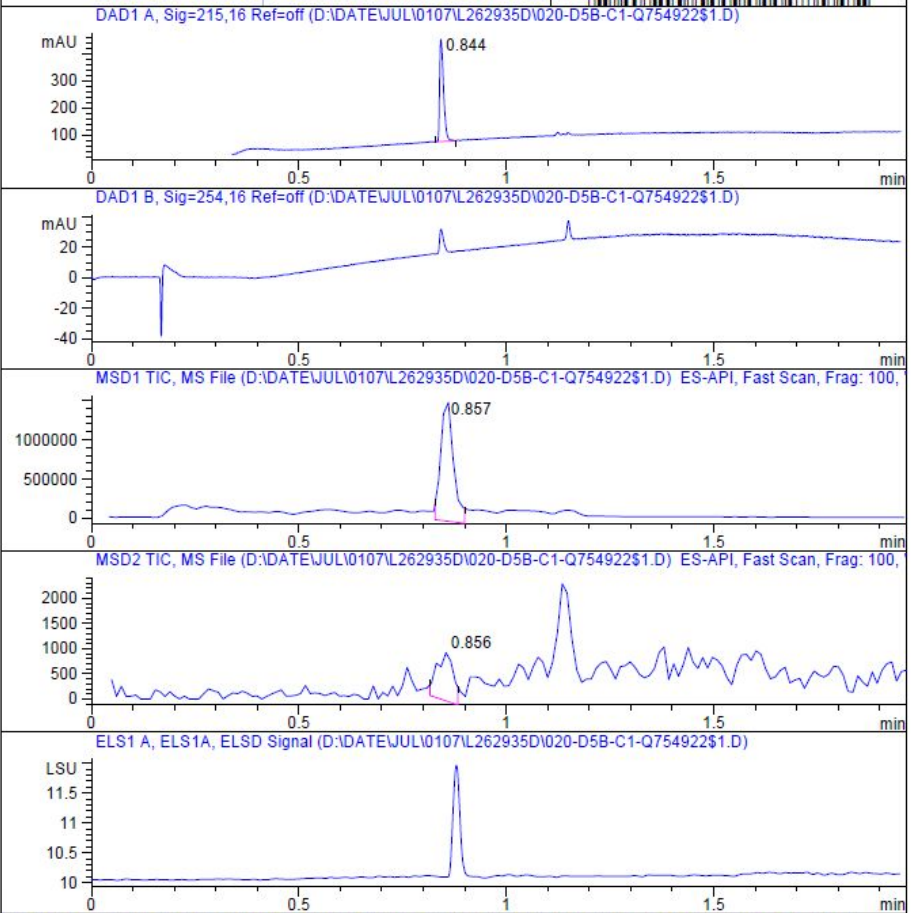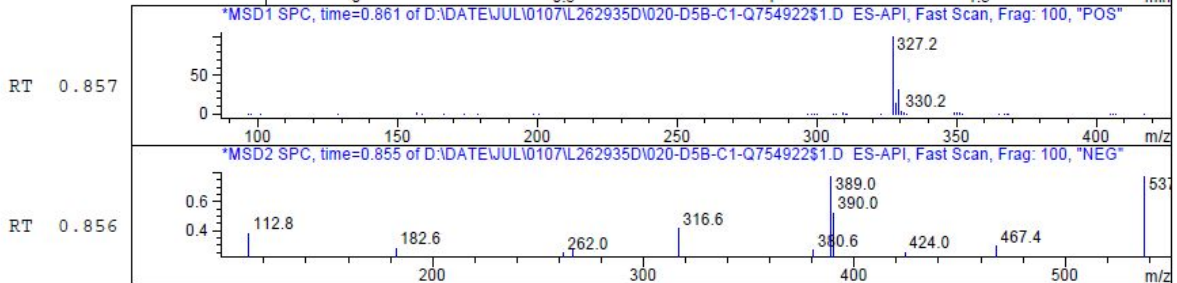

Enamine ID: PV-001921689112

MaxPeak: 98.45%  
Ret\_Time: 1.127 min

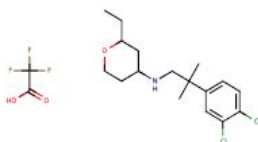

Mol Wt 444.32  
Exact Mass 329.18

| # | Time  | Area% |
|---|-------|-------|
| 1 | 1.088 | 1.55  |
| 2 | 1.127 | 98.45 |

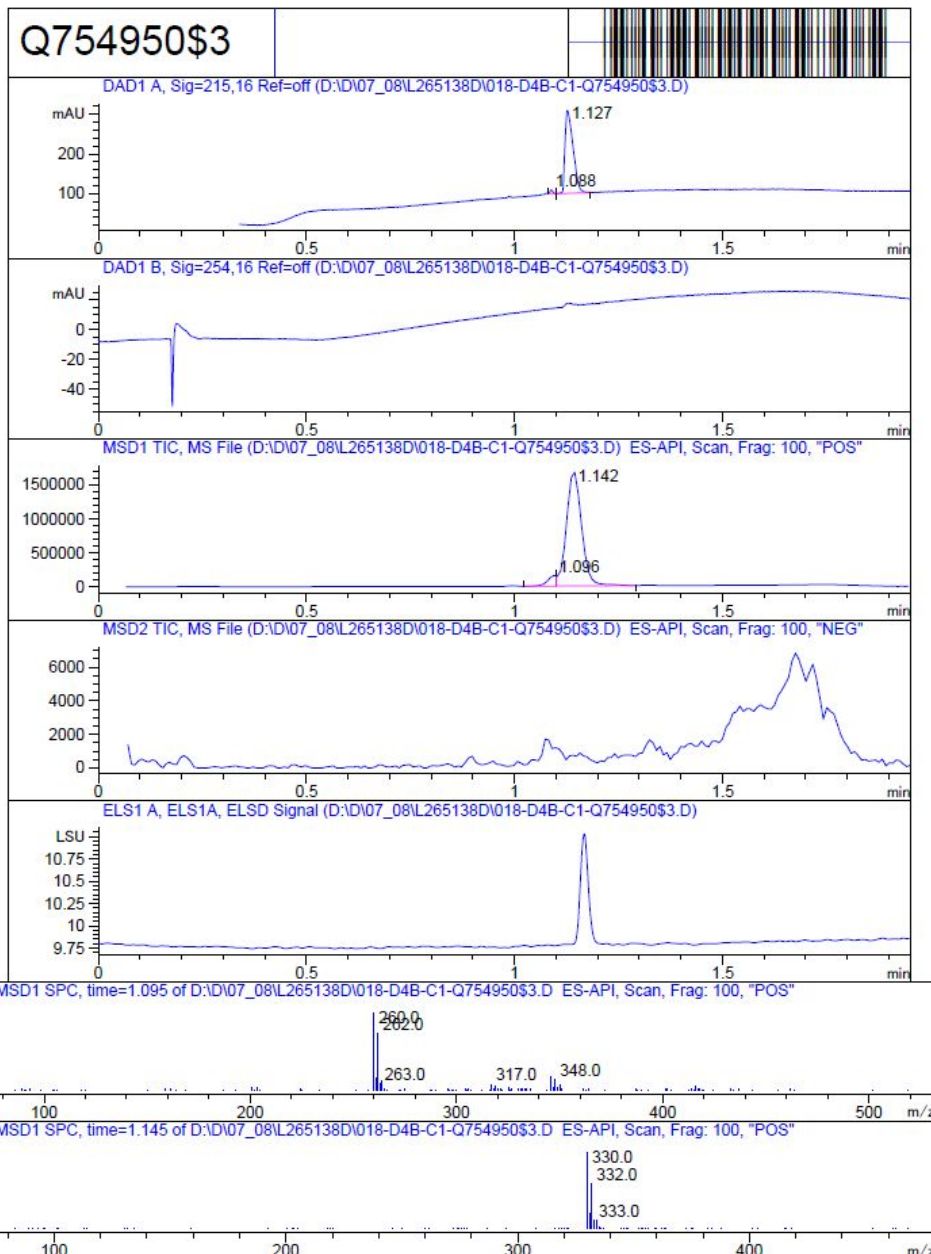

Enamine ID: PV-001923897672

MaxPeak: 96.55%  
Ret\_Time: 0.644 min

Q754951\$48

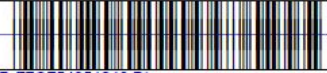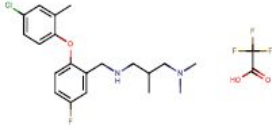

Mol Wt 478.91  
Exact Mass 364.22

| # | Time  | Area% |
|---|-------|-------|
| 1 | 0.644 | 96.55 |
| 2 | 0.959 | 3.45  |

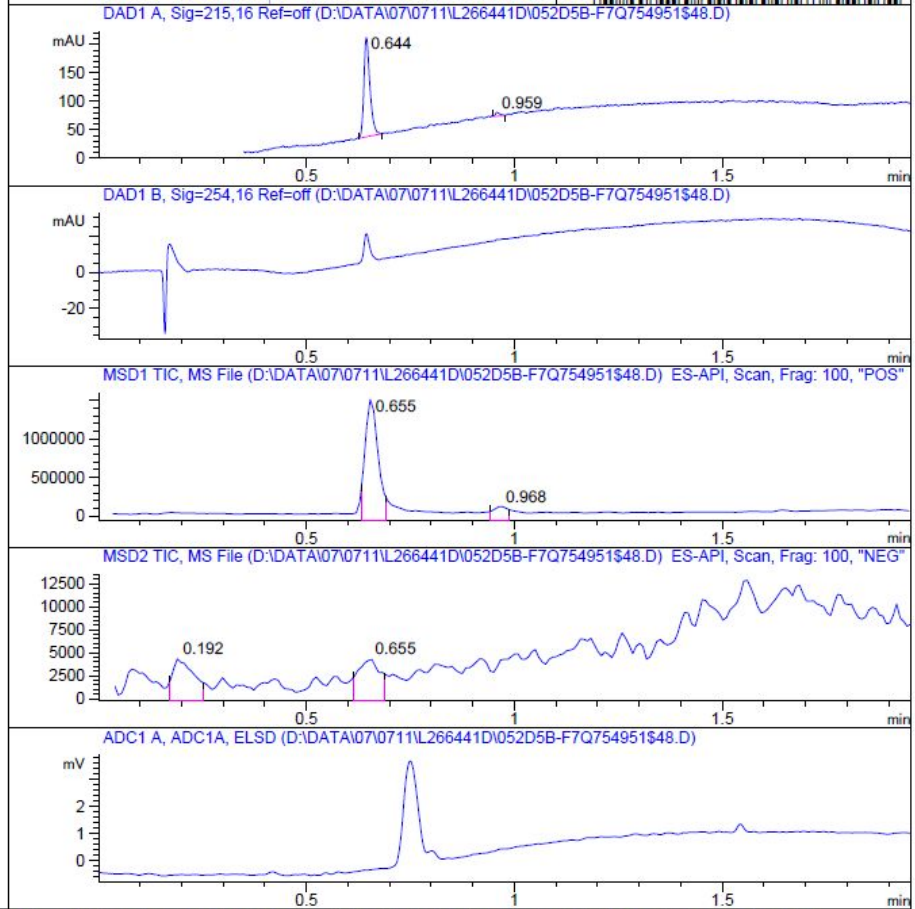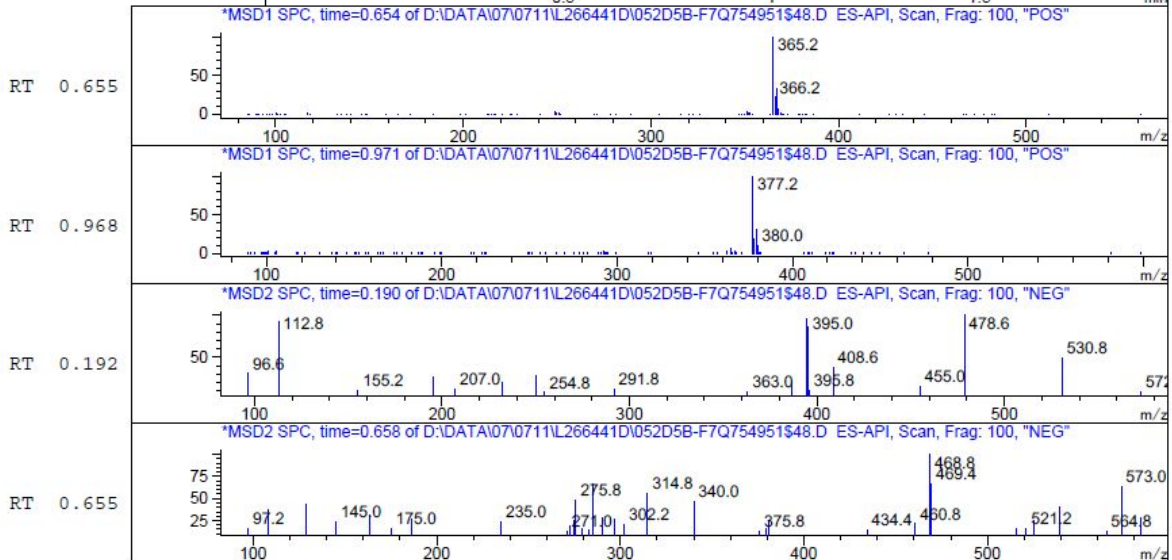

Enamine ID: PV-001925822957

MaxPeak: 100.00%  
Ret\_Time: 0.797 min

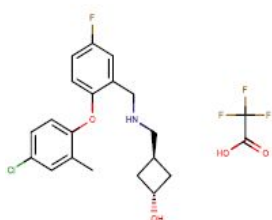

Mol Wt 463.85  
Exact Mass 349.16

| # | Time  | Area%  |
|---|-------|--------|
| 1 | 0.797 | 100.00 |

Q754945\$26

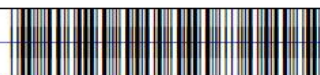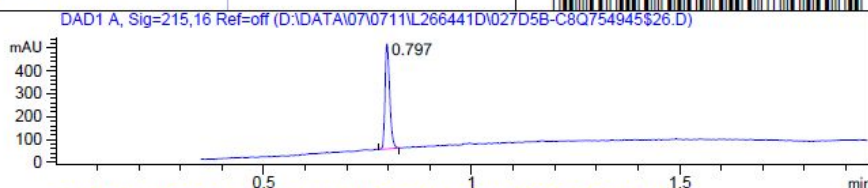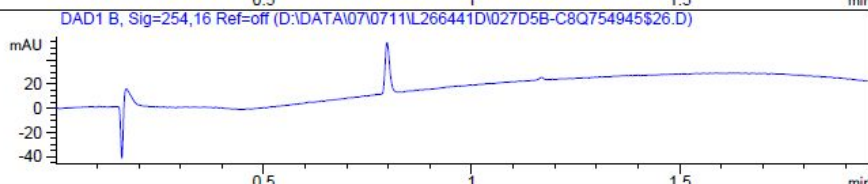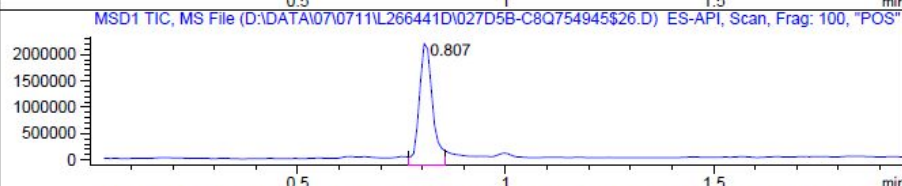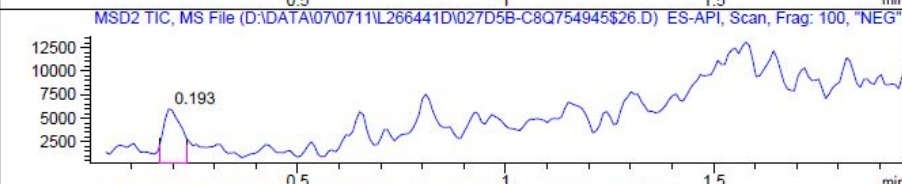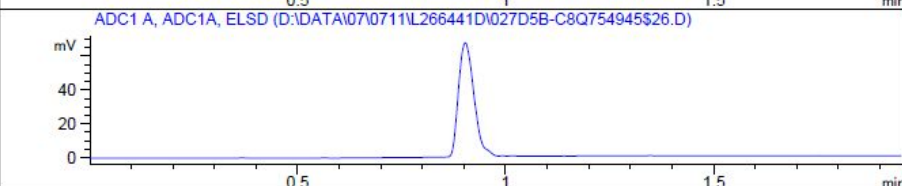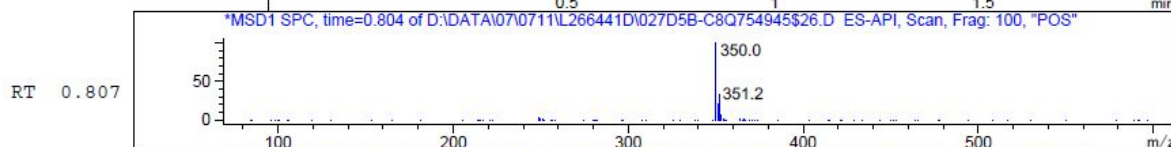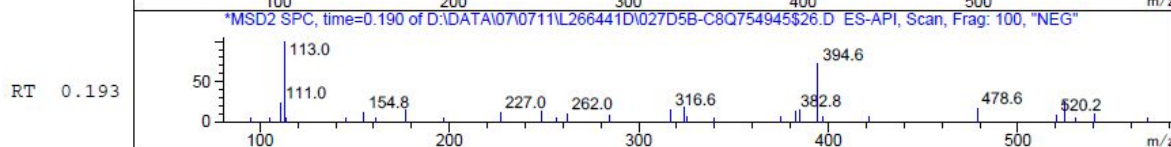

Enamine ID: PV-001926691632

MaxPeak: 93.45%  
Ret\_Time: 1.624 min

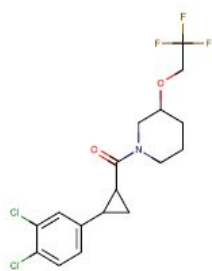

Mol Wt 396.23  
Exact Mass 395.1

| # | Time  | Area% |
|---|-------|-------|
| 1 | 1.592 | 6.55  |
| 2 | 1.624 | 93.45 |

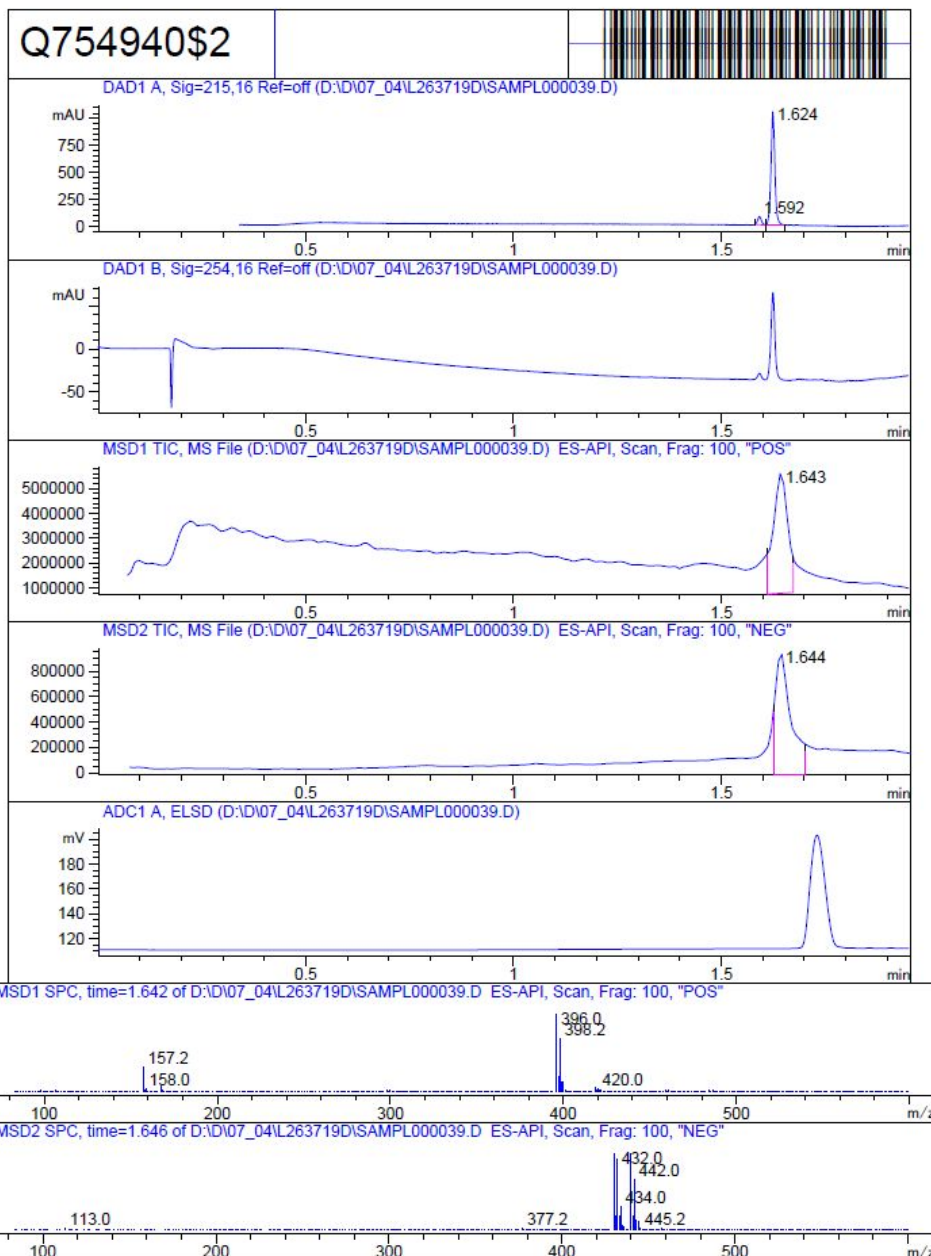

Enamine ID: Z1083362508

MaxPeak: 100.00%  
Ret\_Time: 1.058 min

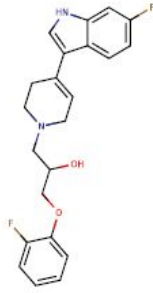

Mol Wt 384.42  
Exact Mass 384.2

| # | Time  | Area%  |
|---|-------|--------|
| 1 | 1.058 | 100.00 |

Q754935\$2

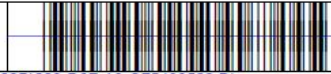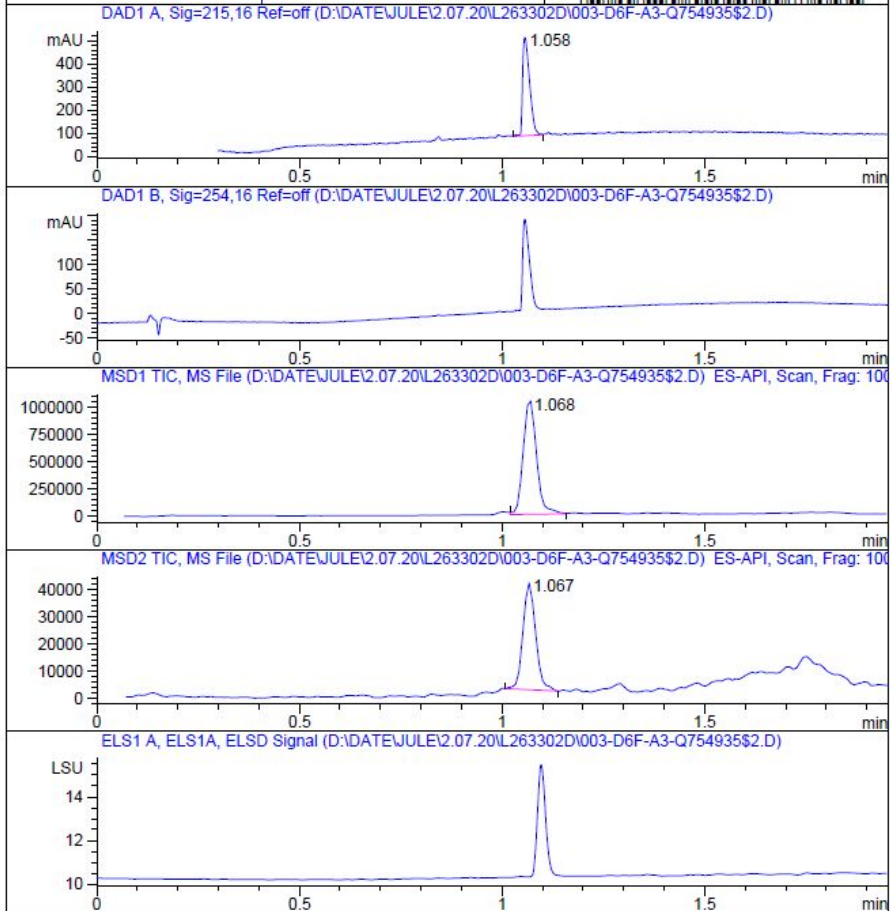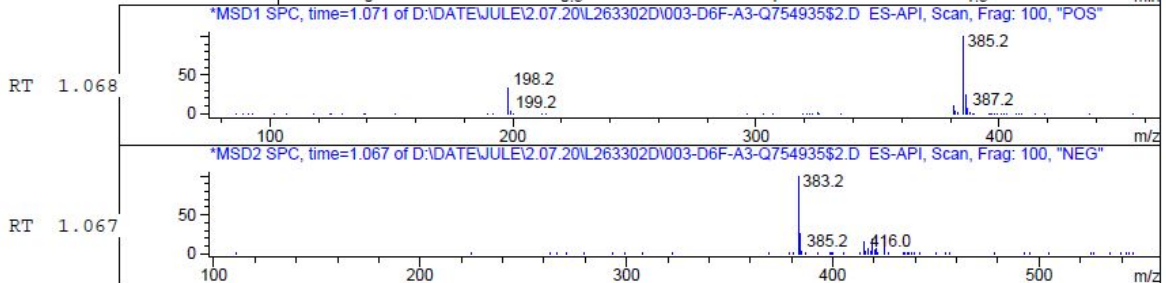

Enamine ID: Z1485114833

MaxPeak: 100.00%  
Ret\_Time: 1.083 min

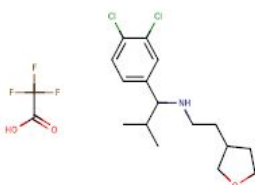

Mol Wt 430.29  
Exact Mass 315.16

| # | Time  | Area%  |
|---|-------|--------|
| 1 | 1.083 | 100.00 |

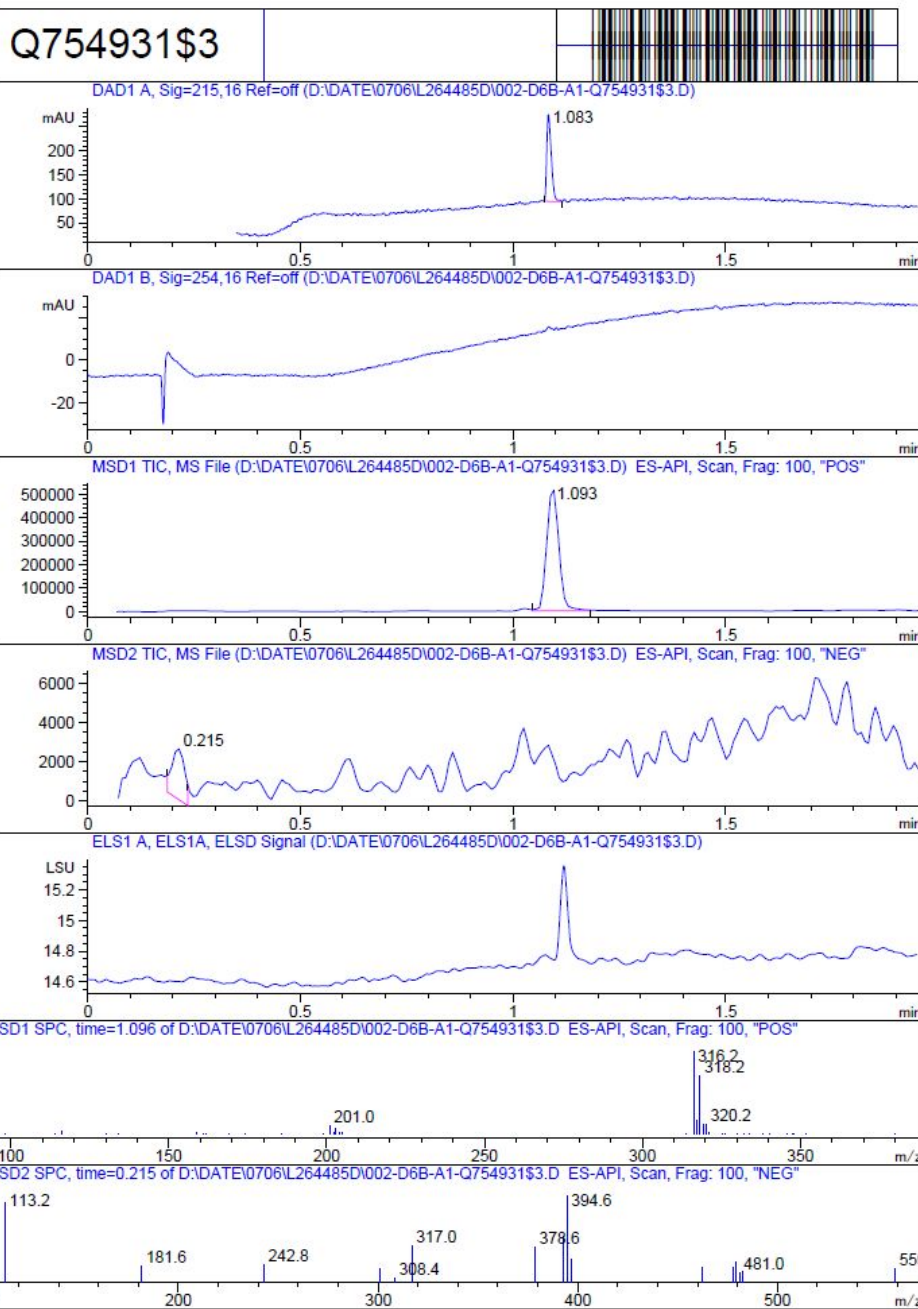

Enamine ID: Z1663514926

MaxPeak: 98.94%  
Ret\_Time: 1.037 min

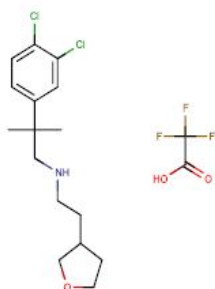

Mol Wt 430.29  
Exact Mass 315.16

| # | Time  | Area% |
|---|-------|-------|
| 1 | 0.694 | 1.06  |
| 2 | 1.037 | 98.94 |

Q754928\$34

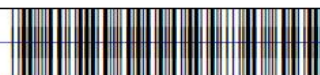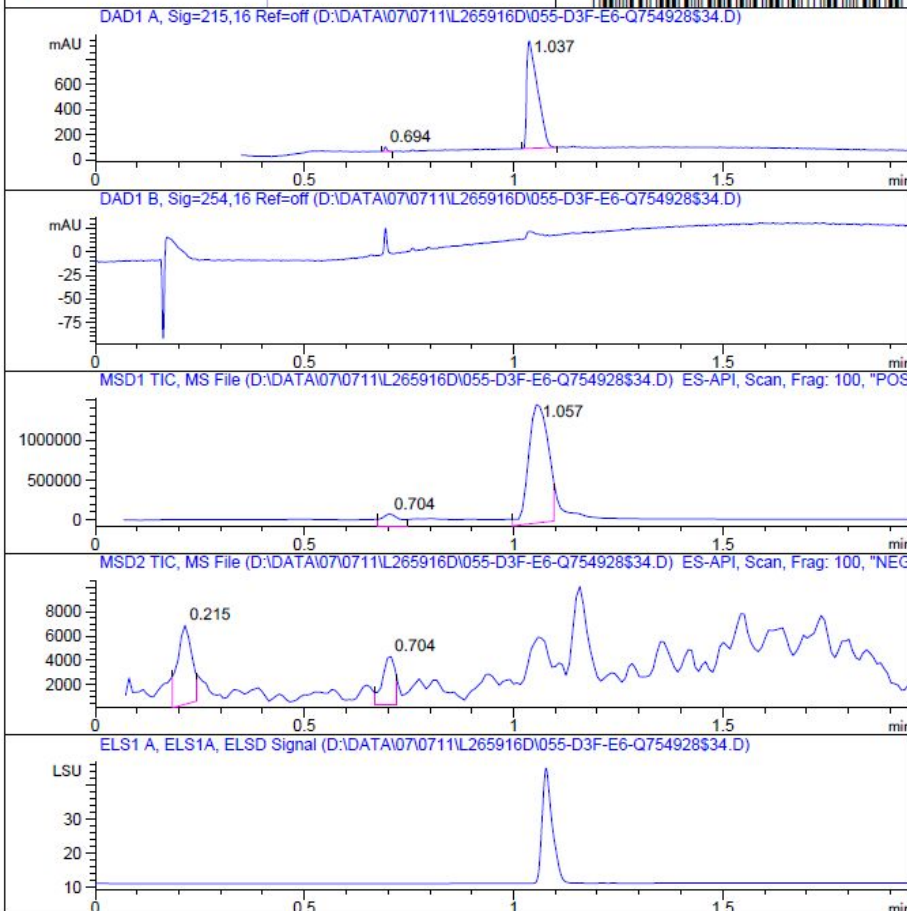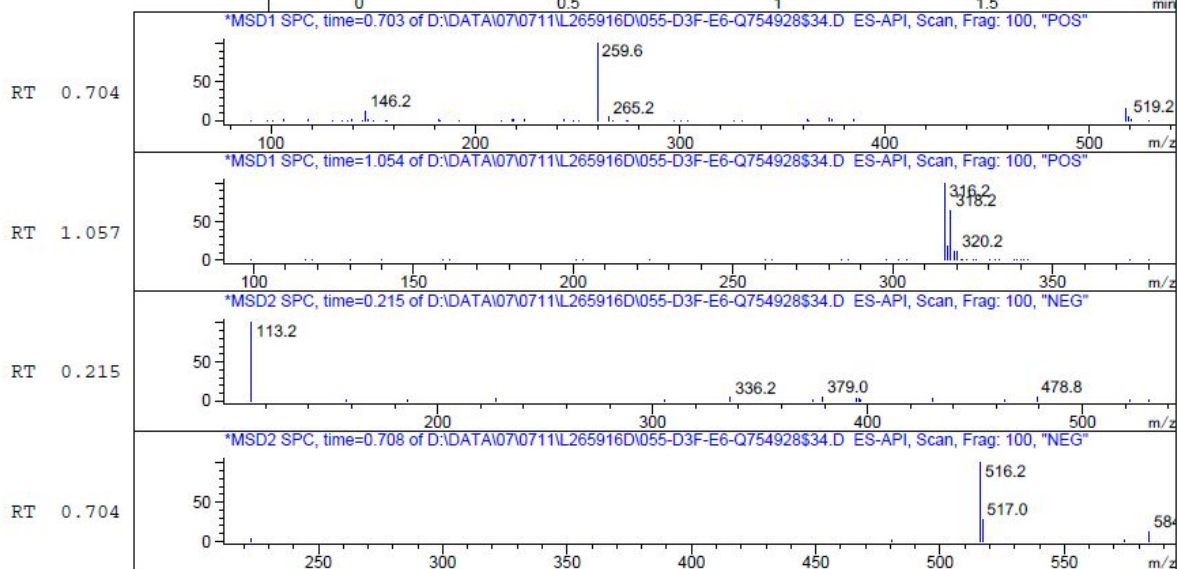

Enamine ID: Z1783772638



MaxPeak: 90.57%  
Ret\_Time: 1.071 min

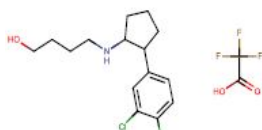

Mol Wt 416.26  
Exact Mass 301.14

| # | Time  | Area% |
|---|-------|-------|
| 1 | 1.050 | 5.62  |
| 2 | 1.071 | 90.57 |
| 3 | 1.186 | 3.81  |

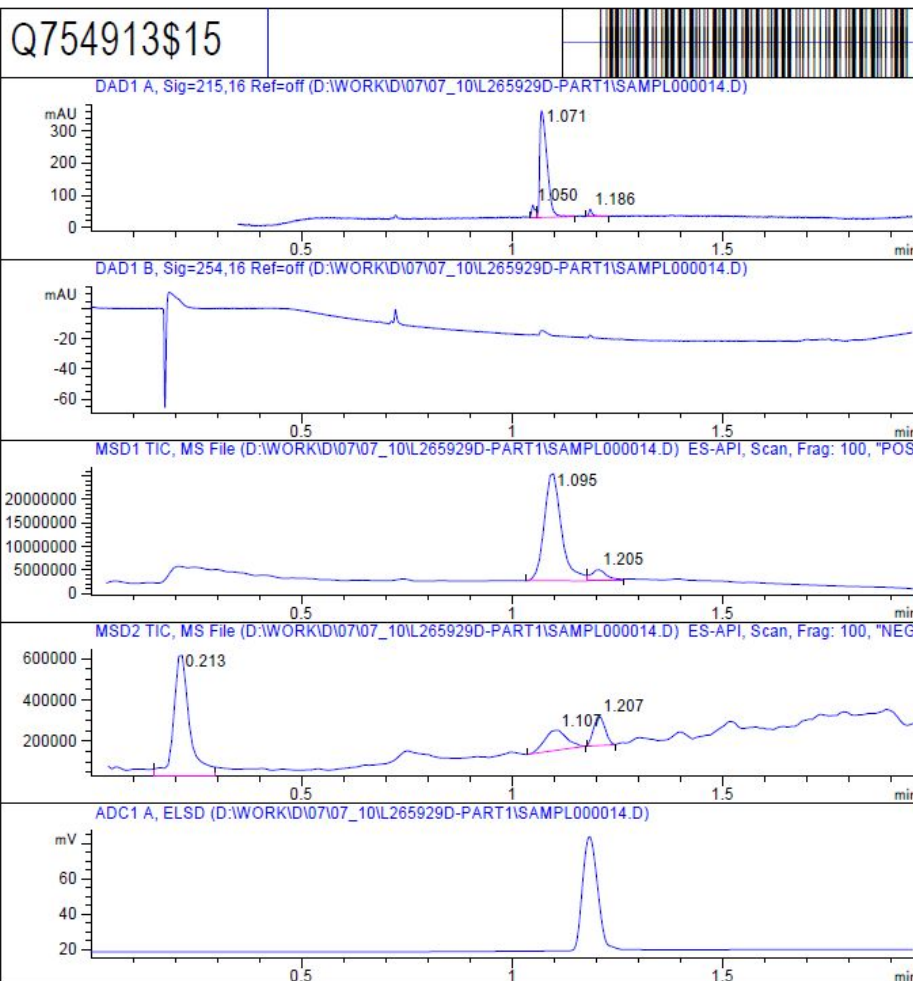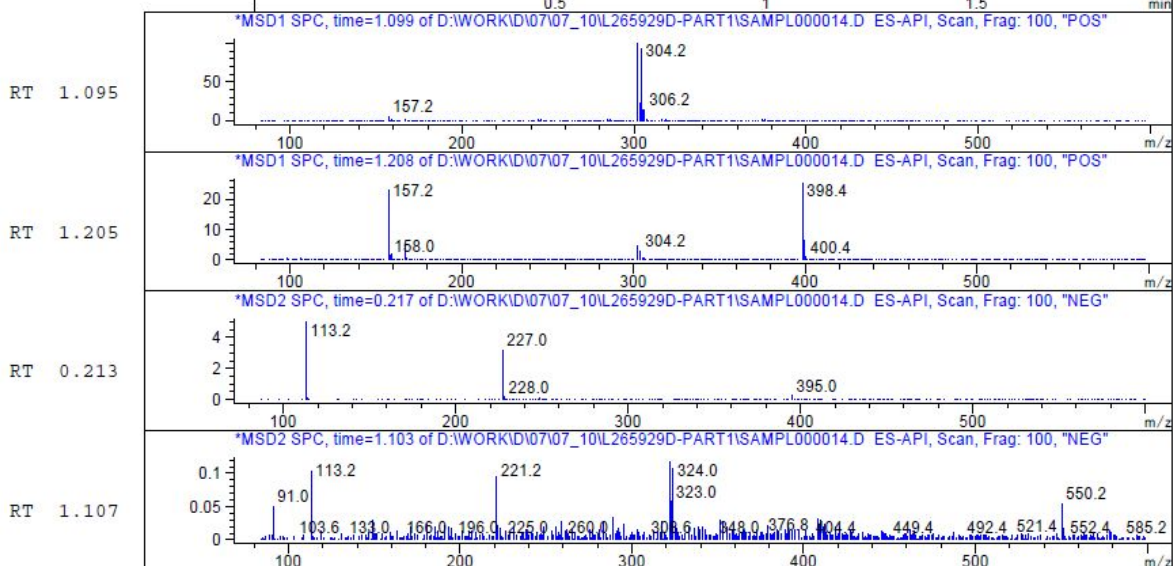

Enamine ID: Z1904820040

MaxPeak: 100.00%  
Ret\_Time: 1.105 min

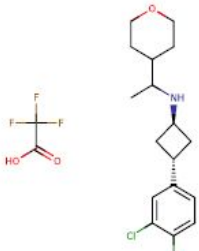

Mol Wt 442.3  
Exact Mass 327.16

| # | Time  | Area%  |
|---|-------|--------|
| 1 | 1.105 | 100.00 |

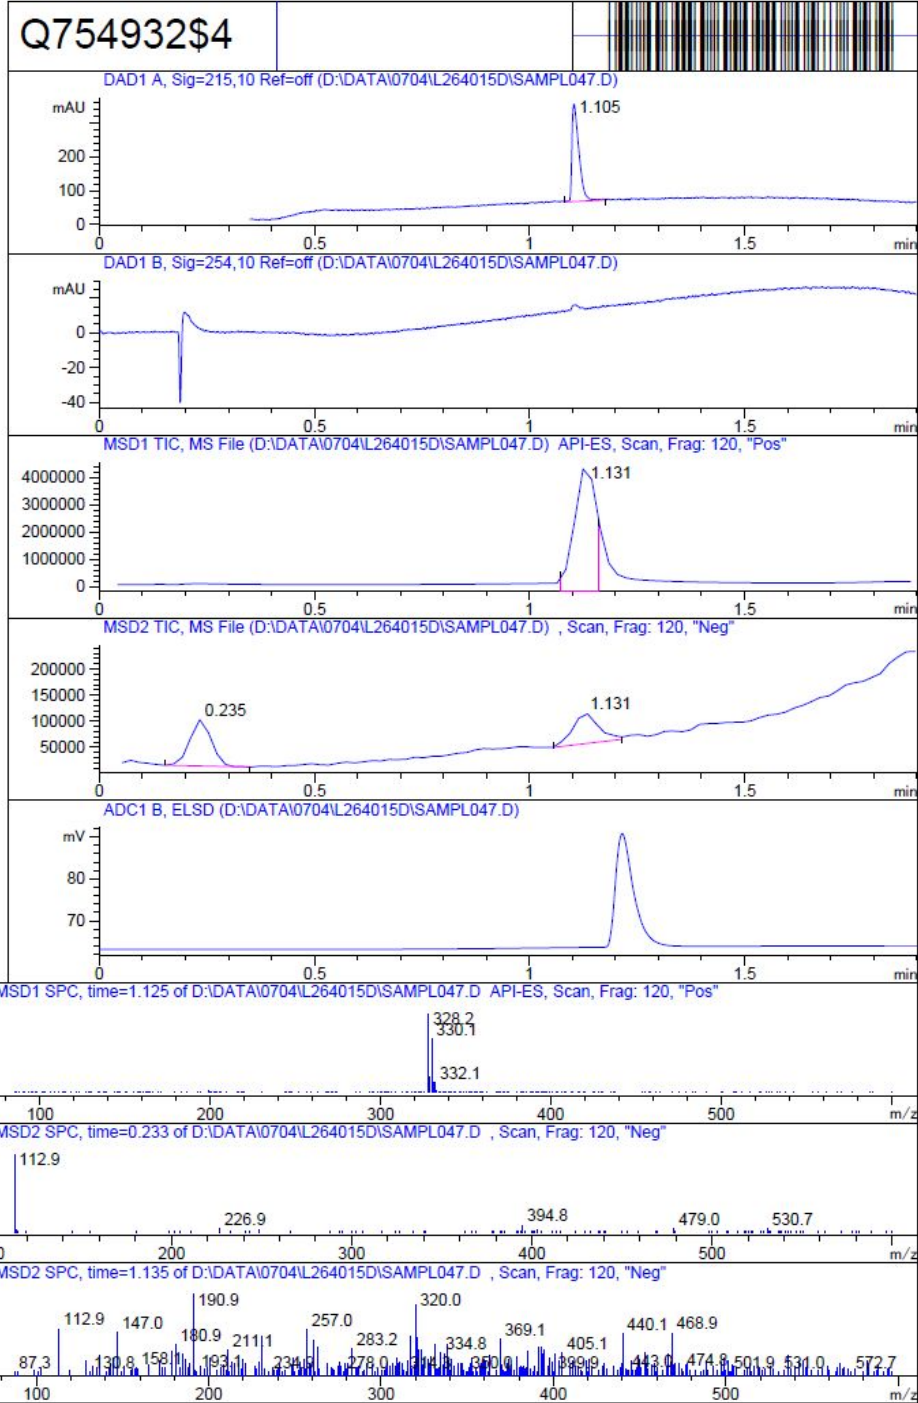

Enamine ID: Z1986623199

MaxPeak: 98.86%  
Ret\_Time: 0.589 min

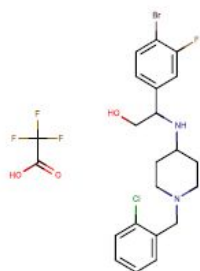

Mol Wt 555.79  
Exact Mass 442.11

| # | Time  | Area% |
|---|-------|-------|
| 1 | 0.589 | 98.86 |
| 2 | 0.874 | 1.14  |

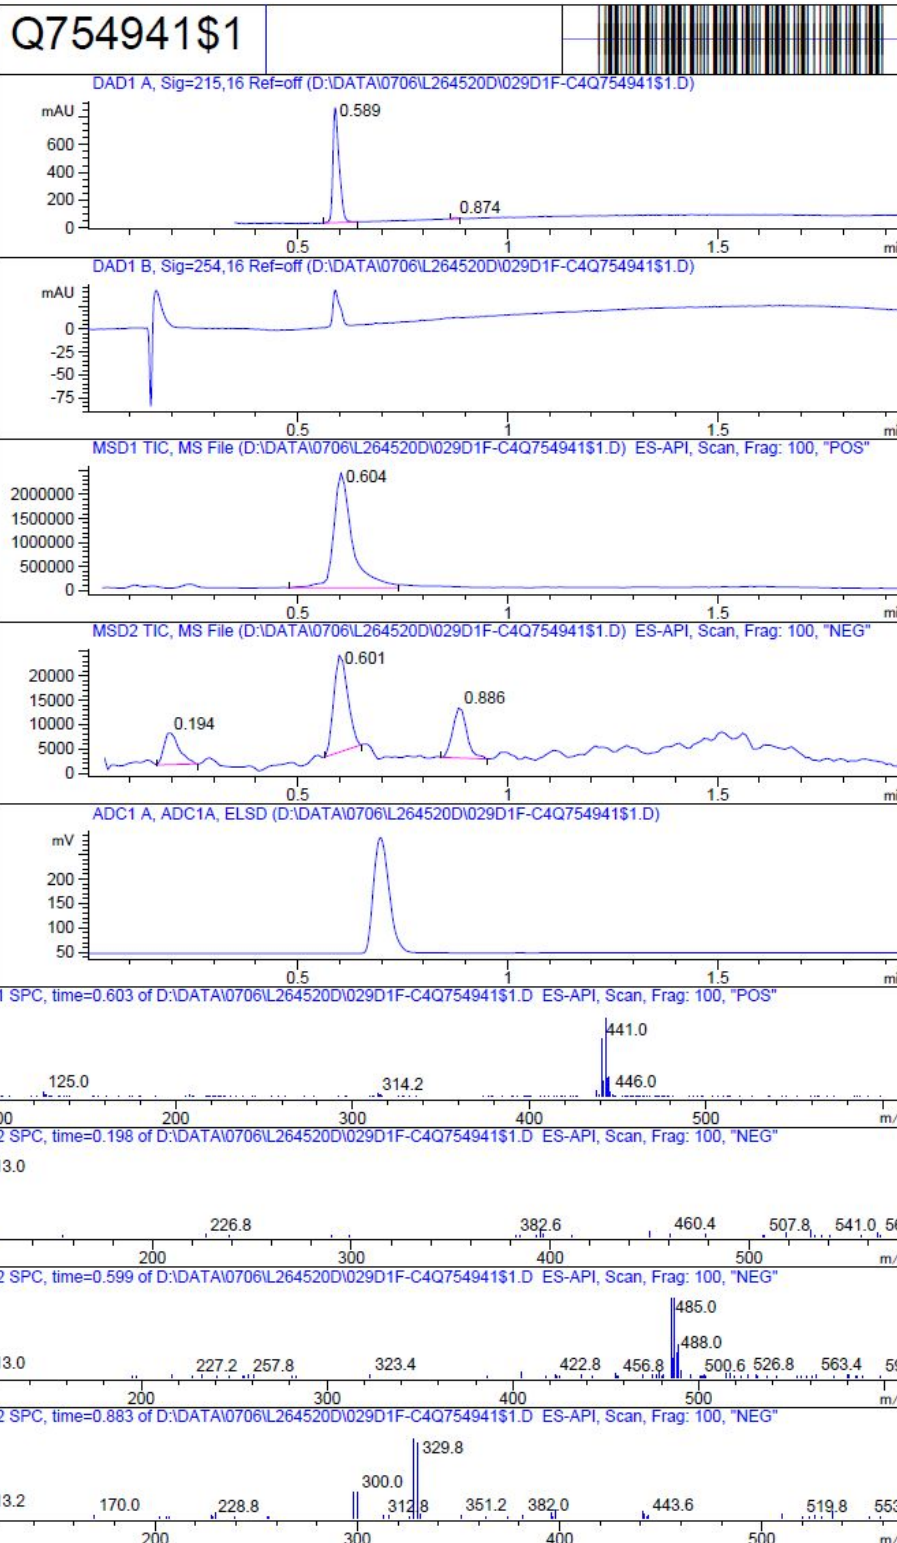

Enamine ID: Z2201777668

MaxPeak: 100.00%  
Ret\_Time: 1.075 min

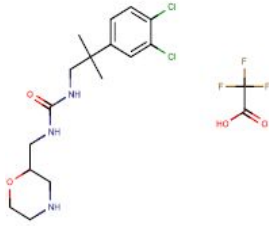

Mol Wt 474.3  
Exact Mass 359.15

| # | Time  | Area%  |
|---|-------|--------|
| 1 | 1.075 | 100.00 |

Q754949\$3

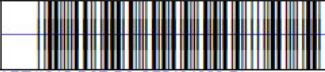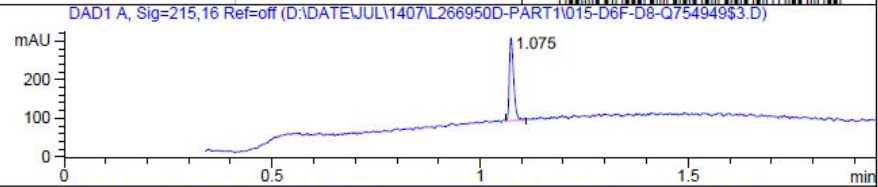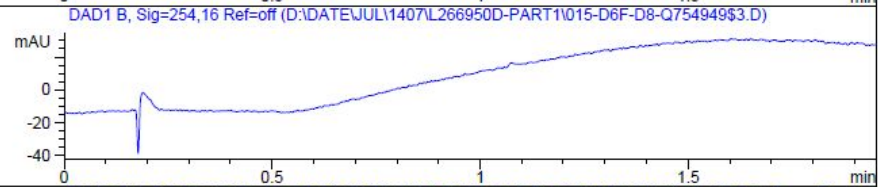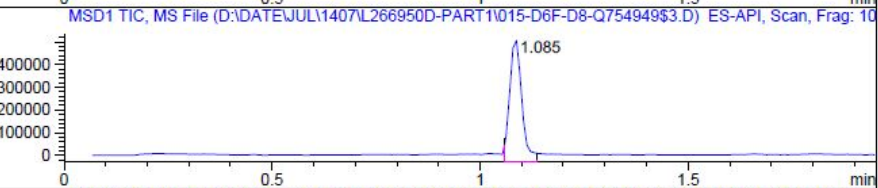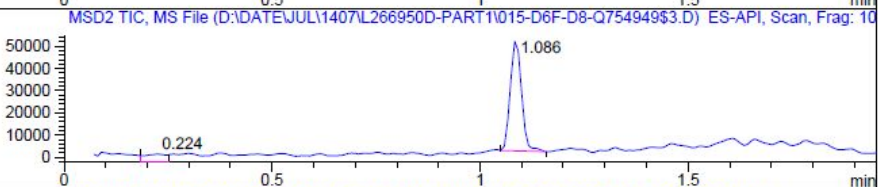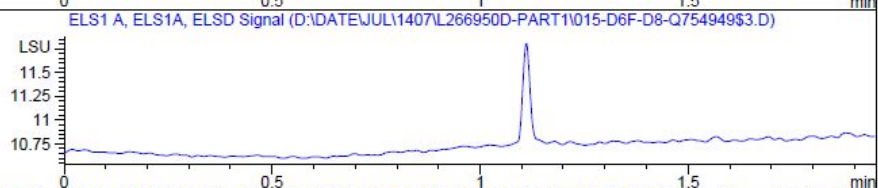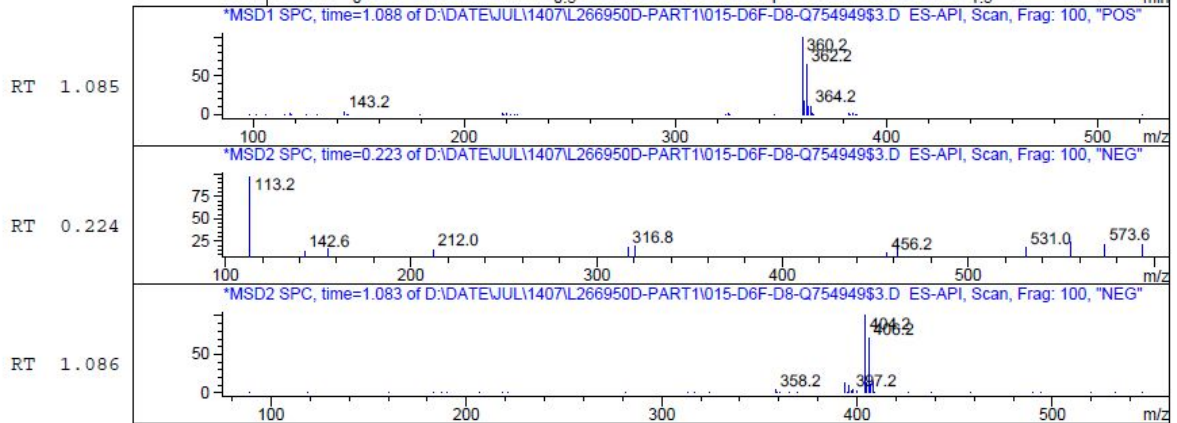

Enamine ID: Z2361435743

MaxPeak: 100.00%  
Ret\_Time: 1.084 min

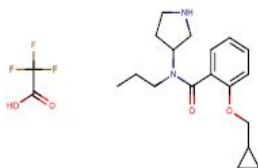

Mol Wt 416.44  
Exact Mass 302.24

| # | Time  | Area%  |
|---|-------|--------|
| 1 | 1.084 | 100.00 |

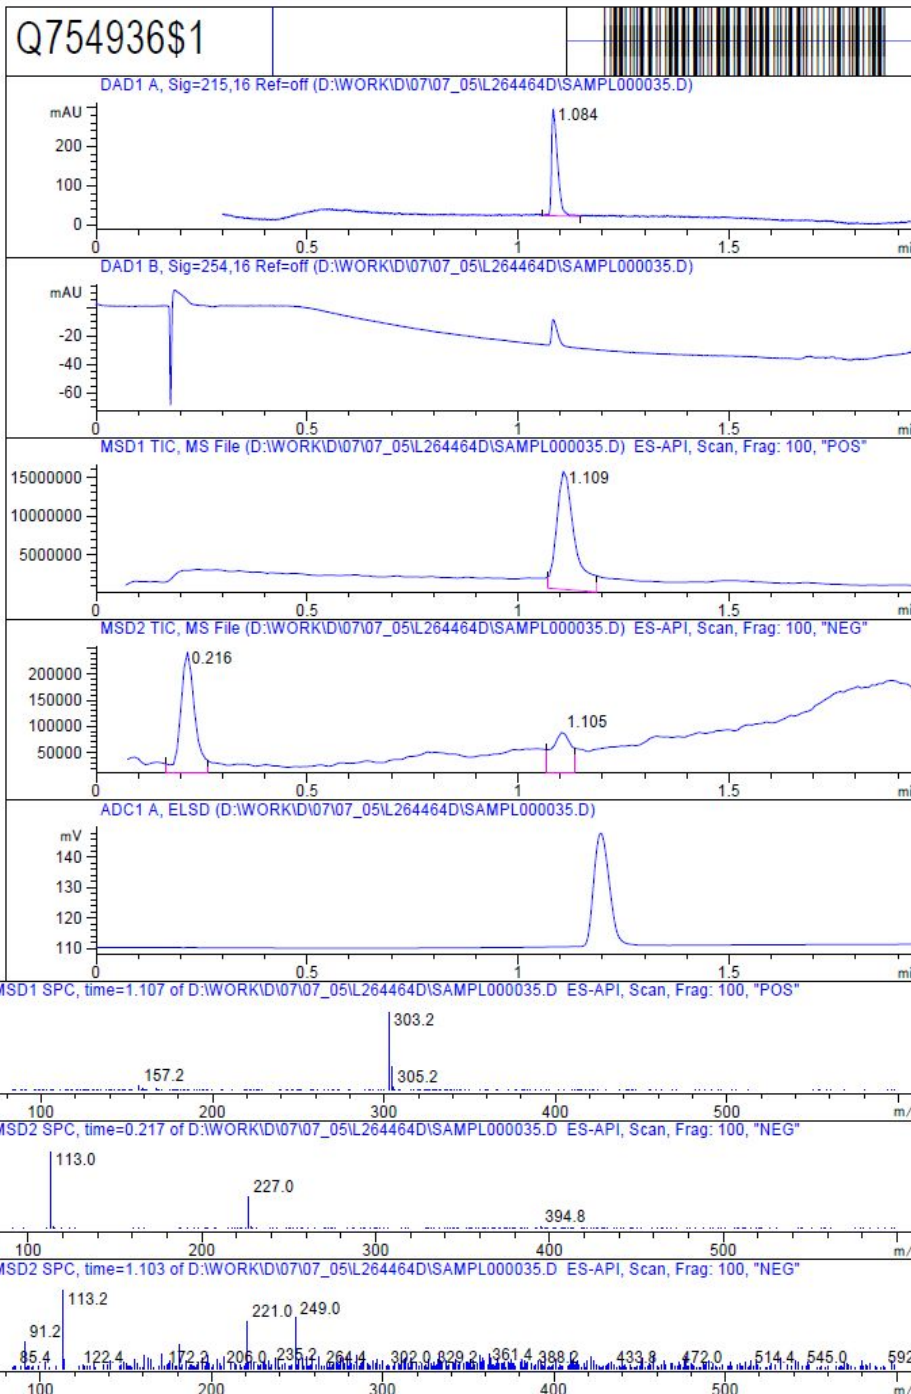

Enamine ID: Z2393213853

MaxPeak: 97.44%  
Ret\_Time: 1.081 min

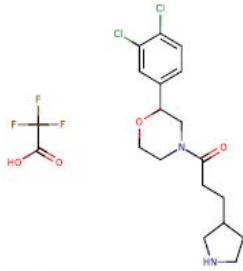

Mol Wt 471.3  
Exact Mass 356.14

| # | Time  | Area% |
|---|-------|-------|
| 1 | 0.967 | 2.56  |
| 2 | 1.081 | 97.44 |

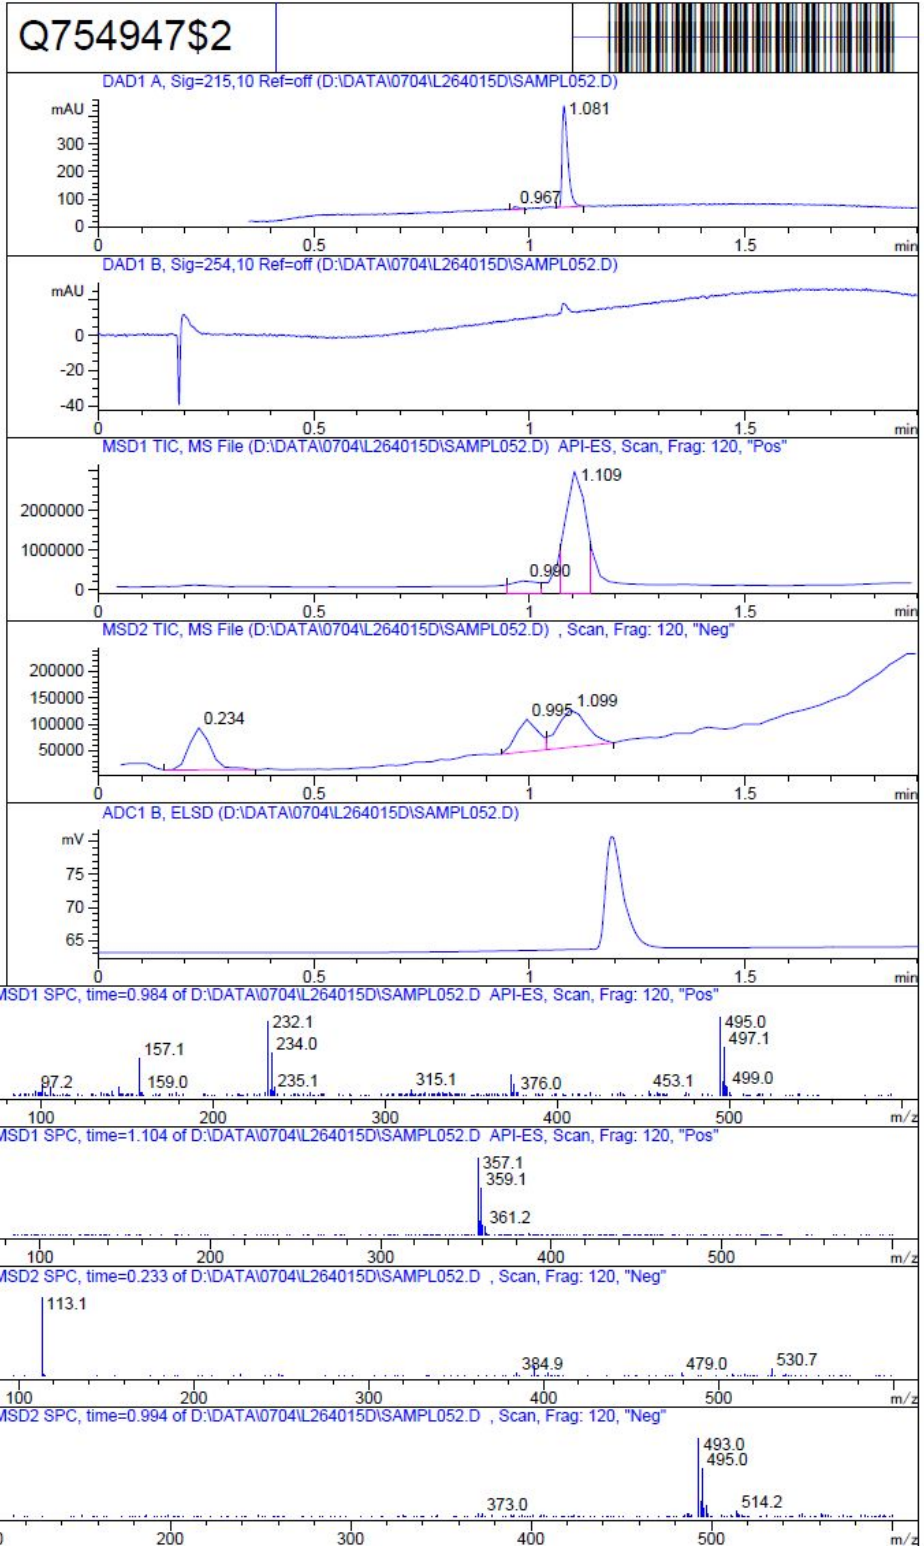

Enamine ID: Z2436746713

MaxPeak: 98.77%  
Ret\_Time: 0.929 min

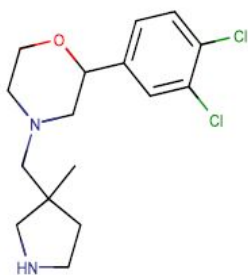

Mol Wt 329.26  
Exact Mass 328.15

| # | Time  | Area% |
|---|-------|-------|
| 1 | 0.929 | 98.77 |
| 2 | 1.143 | 1.23  |

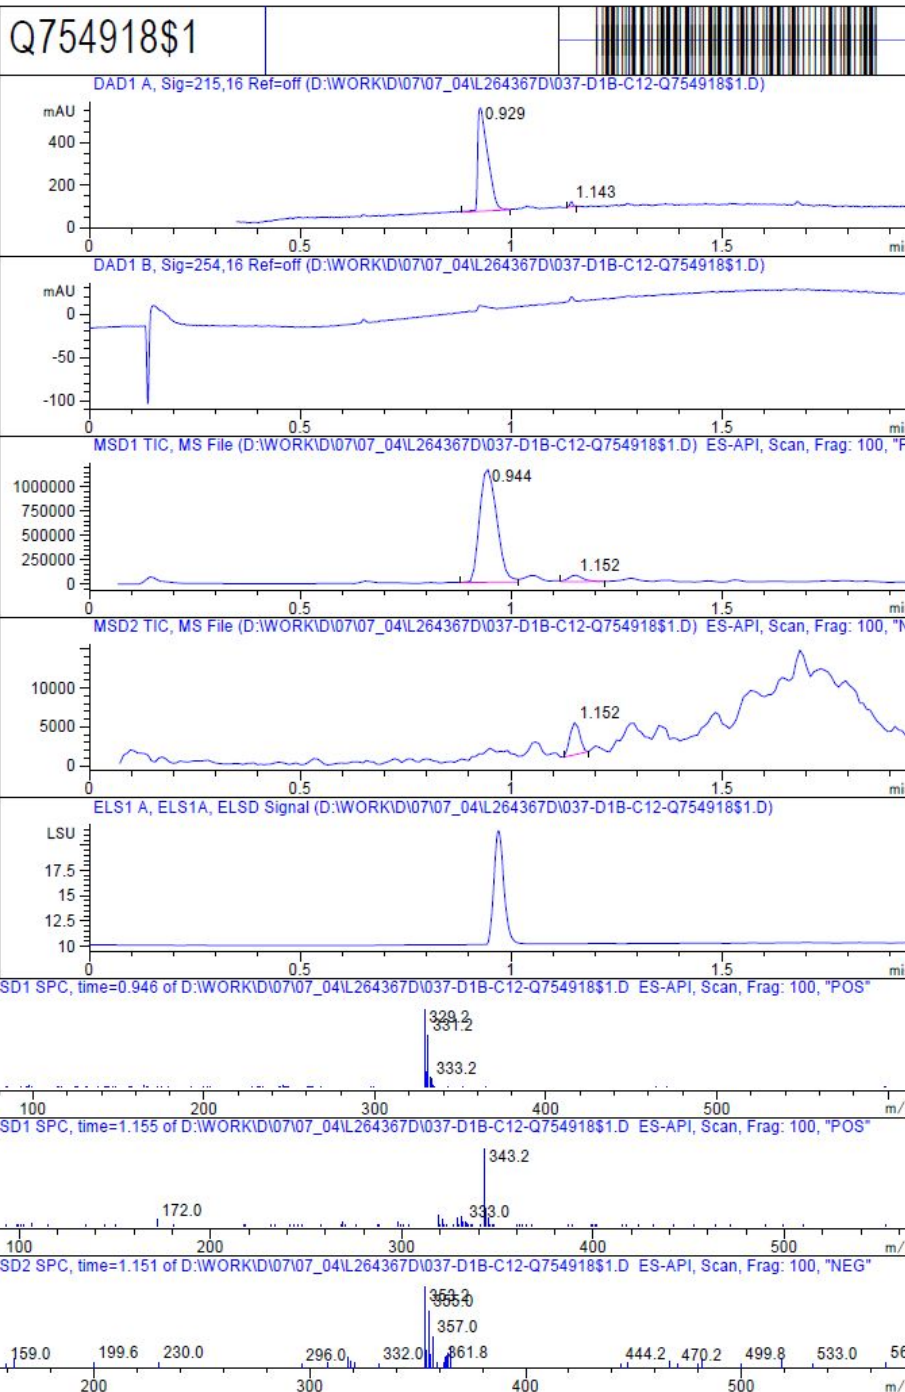

Enamine ID: Z2444828348

MaxPeak: 96.66%  
Ret\_Time: 1.026 min

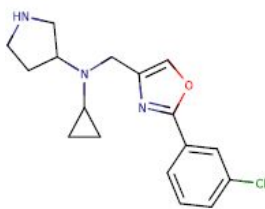

Mol Wt 317.81  
Exact Mass 317.16

| # | Time  | Area% |
|---|-------|-------|
| 1 | 0.749 | 3.34  |
| 2 | 1.026 | 96.66 |

Q754948\$1

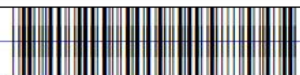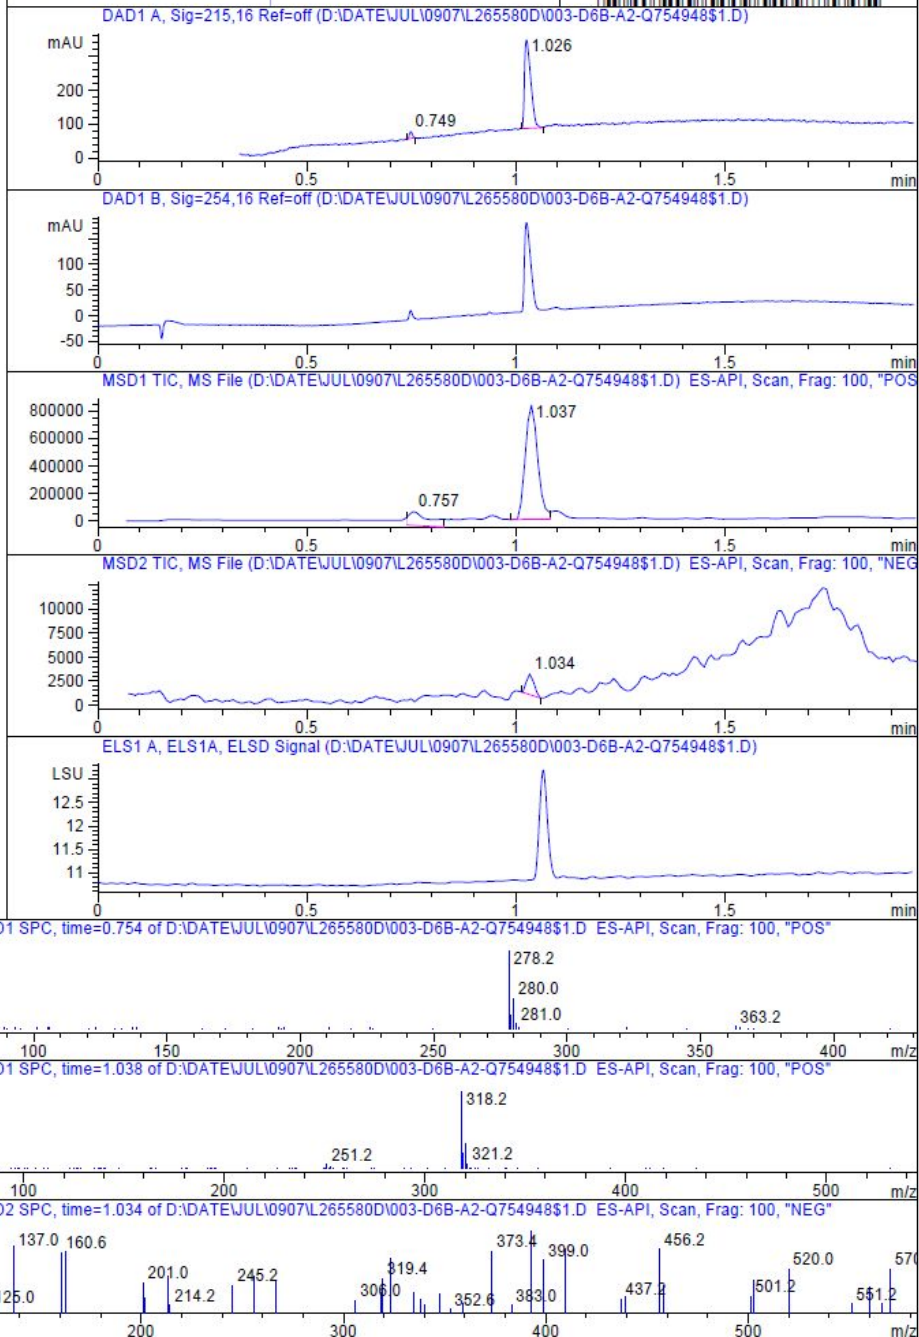

Enamine ID: Z2447436630



MaxPeak: 98.13%  
Ret\_Time: 0.882 min

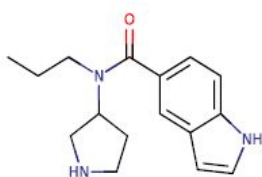

Mol Wt 271.36  
Exact Mass 271.2

| # | Time  | Area% |
|---|-------|-------|
| 1 | 0.882 | 98.13 |
| 2 | 1.445 | 1.87  |

Q754912\$22

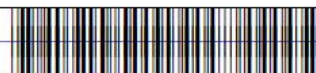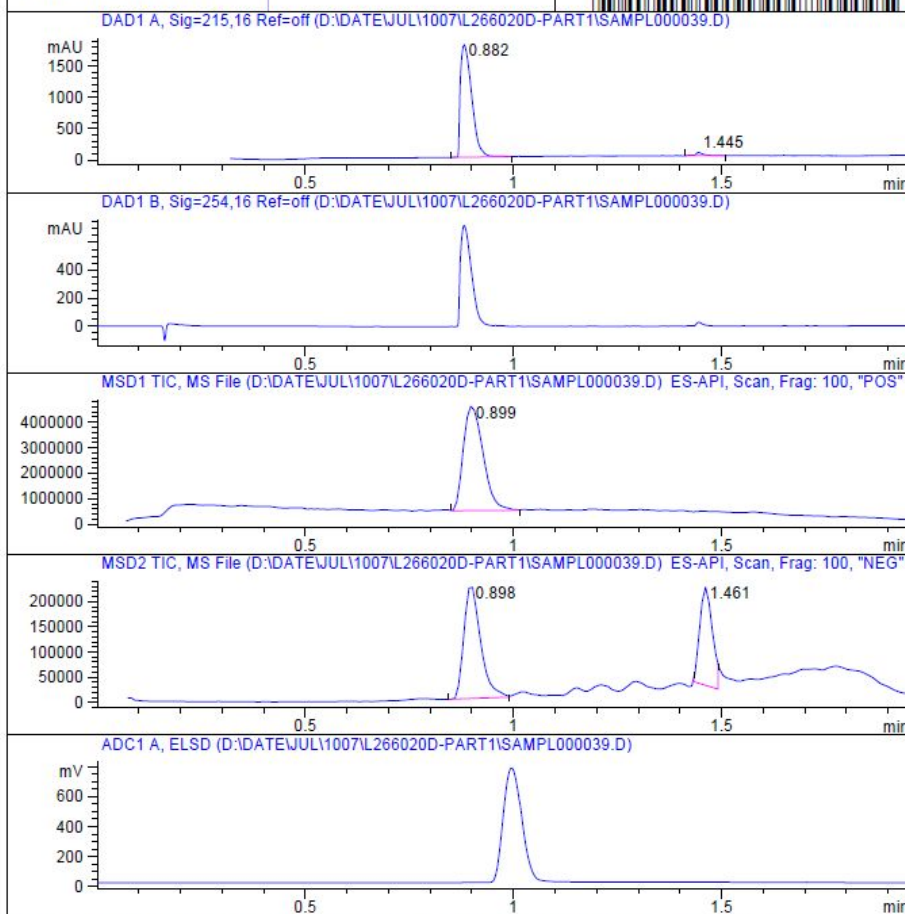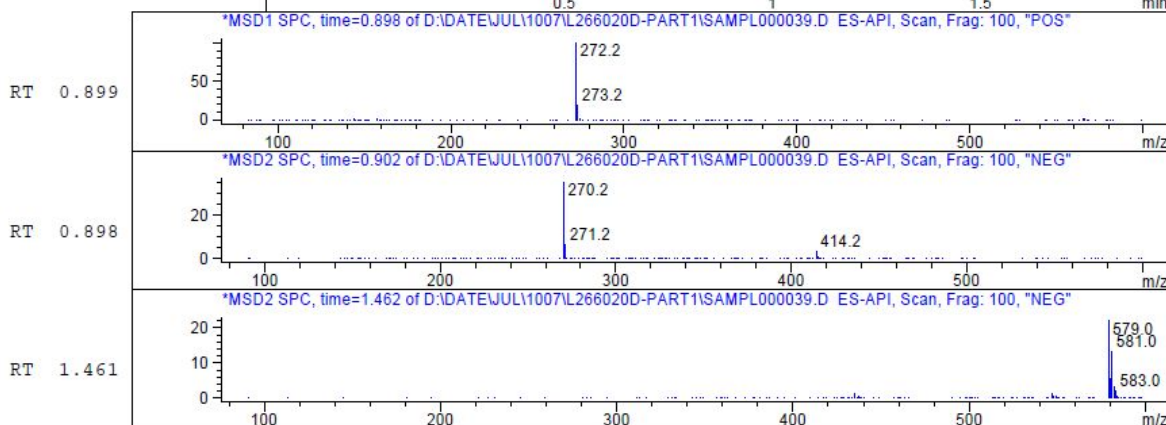

Enamine ID: Z2488563933

MaxPeak: 100.00%  
Ret\_Time: 0.993 min

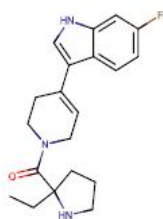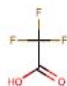

Mol Wt 455.45  
Exact Mass 341.23

| # | Time  | Area%  |
|---|-------|--------|
| 1 | 0.993 | 100.00 |

Q754937\$42

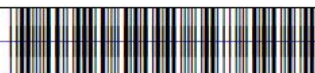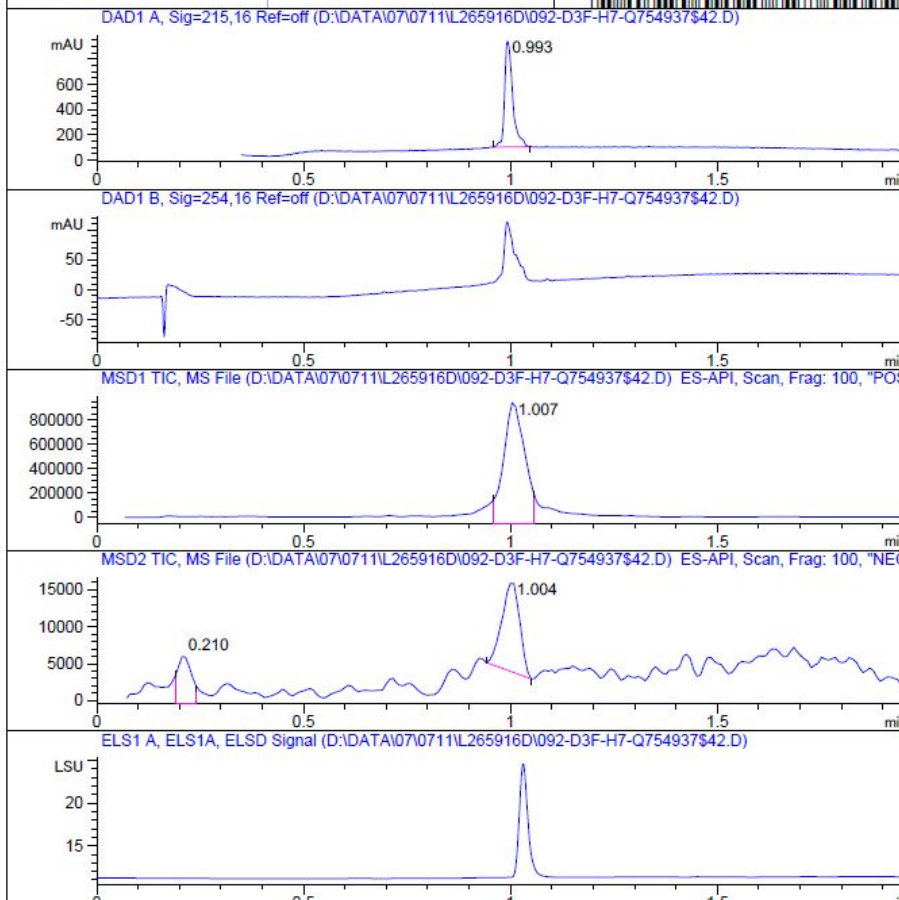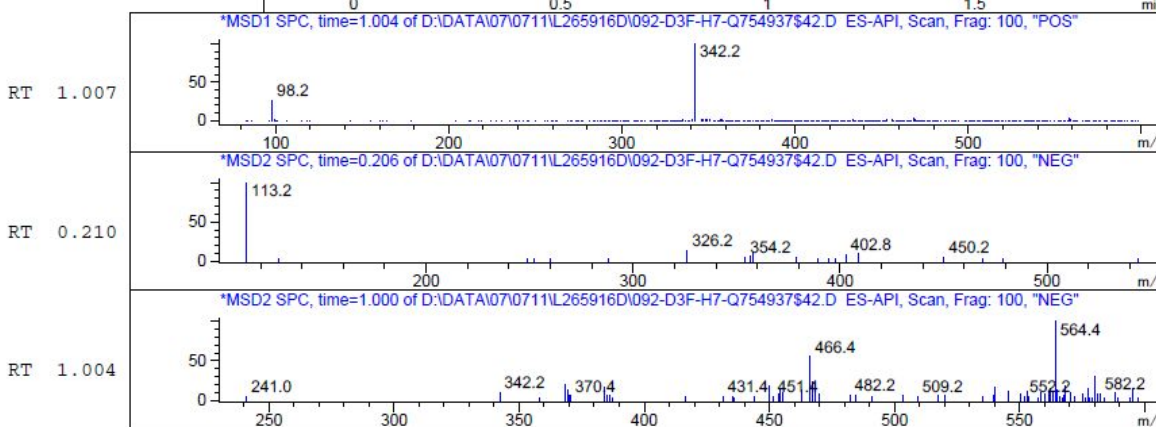

Enamine ID: Z2488796202

MaxPeak: 96.69%  
Ret\_Time: 1.047 min

Q754942\$4

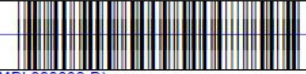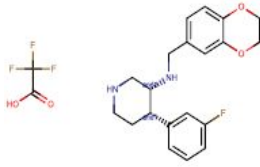

Mol Wt 456.43  
Exact Mass 342.21

| # | Time  | Area% |
|---|-------|-------|
| 1 | 1.047 | 96.69 |
| 2 | 1.114 | 3.31  |

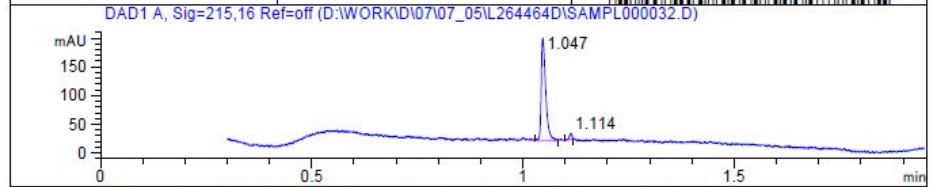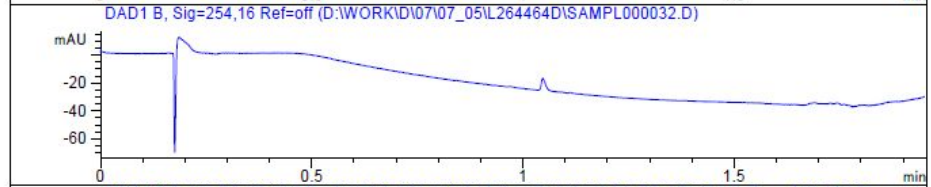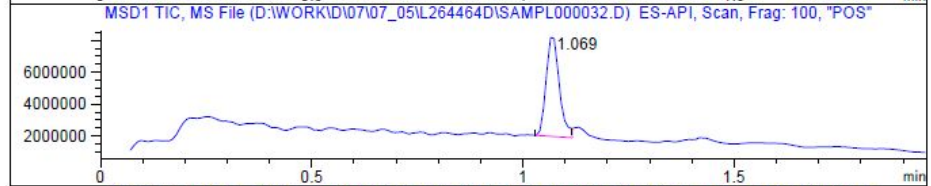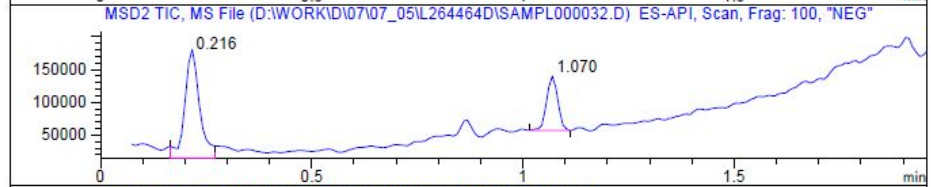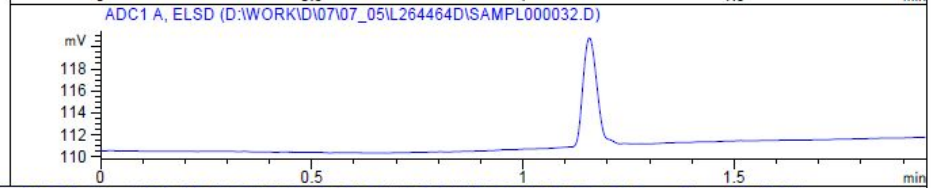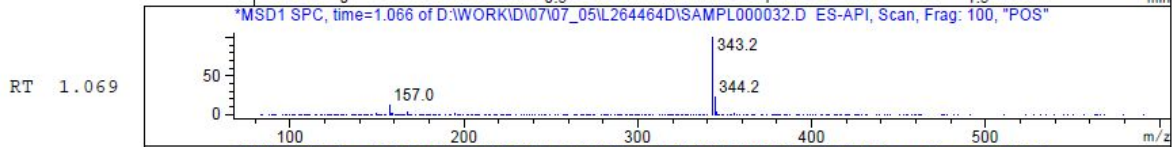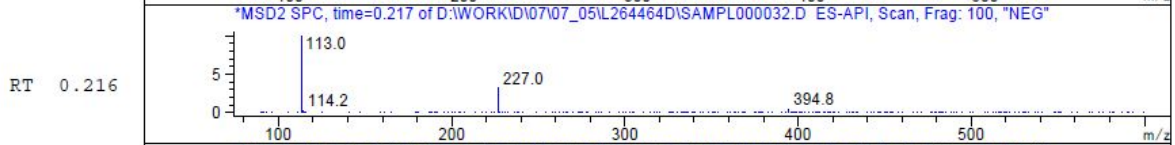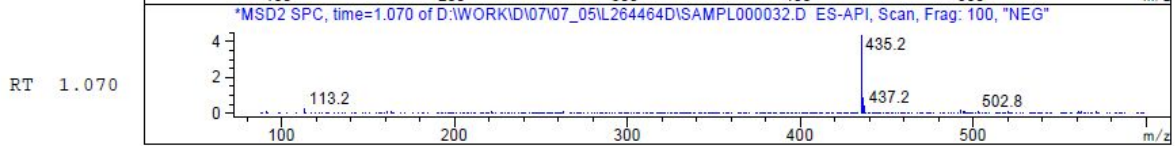

Enamine ID: Z2569757498

MaxPeak: 100.00%  
Ret\_Time: 1.040 min

Q805275\$4

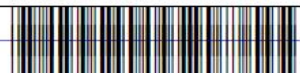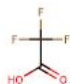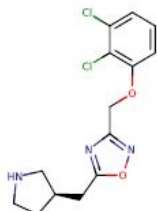

Mol Wt 442.22  
Exact Mass 327.07

| # | Time  | Area%  |
|---|-------|--------|
| 1 | 1.040 | 100.00 |

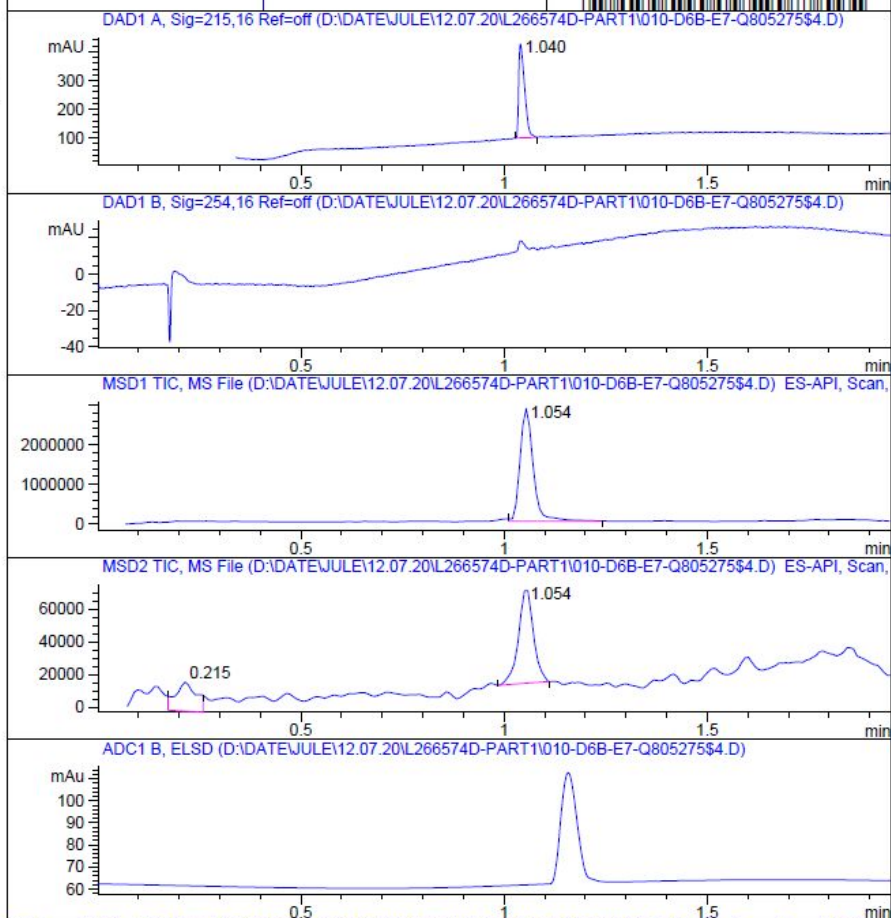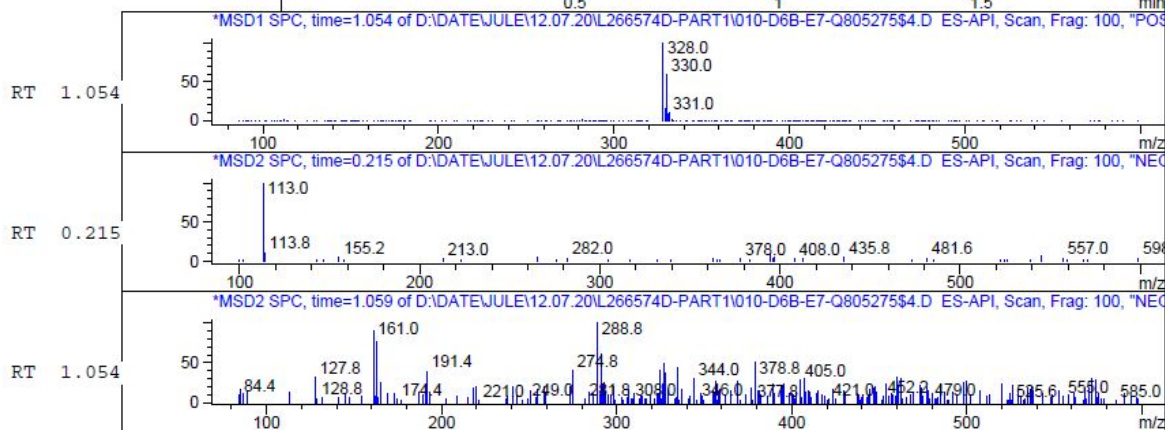

Enamine ID: Z2617873335

MaxPeak: 96.34%  
Ret\_Time: 1.072 min

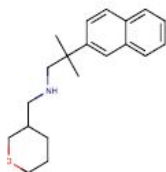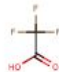

Mol Wt 411.46  
Exact Mass 297.26

| # | Time  | Area% |
|---|-------|-------|
| 1 | 0.983 | 3.66  |
| 2 | 1.072 | 96.34 |

Q905064\$2

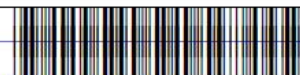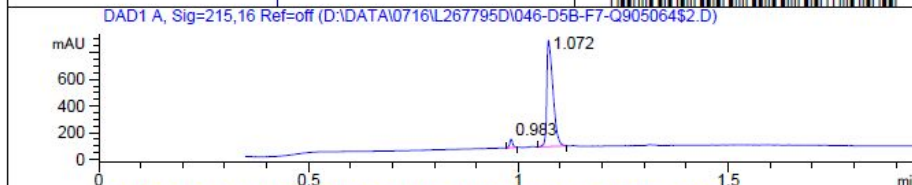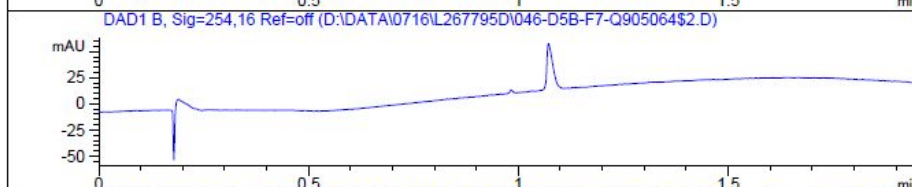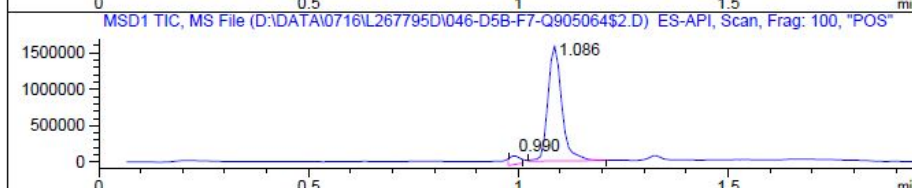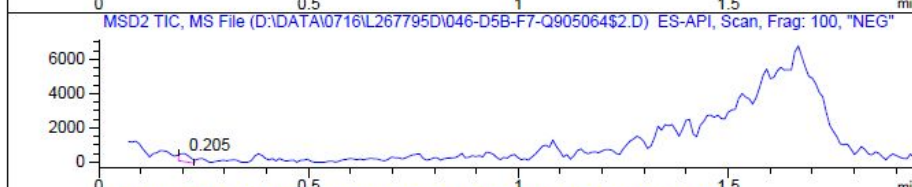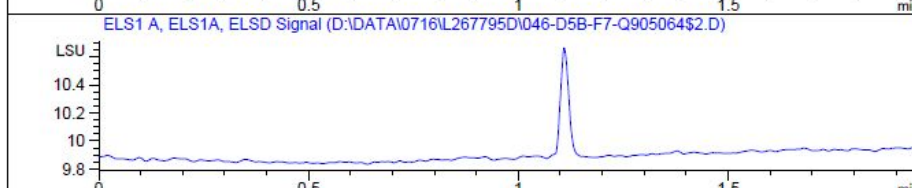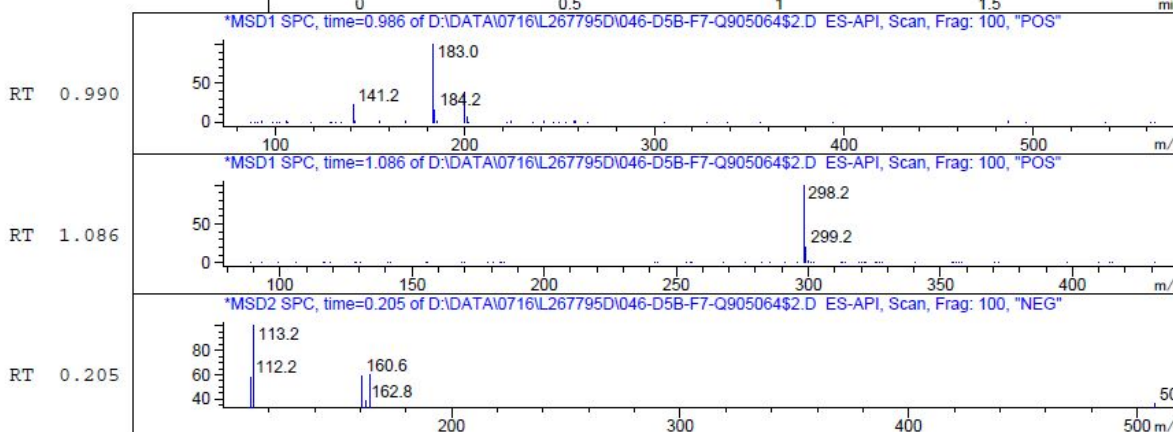

Enamine ID: Z2698567135

MaxPeak: 98.46%  
Ret\_Time: 1.134 min

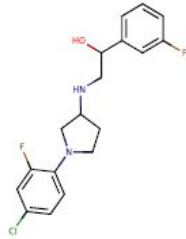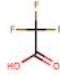

Mol Wt 466.83  
Exact Mass 352.15

| # | Time  | Area% |
|---|-------|-------|
| 1 | 1.134 | 98.46 |
| 2 | 1.182 | 1.54  |

Q754933\$1

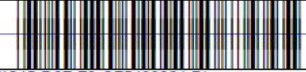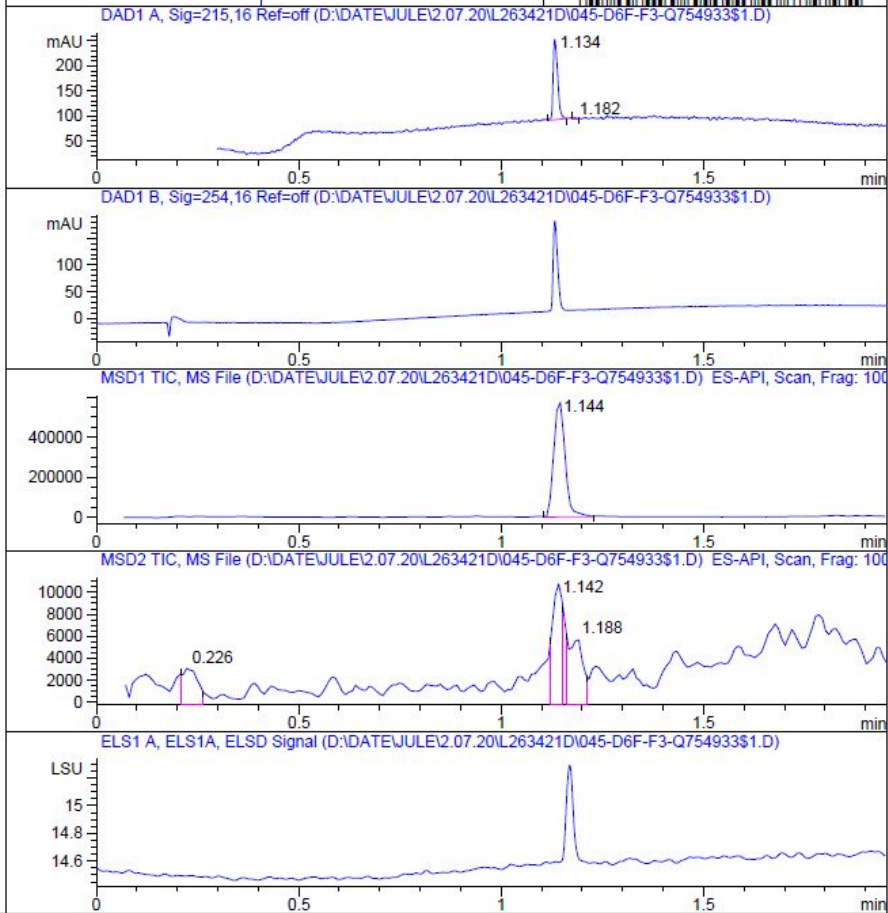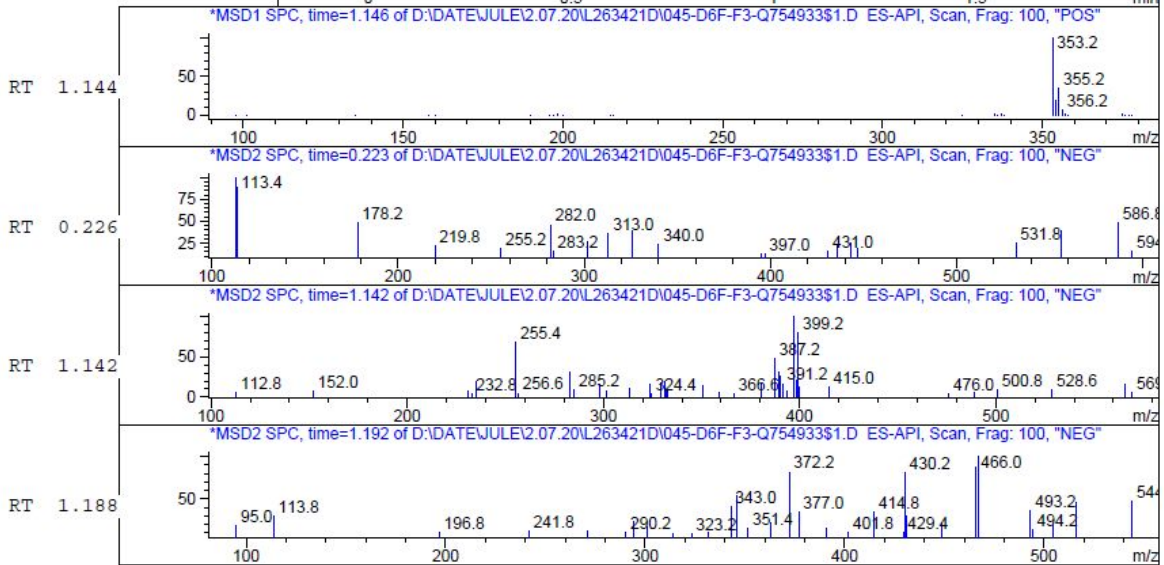

Enamine ID: Z2722622816

MaxPeak: 100.00%  
Ret\_Time: 1.046 min

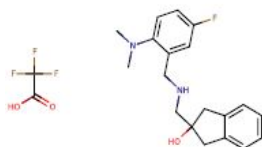

Mol Wt 428.42  
Exact Mass 314.22

| # | Time  | Area%  |
|---|-------|--------|
| 1 | 1.046 | 100.00 |

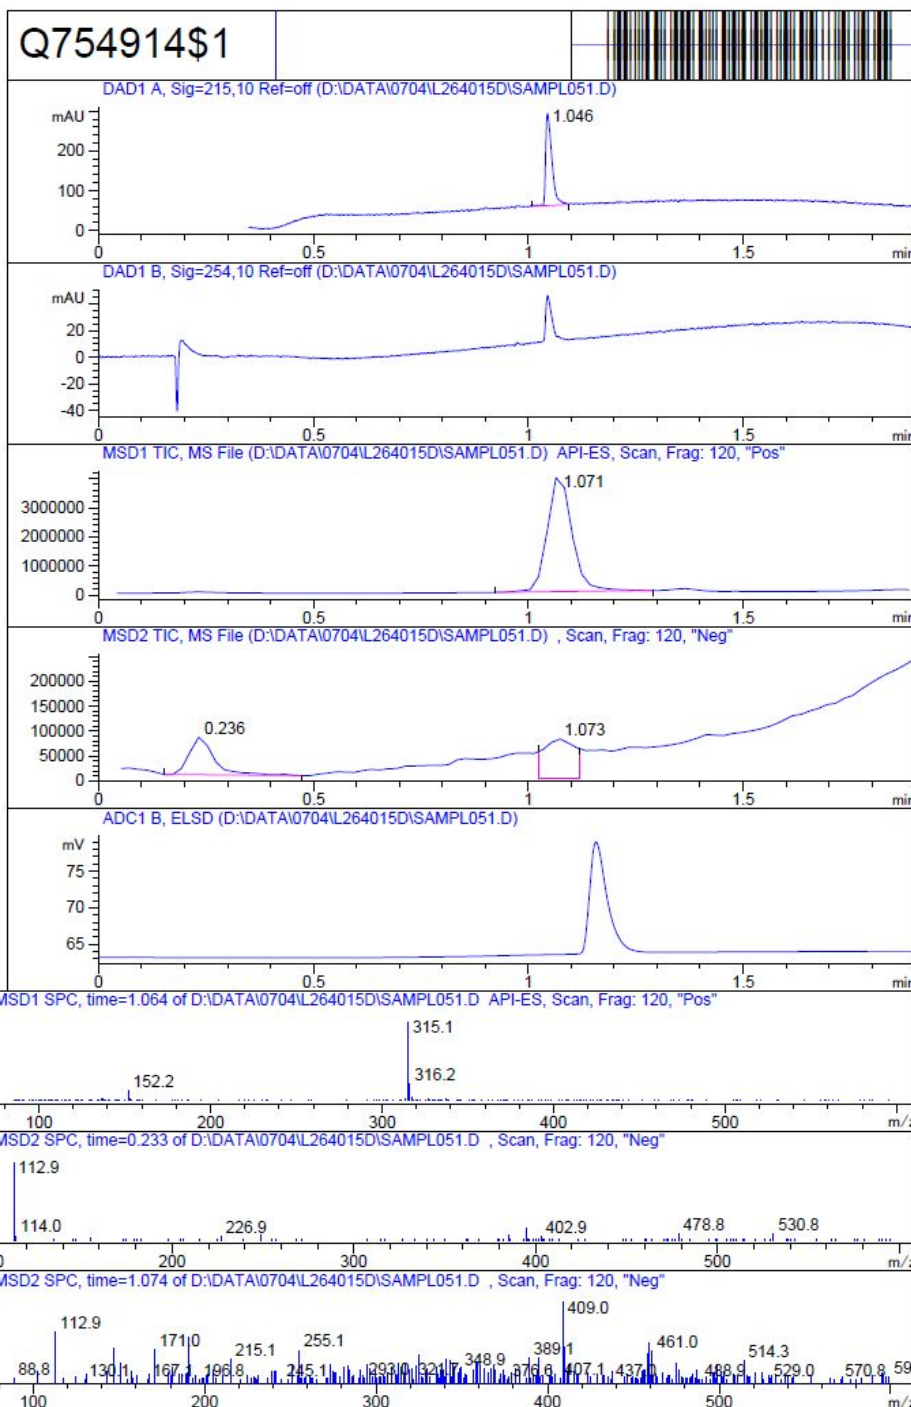

Enamine ID: Z2769565776

MaxPeak: 100.00%  
Ret\_Time: 1.025 min

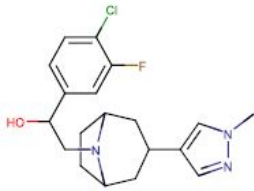

Mol Wt 363.86  
Exact Mass 363.19

| # | Time  | Area%  |
|---|-------|--------|
| 1 | 1.025 | 100.00 |

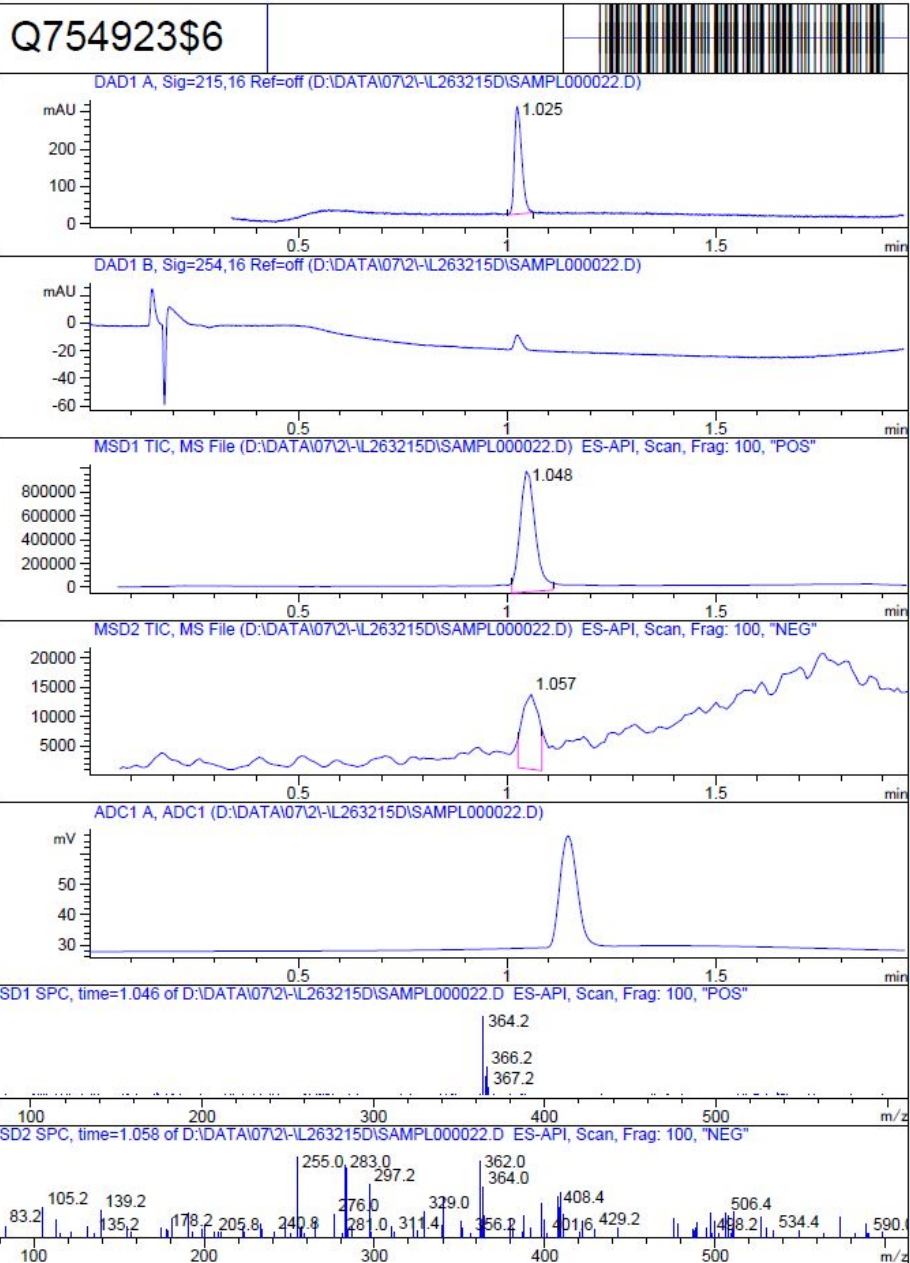

Enamine ID: Z2843312692



MaxPeak: 100.00%  
Ret\_Time: 1.076 min

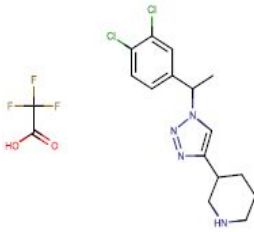

Mol Wt 439.26  
Exact Mass 324.12

| # | Time  | Area%  |
|---|-------|--------|
| 1 | 1.076 | 100.00 |

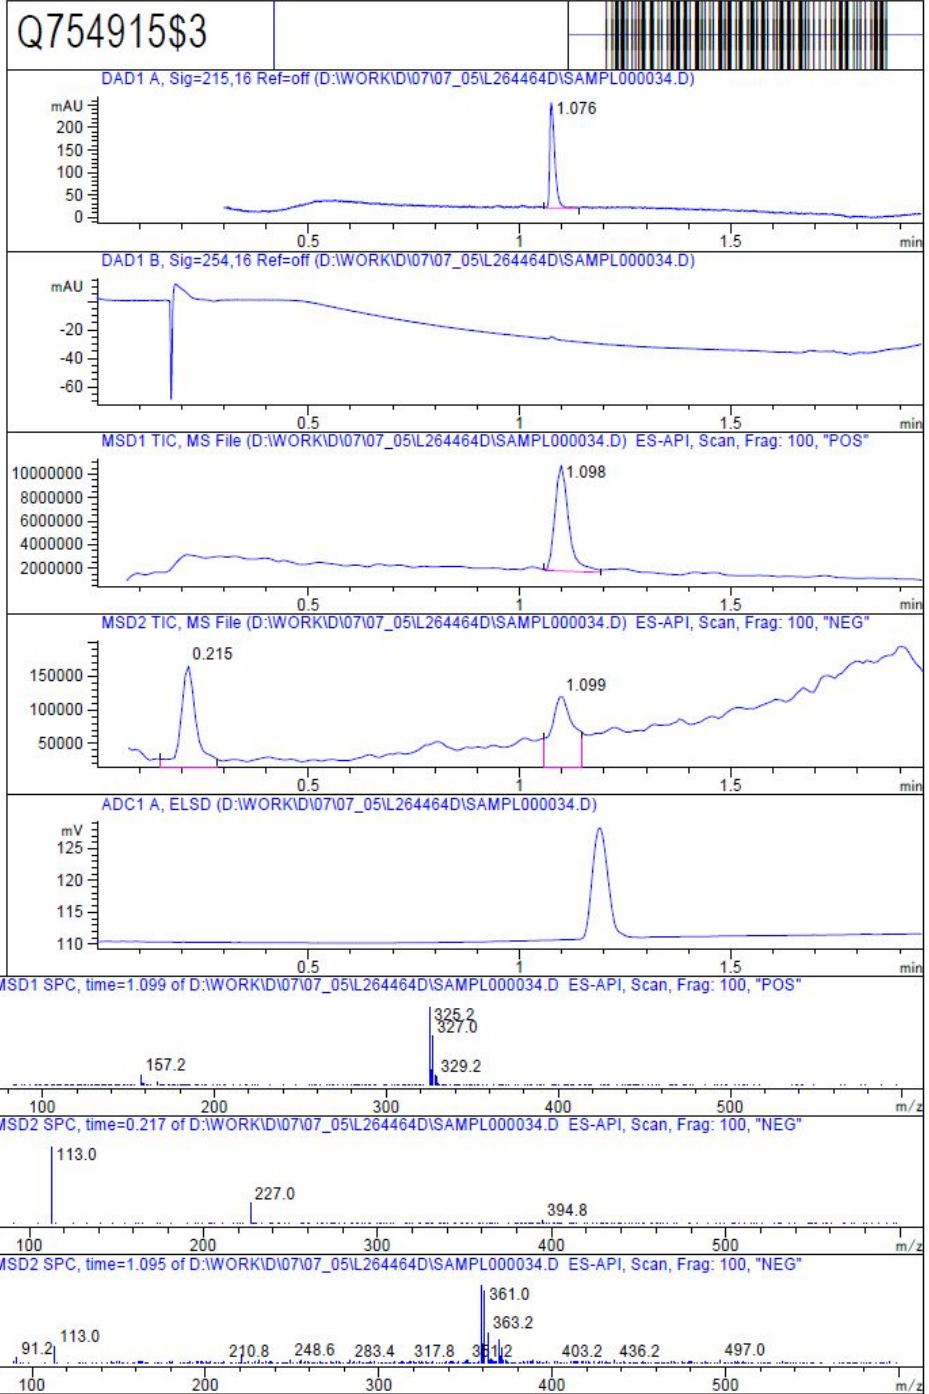

Enamine ID: Z2846041003

Q754924\$1

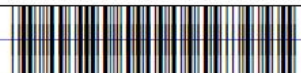

MaxPeak: 97.54%  
Ret\_Time: 1.072 min

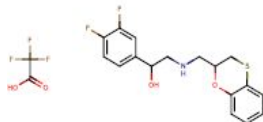

Mol Wt 451.41  
Exact Mass 337.12

| # | Time  | Area% |
|---|-------|-------|
| 1 | 0.889 | 2.46  |
| 2 | 1.072 | 97.54 |

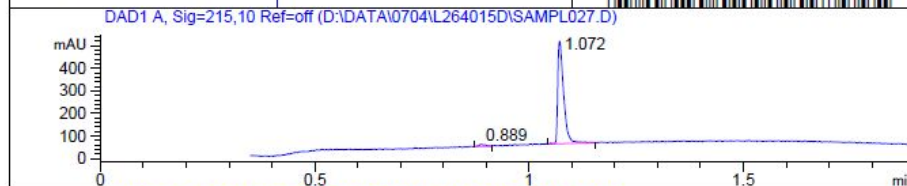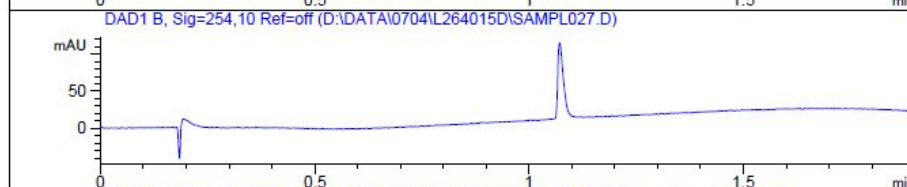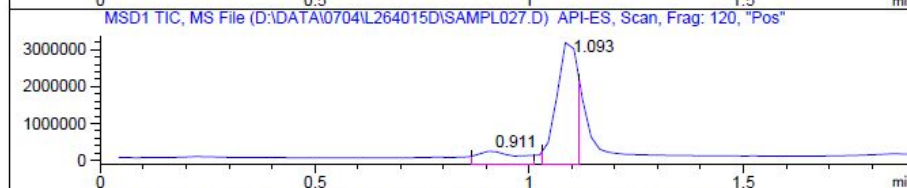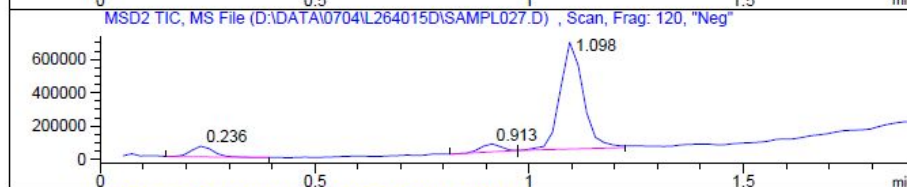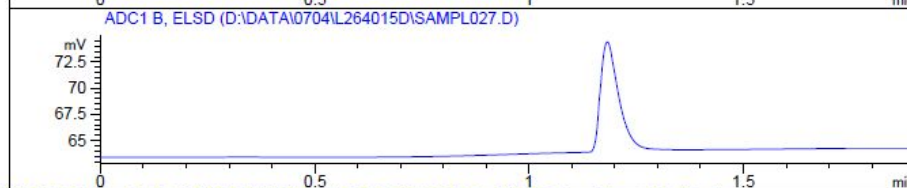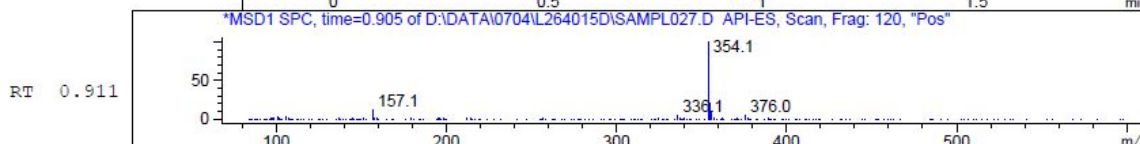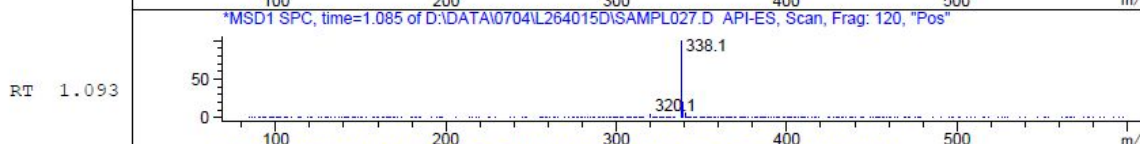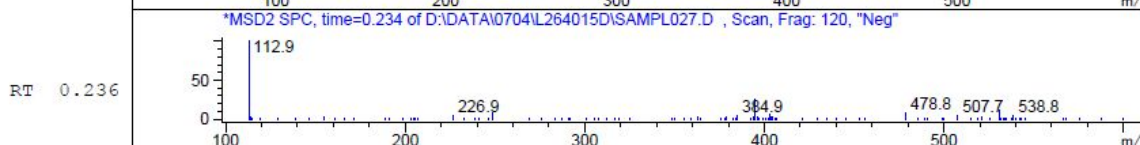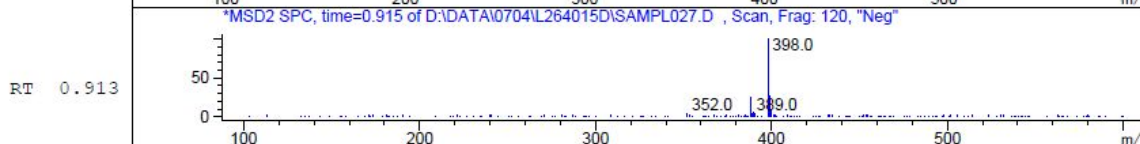

Enamine ID: Z3045122589

MaxPeak: 100.00%  
Ret\_Time: 1.106 min

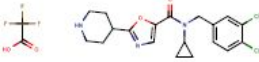

Mol Wt 508.32  
Exact Mass 393.13

| # | Time  | Area%  |
|---|-------|--------|
| 1 | 1.106 | 100.00 |

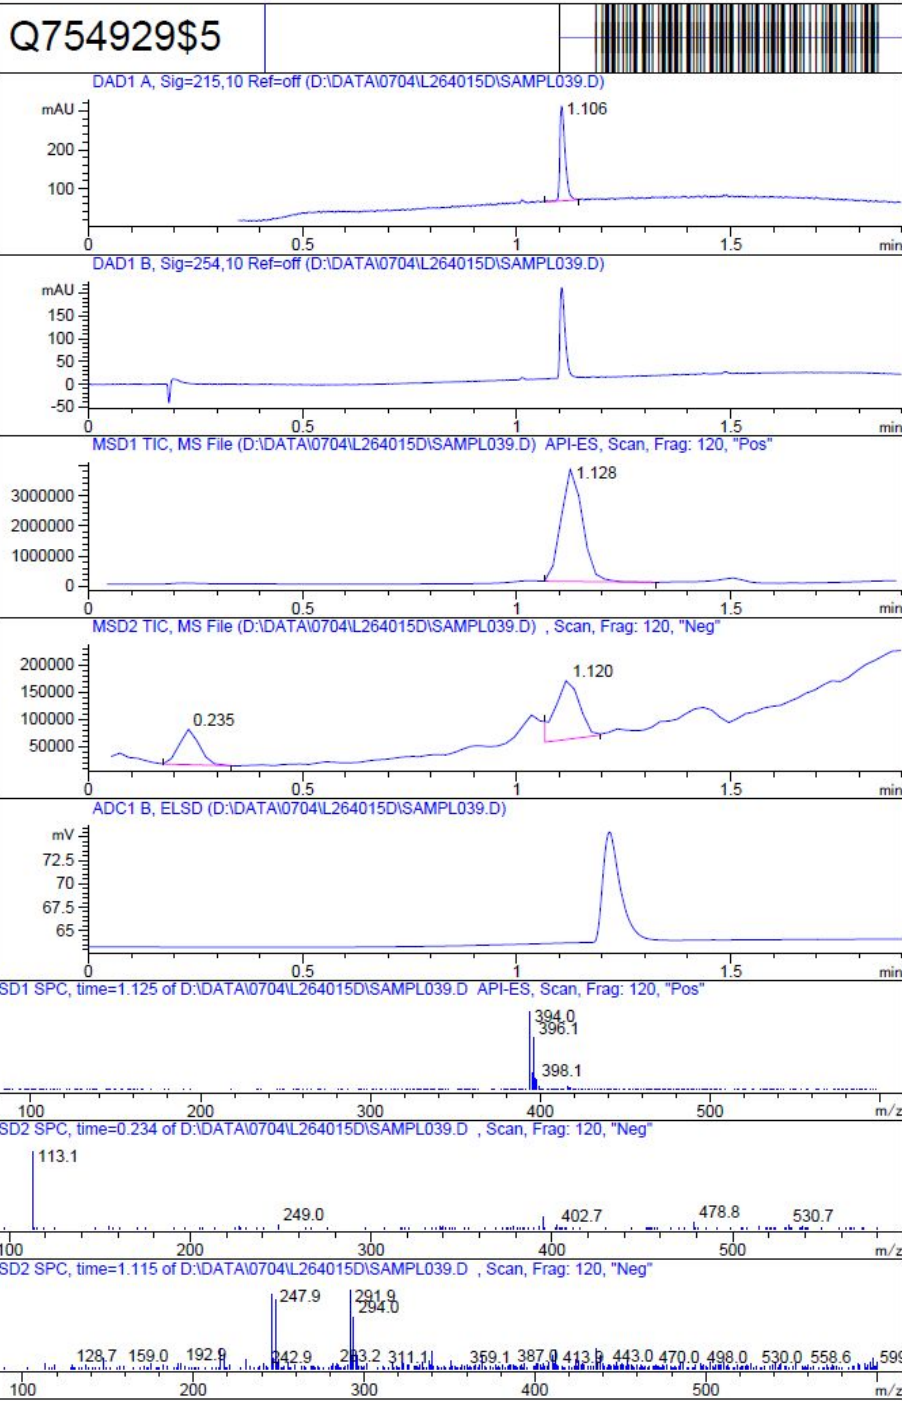

Enamine ID: Z3100431738
